# Supplementary material for: A rhodium-catalyzed C–H activation/cyclization approach toward the total syntheses of cassiarin C and 8-O-methylcassiarin A from a common intermediate
Source: Royal Society of Chemistry journal article supplement (doi:10.1039/d4ob01122h), 2024-01-01
Supplement: d4ob01122h1.pdf [file d4ob01122h1.pdf]

# Supplementary Information

## **A rhodium-catalyzed C–H activation/cyclization approach toward the total syntheses of cassiarin C and 8-*O*-methylcassiarin A from a common intermediate**

Didier F. Vargas,<sup>a</sup> Santiago Fonzo,<sup>a</sup> Sebastián O. Simonetti,<sup>a</sup> Teodoro S. Kaufman<sup>a,\*</sup>  
and Enrique L. Larghi<sup>a,\*</sup>

<sup>a</sup>Instituto de Química Rosario (IQUIR, CONICET-UNR) and Facultad de Ciencias Bioquímicas y Farmacéuticas, Universidad Nacional de Rosario, Suipacha 531, S2002LRK Rosario, República Argentina

## Table of Contents

| Subject                                                                                                                                                             | Page |
|---------------------------------------------------------------------------------------------------------------------------------------------------------------------|------|
| <b>Figure S1:</b> 300 MHz $^1\text{H}$ (top) and 75 MHz $^{13}\text{C}\{^1\text{H}\}$ (bottom) NMR spectra of compound <b>10</b> in $\text{CDCl}_3$                 | S3   |
| <b>Figure S2:</b> 300 MHz $^1\text{H}$ (top) and 75 MHz $^{13}\text{C}\{^1\text{H}\}$ (bottom) NMR spectra of compound ( <i>E</i> )- <b>11a</b> in $\text{CDCl}_3$  | S4   |
| <b>Figure S3:</b> HSQC (top) and HMBC (bottom) spectra of compound ( <i>E</i> )- <b>11a</b> in $\text{CDCl}_3$                                                      | S5   |
| <b>Figure S4:</b> NOE spectra of compound ( <i>E</i> )- <b>11a</b> in $\text{CDCl}_3$                                                                               | S6   |
| <b>Figure S5:</b> 300 MHz $^1\text{H}$ (top) and 75 MHz $^{13}\text{C}\{^1\text{H}\}$ (bottom) NMR spectra of compound ( <i>Z</i> )- <b>11a</b> in $\text{CDCl}_3$  | S7   |
| <b>Figure S6:</b> HSQC (top) and HMBC (bottom) spectra of compound ( <i>Z</i> )- <b>11a</b> in $\text{CDCl}_3$                                                      | S8   |
| <b>Figure S7:</b> NOE spectra of compound ( <i>Z</i> )- <b>11a</b> in $\text{CDCl}_3$                                                                               | S9   |
| <b>Figure S8:</b> 300 MHz $^1\text{H}$ (top) and 75 MHz $^{13}\text{C}\{^1\text{H}\}$ (bottom) NMR spectra of compound ( <i>E</i> )- <b>11b</b> in $\text{CDCl}_3$  | S10  |
| <b>Figure S9:</b> HSQC (top) and HMBC (bottom) spectra of compound ( <i>E</i> )- <b>11b</b> in $\text{CDCl}_3$                                                      | S11  |
| <b>Figure S10:</b> NOE spectra of compound ( <i>E</i> )- <b>11b</b> in $\text{CDCl}_3$                                                                              | S12  |
| <b>Figure S11:</b> 300 MHz $^1\text{H}$ (top) and 75 MHz $^{13}\text{C}\{^1\text{H}\}$ (bottom) NMR spectra of compound ( <i>Z</i> )- <b>11b</b> in $\text{CDCl}_3$ | S13  |
| <b>Figure S12:</b> HSQC (top) and HMBC (bottom) spectra of compound ( <i>Z</i> )- <b>11b</b> in $\text{CDCl}_3$                                                     | S14  |
| <b>Figure S13:</b> 300 MHz $^1\text{H}$ (top) and 75 MHz $^{13}\text{C}\{^1\text{H}\}$ (bottom) NMR spectra of compound <b>11c</b> in $\text{CDCl}_3$               | S15  |
| <b>Figure S14:</b> HSQC (top) and HMBC (bottom) spectra of compound <b>11c</b> in $\text{CDCl}_3$                                                                   | S16  |
| <b>Figure S15:</b> NOE spectra of compound <b>11c</b> in $\text{CDCl}_3$                                                                                            | S17  |
| <b>Figure S16:</b> 300 MHz $^1\text{H}$ (top) and 75 MHz $^{13}\text{C}\{^1\text{H}\}$ (bottom) NMR spectra of compound <b>11d</b> in $\text{CDCl}_3$               | S18  |
| <b>Figure S17:</b> HSQC (top) and HMBC (bottom) spectra of compound <b>11d</b> in $\text{CDCl}_3$                                                                   | S19  |
| <b>Figure S18:</b> NOE spectra of compound <b>11d</b> in $\text{CDCl}_3$                                                                                            | S20  |
| <b>Figure S19:</b> 300 MHz $^1\text{H}$ (top) and 75 MHz $^{13}\text{C}\{^1\text{H}\}$ (bottom) NMR spectra of compound <b>17</b> in $\text{CDCl}_3$                | S21  |
| <b>Figure S20:</b> HSQC (top) and HMBC (bottom) spectra of compound <b>17</b> in $\text{CDCl}_3$                                                                    | S22  |
| <b>Figure S21:</b> 300 MHz $^1\text{H}$ (top) and 75 MHz $^{13}\text{C}\{^1\text{H}\}$ (bottom) NMR spectra of compound <b>17</b> in $\text{CD}_3\text{OD}$         | S23  |
| <b>Figure S22:</b> HSQC (top) and HMBC (bottom) spectra of compound <b>17</b> in $\text{CD}_3\text{OD}$                                                             | S24  |
| <b>Figure S23:</b> 300 MHz $^1\text{H}$ (top) and 75 MHz $^{13}\text{C}\{^1\text{H}\}$ (bottom) NMR spectra of compound <b>18</b> in $\text{CDCl}_3$                | S25  |
| <b>Figure S24:</b> HSQC (top) and HMBC (bottom) spectra of compound <b>18</b> in $\text{CDCl}_3$                                                                    | S26  |
| <b>Figure S25:</b> 300 MHz $^1\text{H}$ (top) and 75 MHz $^{13}\text{C}\{^1\text{H}\}$ (bottom) NMR spectra of compound <b>19</b> in $\text{CDCl}_3$                | S27  |
| <b>Figure S26:</b> HSQC (top) and HMBC (bottom) spectra of compound <b>19</b> in $\text{CDCl}_3$                                                                    | S28  |
| <b>Figure S27:</b> 300 MHz $^1\text{H}$ (top) and 75 MHz $^{13}\text{C}\{^1\text{H}\}$ (bottom) NMR spectra of compound <b>20</b> in $\text{CDCl}_3$                | S29  |
| <b>Figure S28:</b> HSQC (top) and HMBC (bottom) spectra of compound <b>20</b> in $\text{CDCl}_3$                                                                    | S30  |
| <b>Figure S29:</b> 300 MHz $^1\text{H}$ (top) and 75 MHz $^{13}\text{C}\{^1\text{H}\}$ (bottom) NMR spectra of compound <b>22</b> in $\text{CDCl}_3$                | S31  |
| <b>Figure S30:</b> HSQC (top) and HMBC (bottom) spectra of compound <b>22</b> in $\text{CDCl}_3$                                                                    | S32  |

---

|                                                                                                                                                                                                                     |     |
|---------------------------------------------------------------------------------------------------------------------------------------------------------------------------------------------------------------------|-----|
| <b>Figure S31:</b> 400 MHz $^1\text{H}$ (top) and 100 MHz $^{13}\text{C}\{^1\text{H}\}$ (bottom) NMR spectra of compound <b>1d</b> in $\text{CD}_3\text{OD}$                                                        | S33 |
| <b>Figure S32:</b> HSQC (top) and HMBC (bottom) spectra of compound <b>1d</b> in $\text{CD}_3\text{OD}$                                                                                                             | S34 |
| <b>Figure S33:</b> 400 MHz $^1\text{H}$ NMR spectra of H/D-exchange of compound <b>1d</b> at in $\text{CD}_3\text{OD}$                                                                                              | S35 |
| <b>Figure S34:</b> 400 MHz $^1\text{H}$ (top) and 100 MHz $^{13}\text{C}\{^1\text{H}\}$ (bottom) NMR spectra of compound [ <b>3<math>\beta</math>,7-<i>d</i><sub>2</sub></b> ]- <b>1d</b> in $\text{CD}_3\text{OD}$ | S36 |
| <b>Figure S35:</b> 400 MHz $^1\text{H}$ (top) and 100 MHz $^{13}\text{C}\{^1\text{H}\}$ (bottom) NMR spectra of compound <b>1m</b> in $\text{CD}_3\text{OD}$                                                        | S37 |
| <b>Figure S36:</b> HSQC (top) and HMBC (bottom) spectra of compound <b>1m</b> in $\text{CD}_3\text{OD}$                                                                                                             | S38 |
| <b>Figure S37:</b> 400 MHz $^1\text{H}$ (top) and 100 MHz $^{13}\text{C}\{^1\text{H}\}$ (bottom) NMR spectra of compound <b>1m</b> in $\text{CDCl}_3$                                                               | S39 |
| <b>Figure S38:</b> HSQC (top) and HMBC (bottom) spectra of compound <b>1m</b> in $\text{CDCl}_3$                                                                                                                    | S40 |
| <b>Table S1:</b> Reaction conditions for formation of 7-methoxy-2-methylchroman-4-one ( <b>10</b> )                                                                                                                 | S41 |
| <b>Table S2:</b> Optimization of reaction conditions with isopropenyl acetate ( <b>13</b> )                                                                                                                         | S42 |
| <b>Table S3:</b> H/D-exchange reaction of <b>17</b>                                                                                                                                                                 | S43 |
| <b>Figure S39:</b> A) H/D exchange of compound <b>1d</b> at the H-3 $\beta$ (■) and H-7 (●) sites                                                                                                                   | S44 |
| <b>Table S4:</b> Spectroscopic comparison of $^1\text{H}$ NMR data of cassiarin C ( <b>1d</b> )                                                                                                                     | S45 |
| <b>Table S5:</b> Spectroscopic comparison of $^{13}\text{C}\{^1\text{H}\}$ NMR data of cassiarin C ( <b>1d</b> )                                                                                                    | S46 |
| <b>Table S6:</b> Spectroscopic comparison of $^1\text{H}$ NMR data of 8- <i>O</i> -Methyl cassiarin A ( <b>1m</b> )                                                                                                 | S47 |
| <b>Table S7:</b> Spectroscopic comparison of $^{13}\text{C}\{^1\text{H}\}$ NMR data of 8- <i>O</i> -Methyl cassiarin A ( <b>1m</b> )                                                                                | S48 |
| <b>Table S8:</b> Transformation of chromenone <b>23</b> with methoxylamine hydrochloride                                                                                                                            | S49 |
| <b>Figure S40:</b> 300 MHz $^1\text{H}$ (top) and 75 MHz $^{13}\text{C}\{^1\text{H}\}$ (bottom) NMR spectra of compound <b>25</b> in $\text{CDCl}_3$                                                                | S50 |
| <b>Figure S41:</b> HSQC (top) and HMBC (bottom) spectra of compound <b>25</b> in $\text{CDCl}_3$                                                                                                                    | S51 |
| <b>Figure S42:</b> 300 MHz $^1\text{H}$ (top) and 75 MHz $^{13}\text{C}\{^1\text{H}\}$ (bottom) NMR spectra of compound <b>26</b> in $\text{CDCl}_3$                                                                | S52 |
| <b>Figure S43:</b> HSQC spectra of compound <b>26</b> in $\text{CDCl}_3$                                                                                                                                            | S53 |
| <b>Scheme S1.</b> Total synthesis of cassiarin C ( <b>1d</b> ) and 8- <i>O</i> -methylcassiarin A ( <b>1m</b> )                                                                                                     | S54 |
| <b>Computational Methods</b>                                                                                                                                                                                        | S55 |
| <b>Molecular orbitals of the starting materials and intermediates</b>                                                                                                                                               | S56 |
| <b>Cartesian Coordinates</b>                                                                                                                                                                                        | S57 |
| <b>References</b>                                                                                                                                                                                                   | S70 |

---

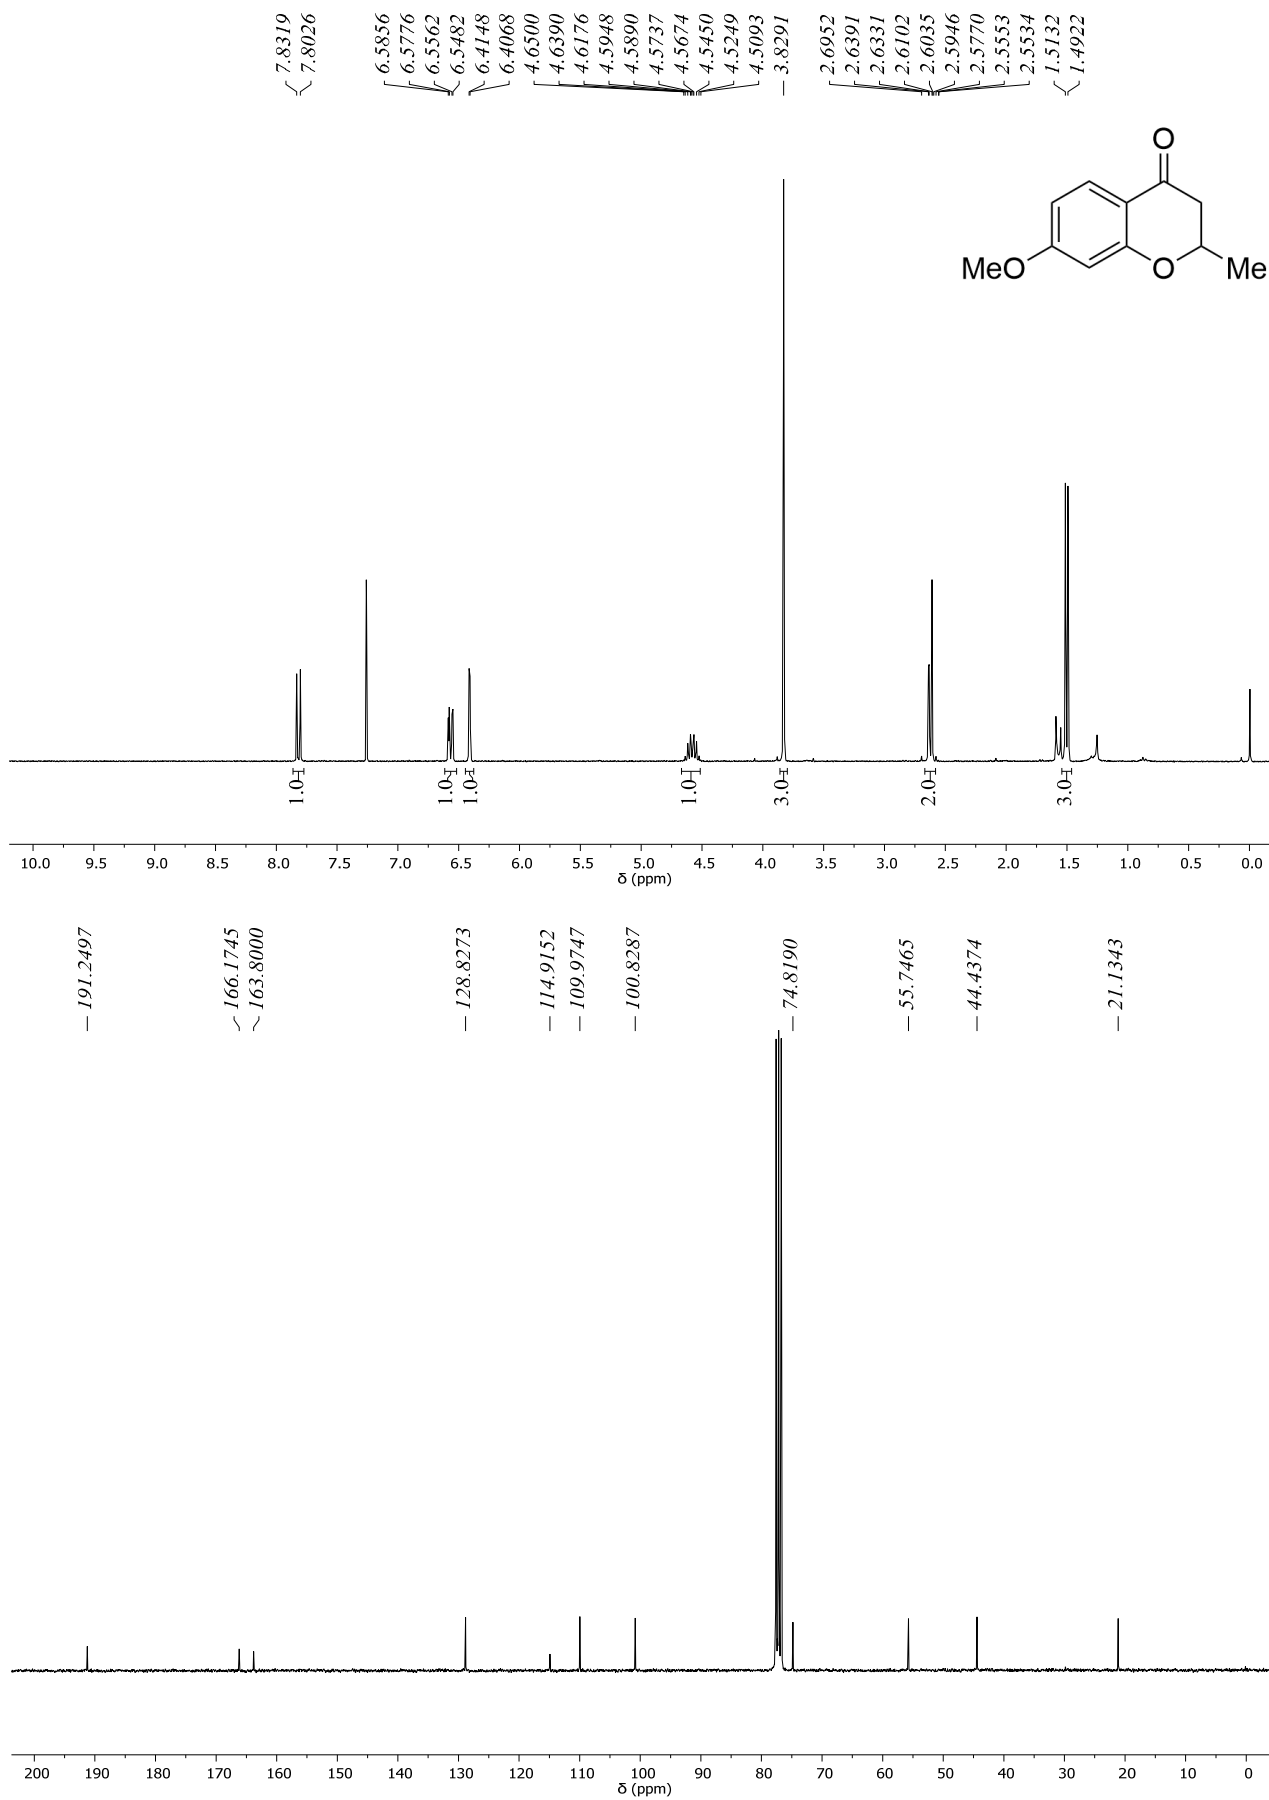

**Figure S1:** 300 MHz <sup>1</sup>H (top) and 75 MHz <sup>13</sup>C {<sup>1</sup>H} (bottom) NMR spectra of compound **10** in CDCl<sub>3</sub>.

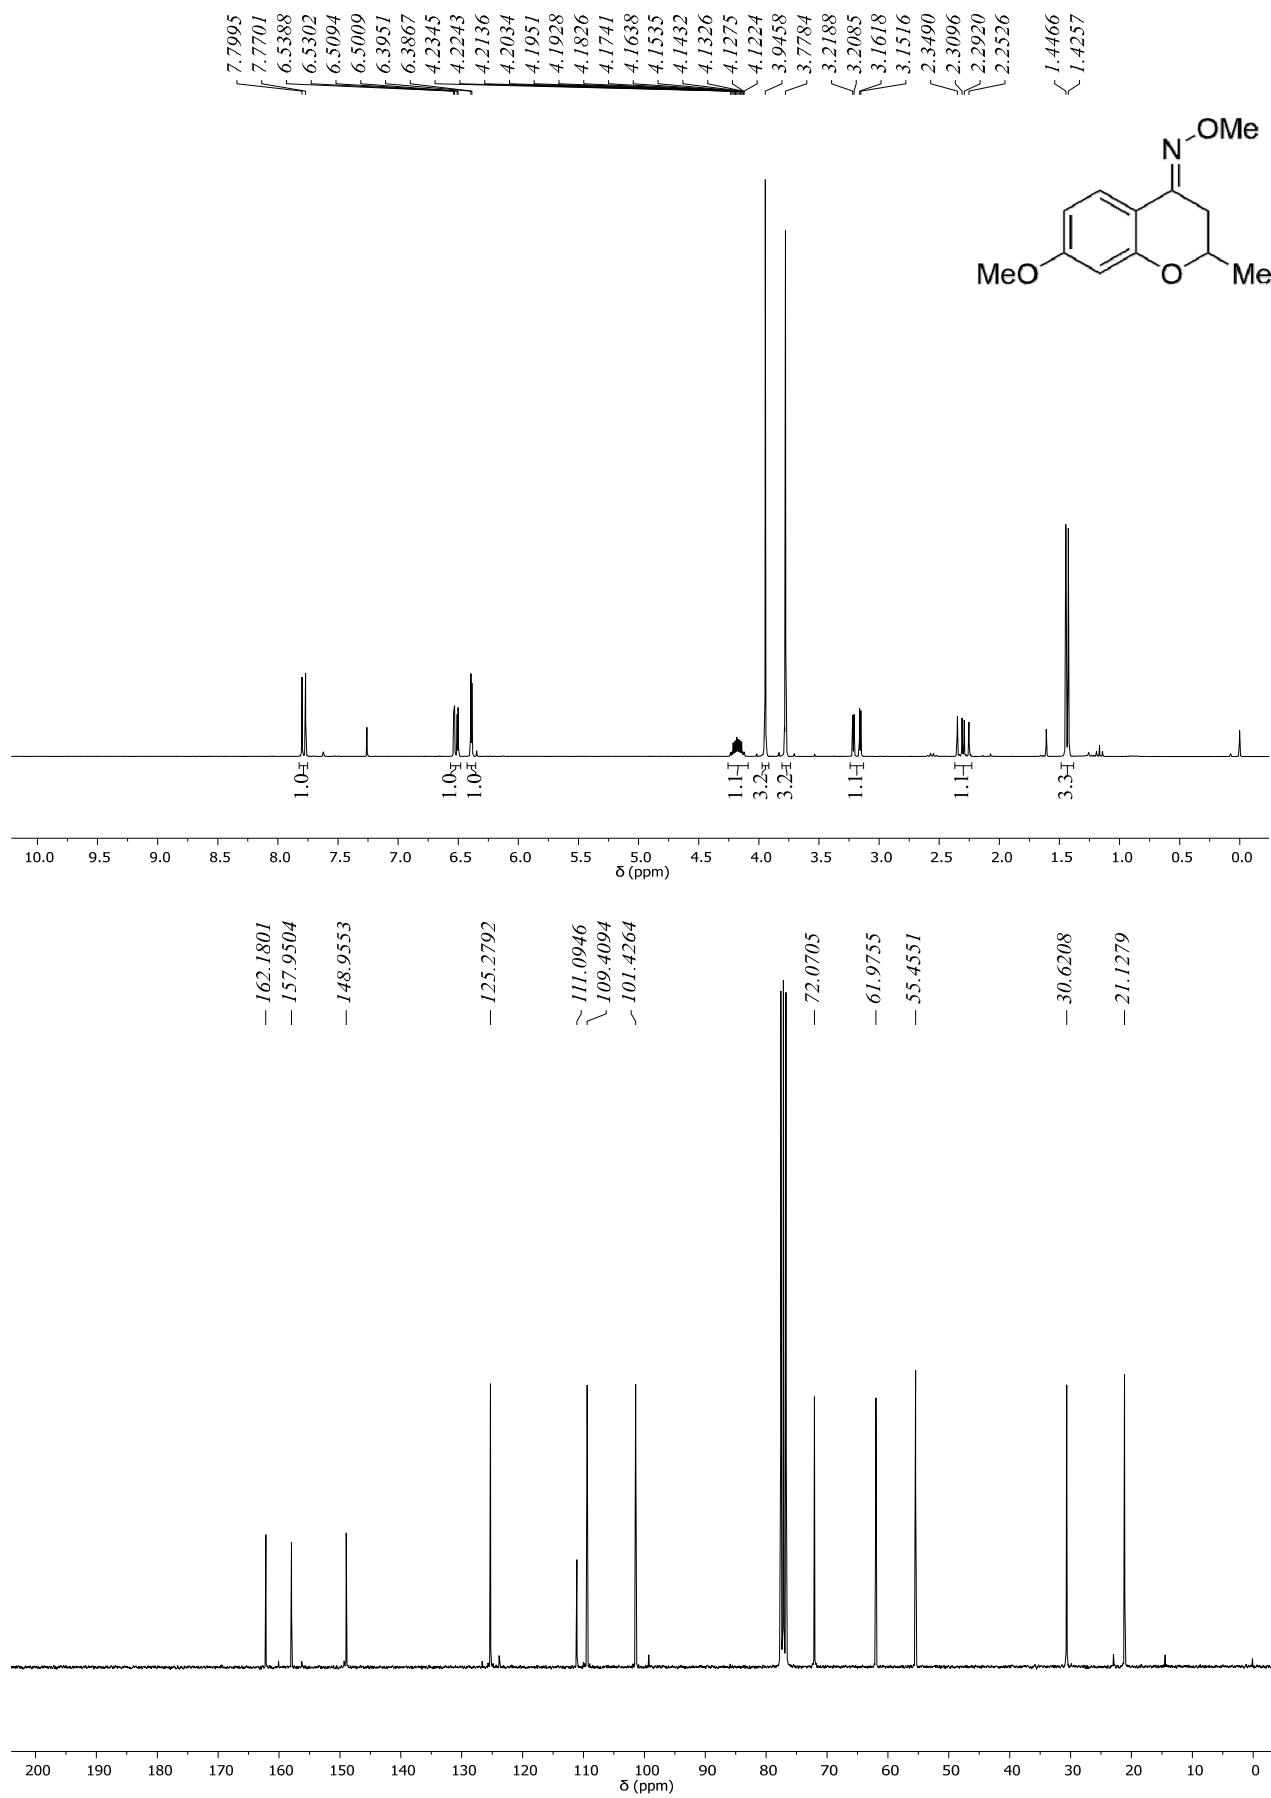

**Figure S2:** 300 MHz <sup>1</sup>H (top) and 75 MHz <sup>13</sup>C{<sup>1</sup>H} (bottom) NMR spectra of compound (E)-11a in CDCl<sub>3</sub>.

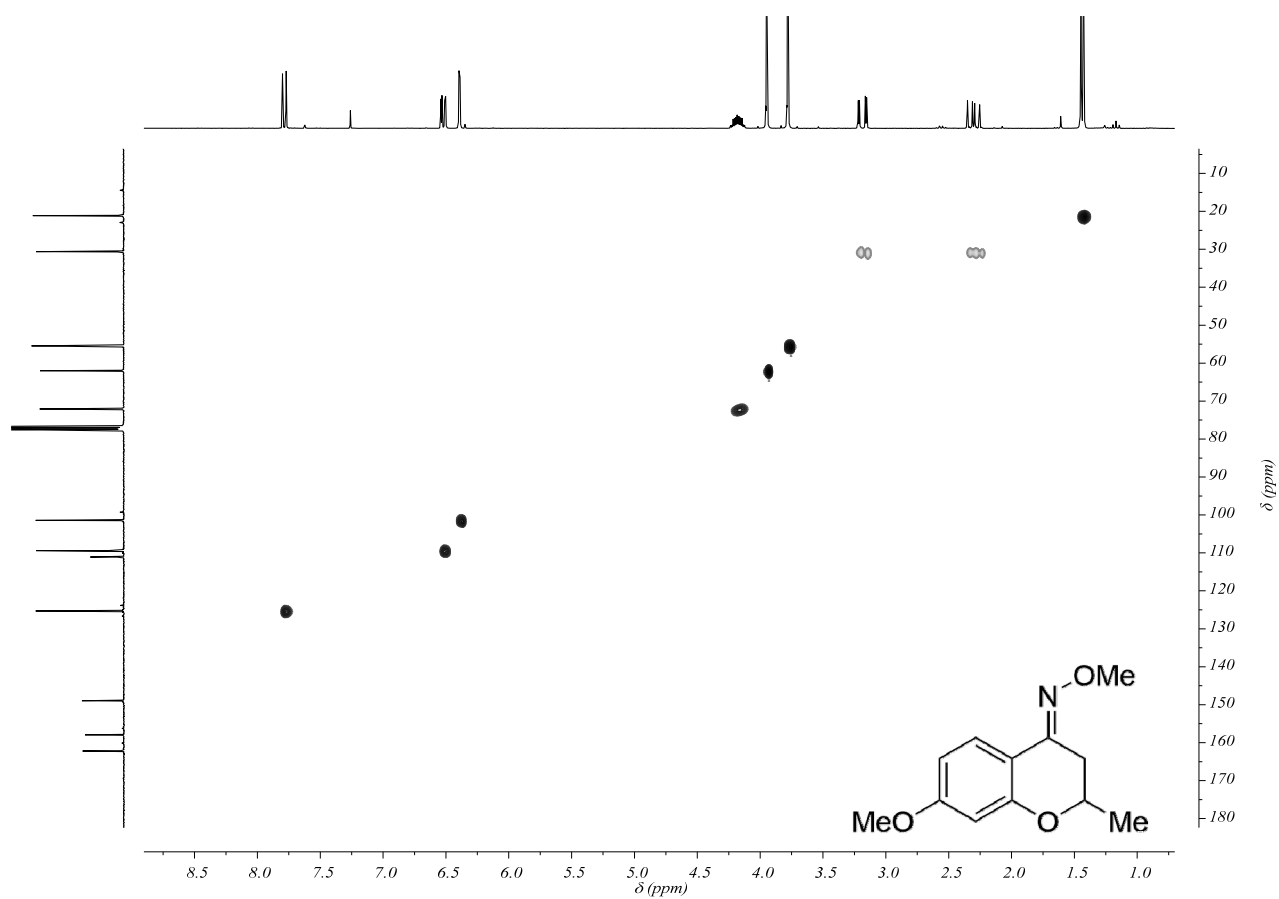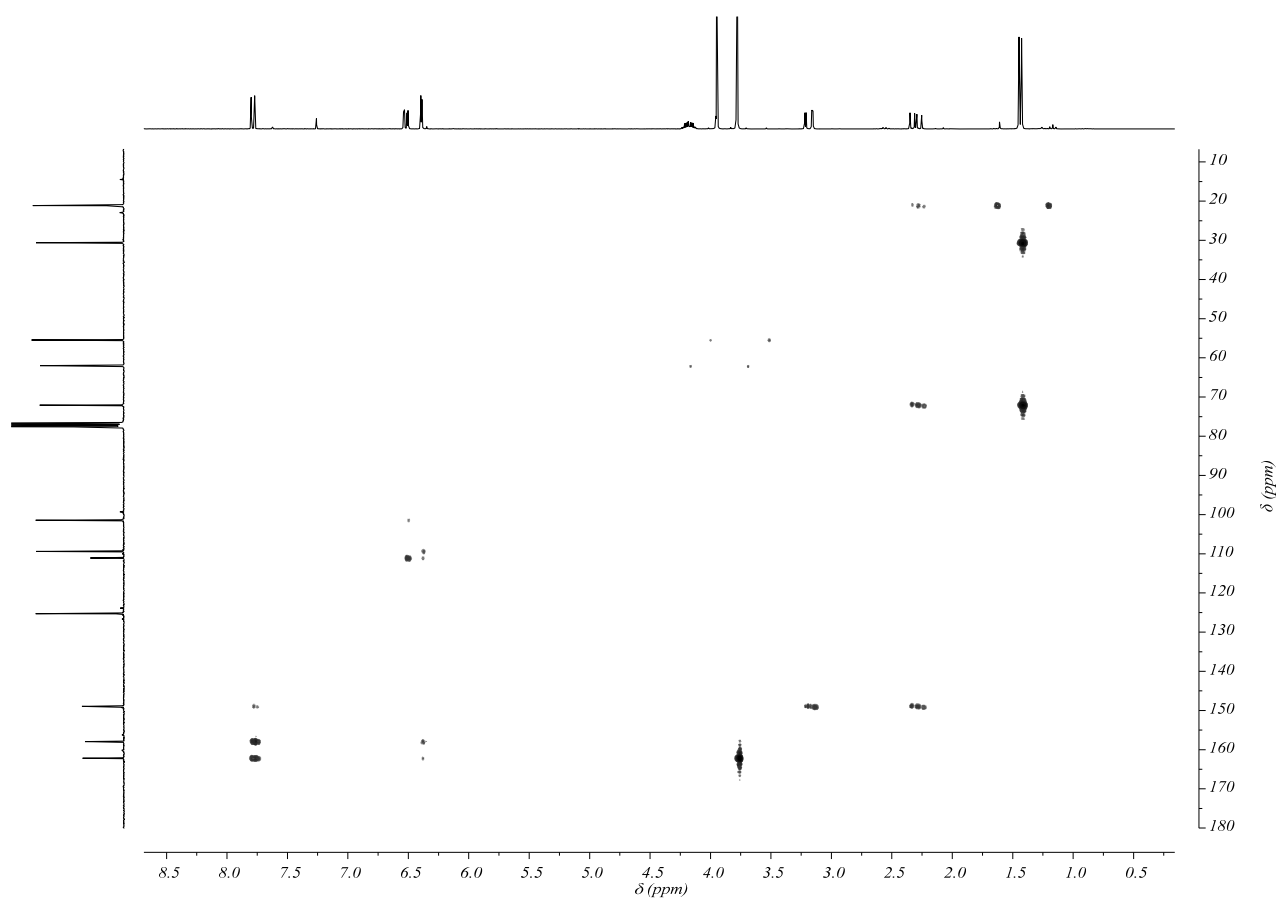

**Figure S3:** HSQC (top) and HMBC (bottom) spectra of compound (E)-11a in  $\text{CDCl}_3$ .

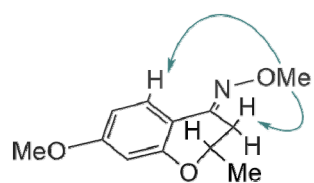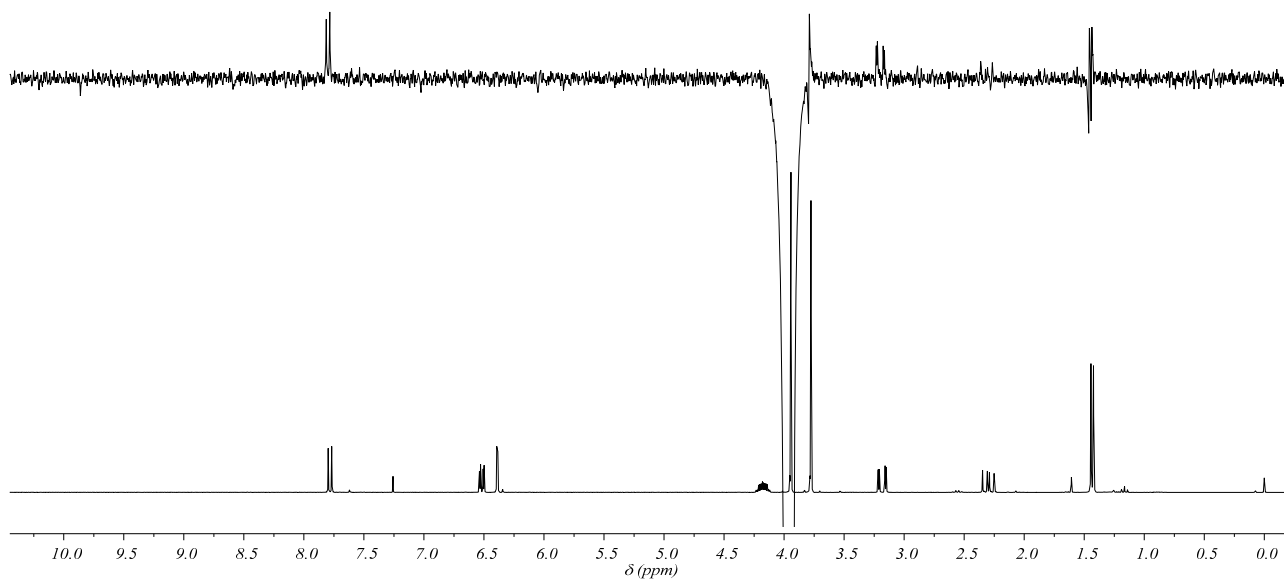

**Figure S4:** NOE spectra of compound (*E*)-11a in CDCl<sub>3</sub>.

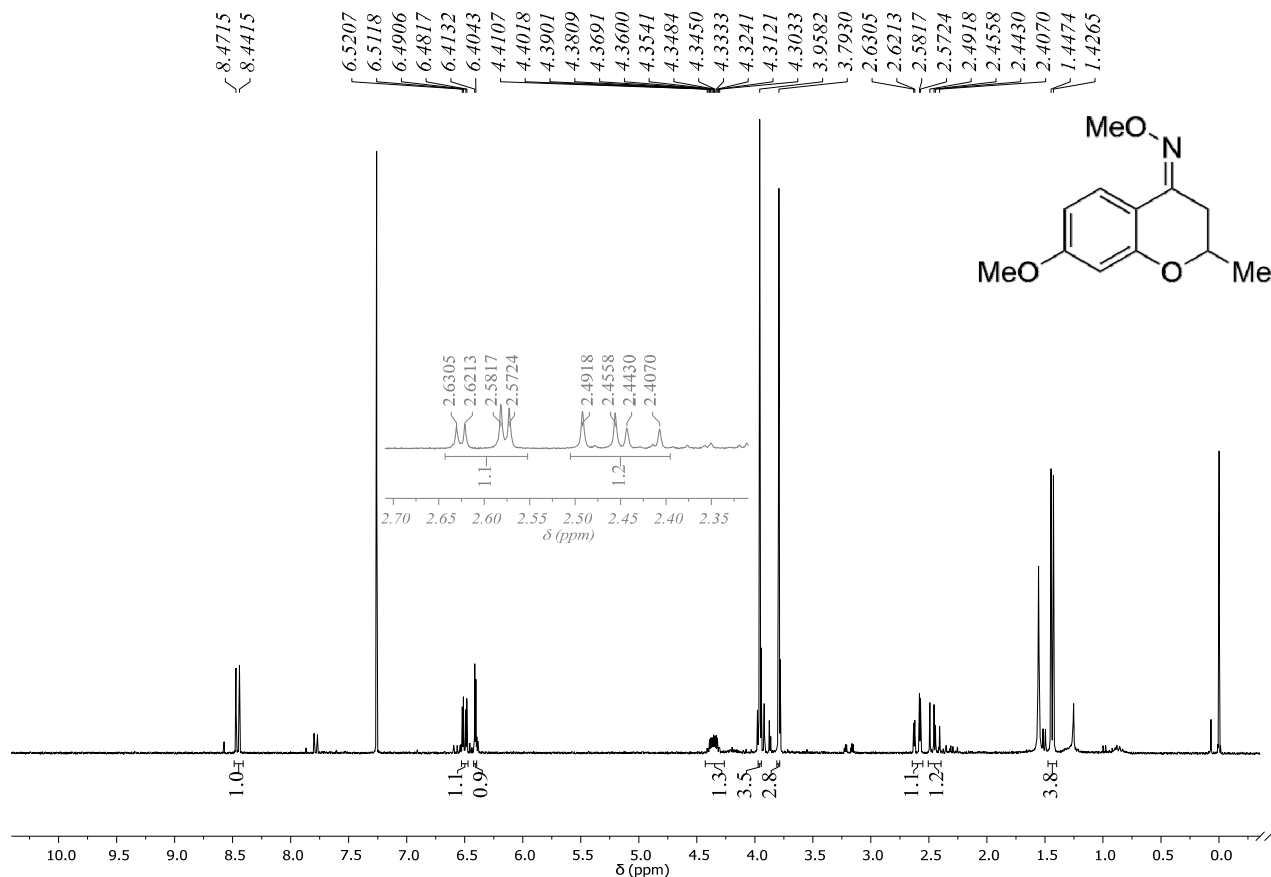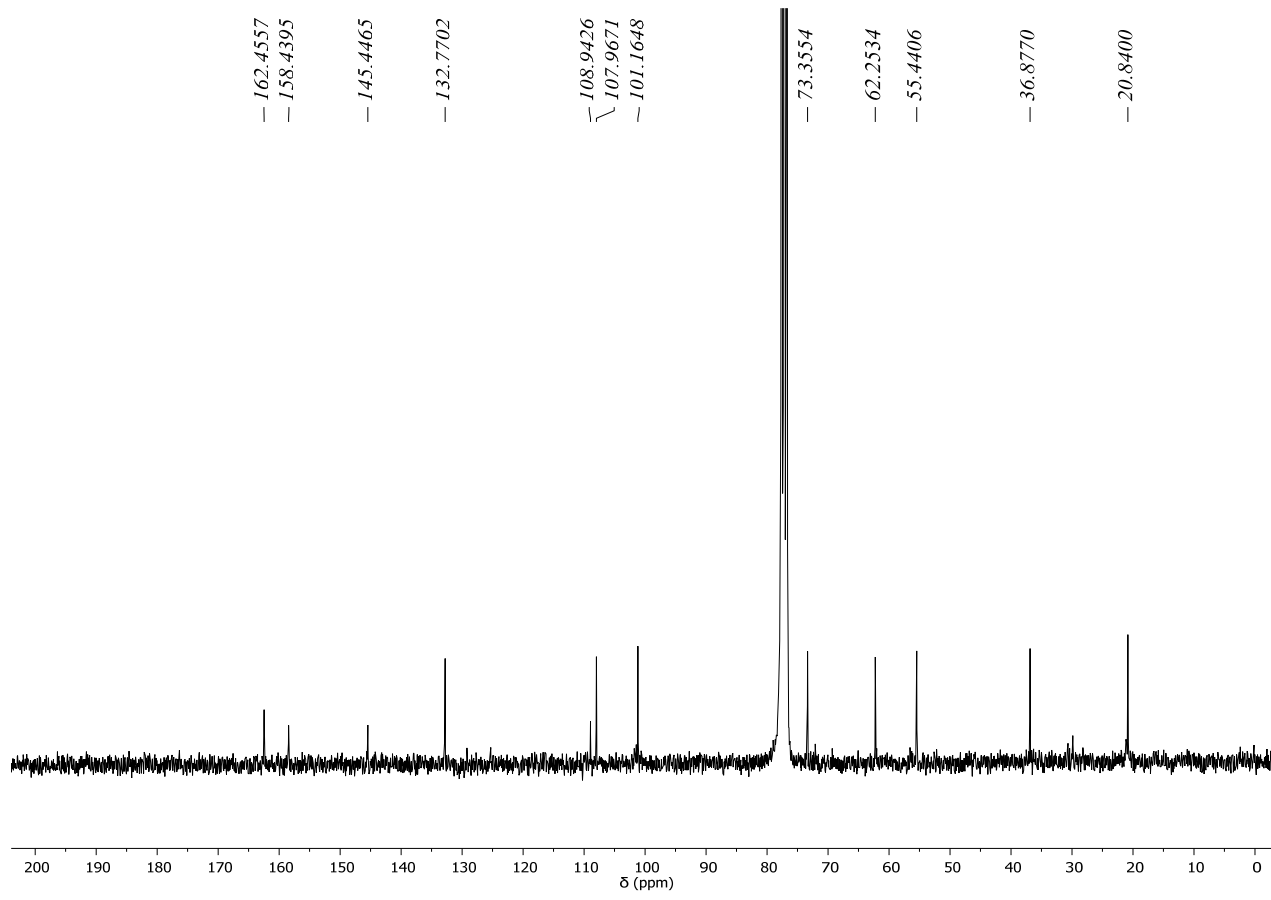

Figure S5: 300 MHz <sup>1</sup>H (top) and 75 MHz <sup>13</sup>C{<sup>1</sup>H} (bottom) NMR spectra of compound (Z)-11a in CDCl<sub>3</sub>.



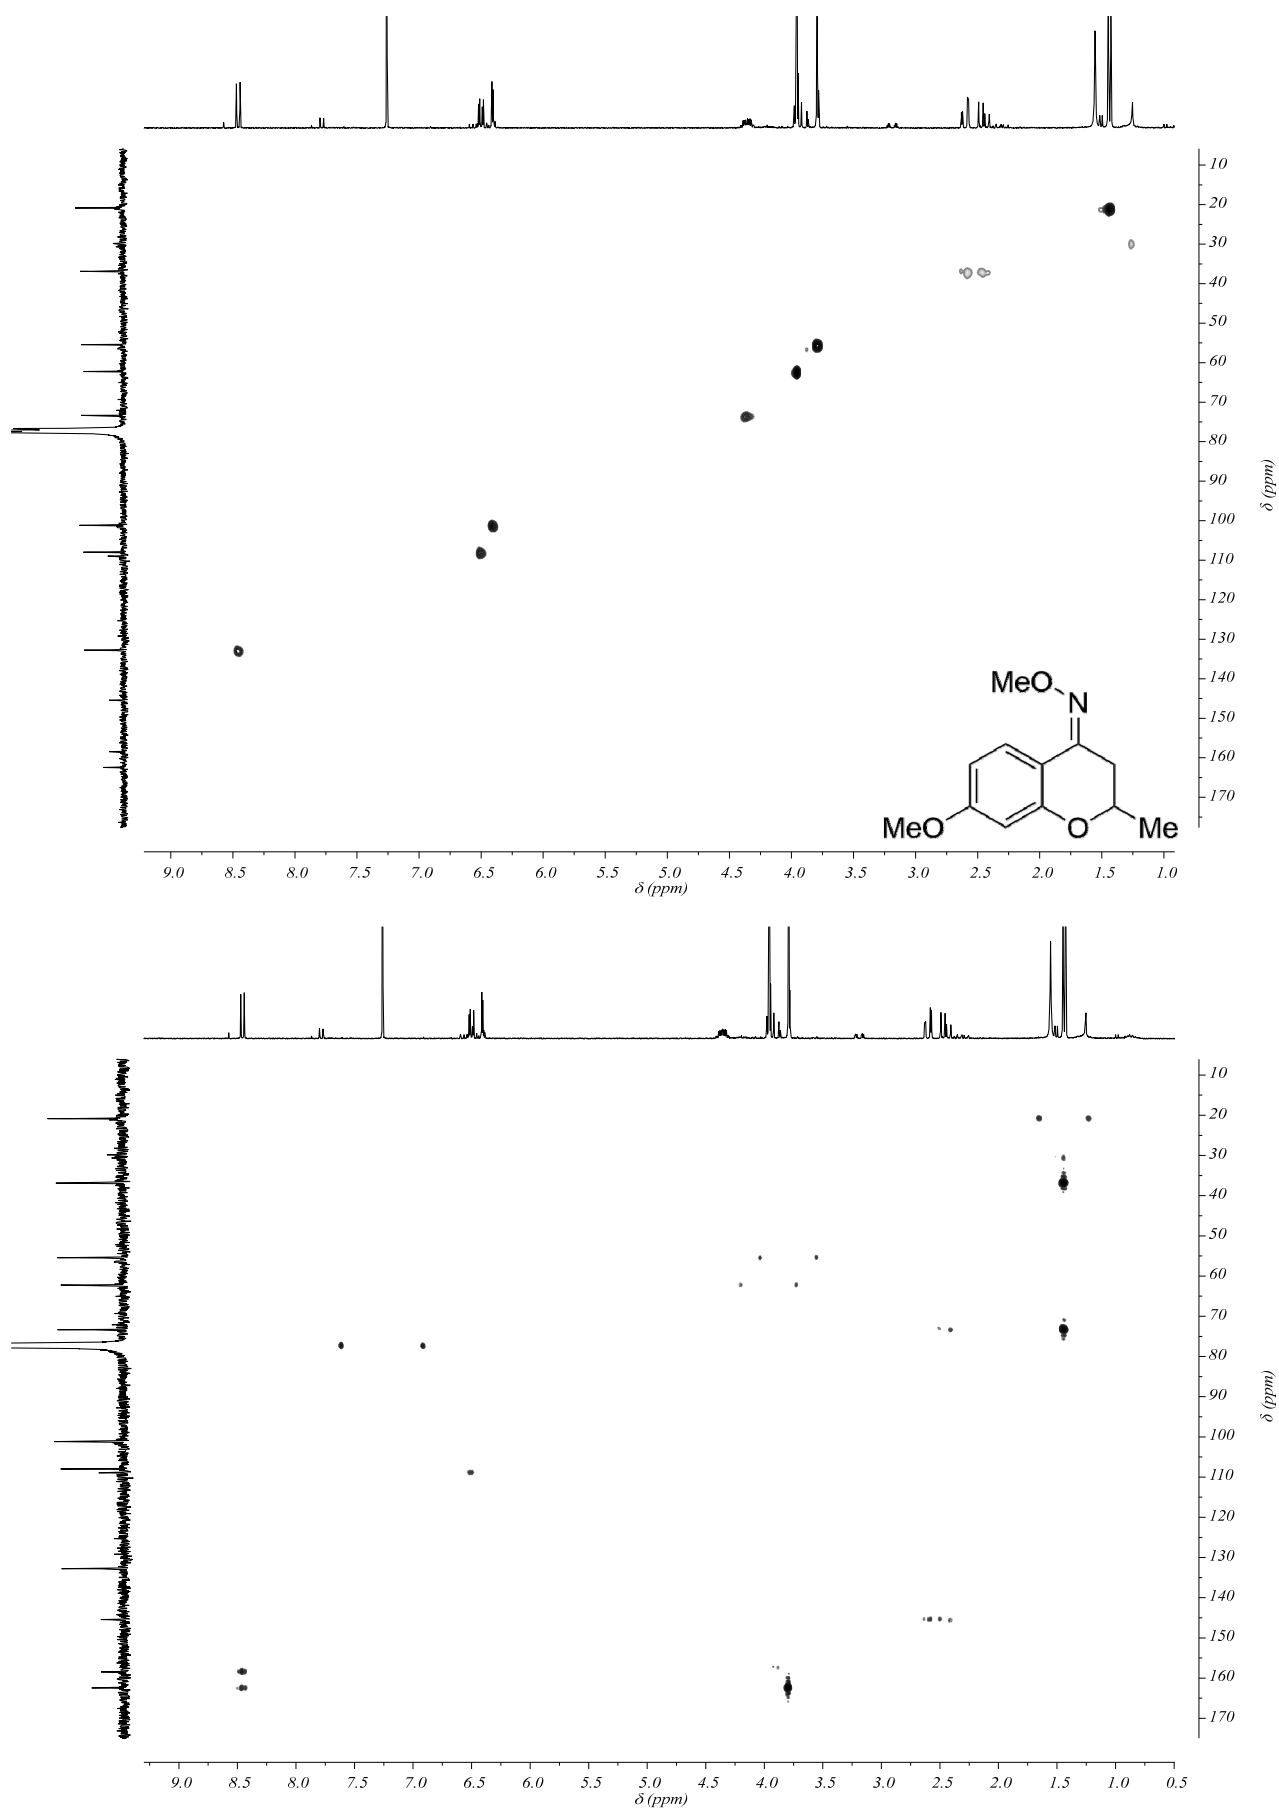

**Figure S6:** HSQC (top) and HMBC (bottom) spectra of compound (Z)-11a in CDCl<sub>3</sub>.

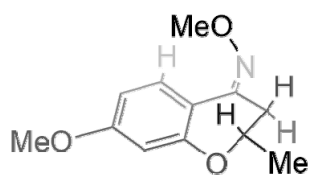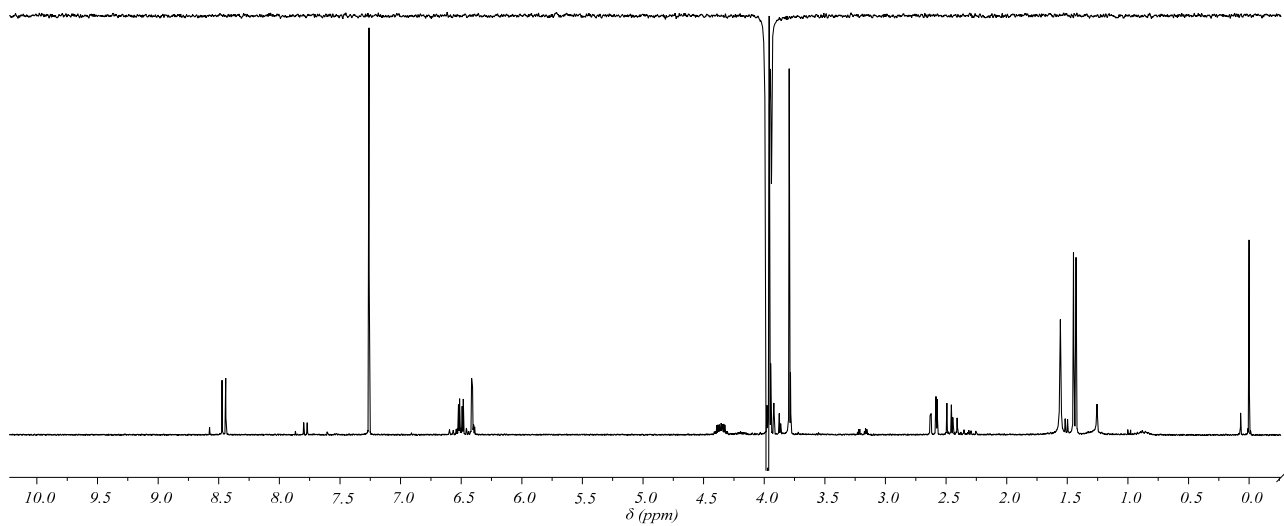

**Figure S7:** NOE spectra of compound (Z)-11a in CDCl<sub>3</sub>.

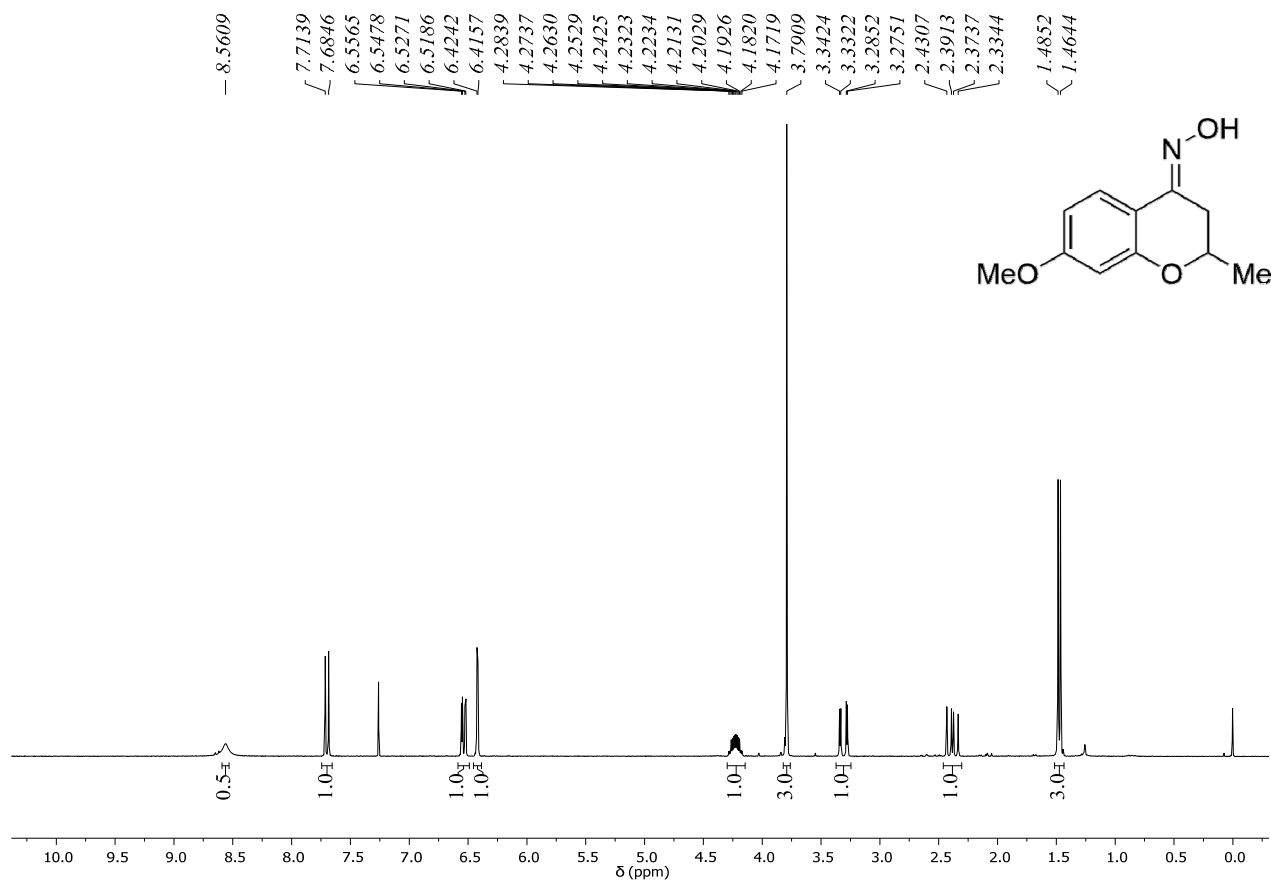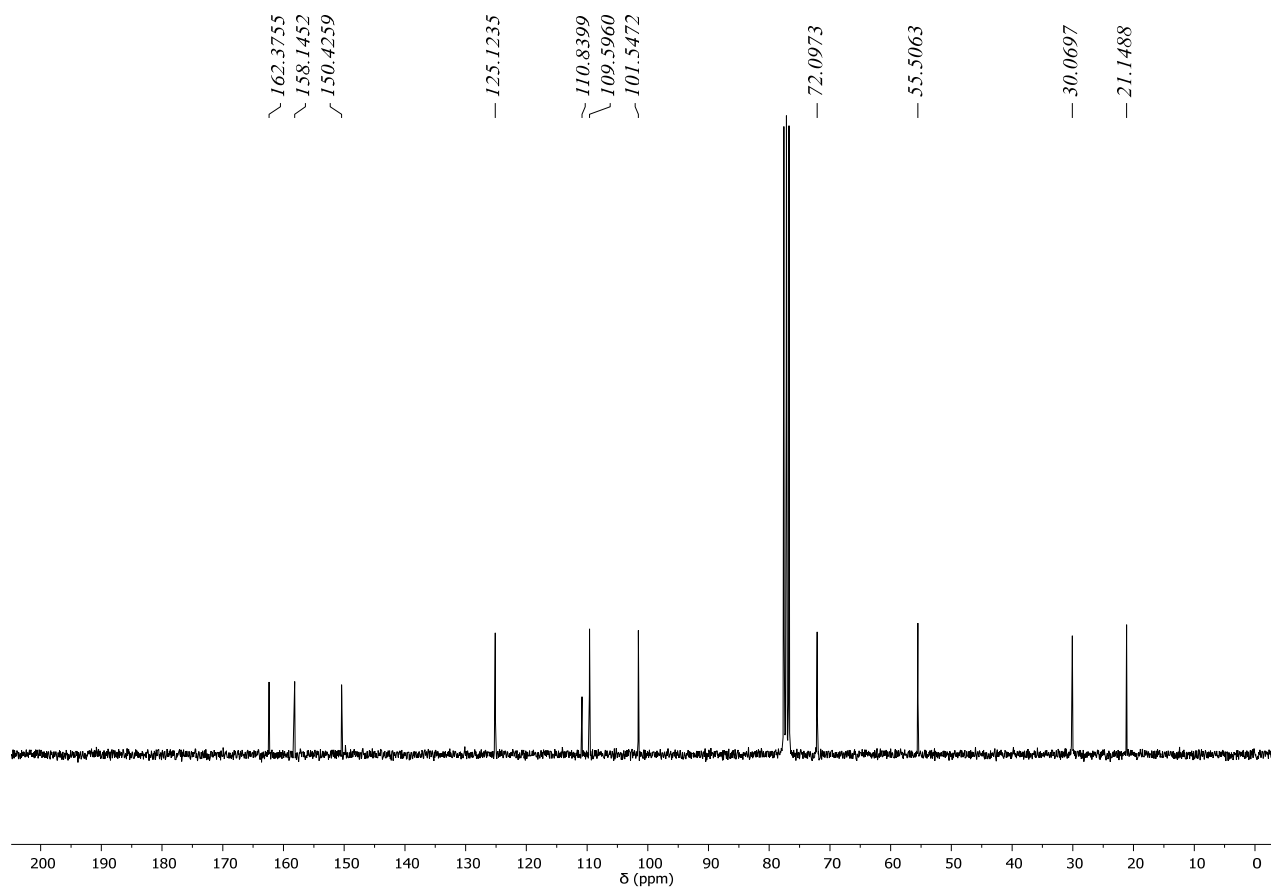

Figure S8: 300 MHz  $^1\text{H}$  (top) and 75 MHz  $^{13}\text{C}\{^1\text{H}\}$  (bottom) NMR spectra of compound (E)-11b in  $\text{CDCl}_3$ .

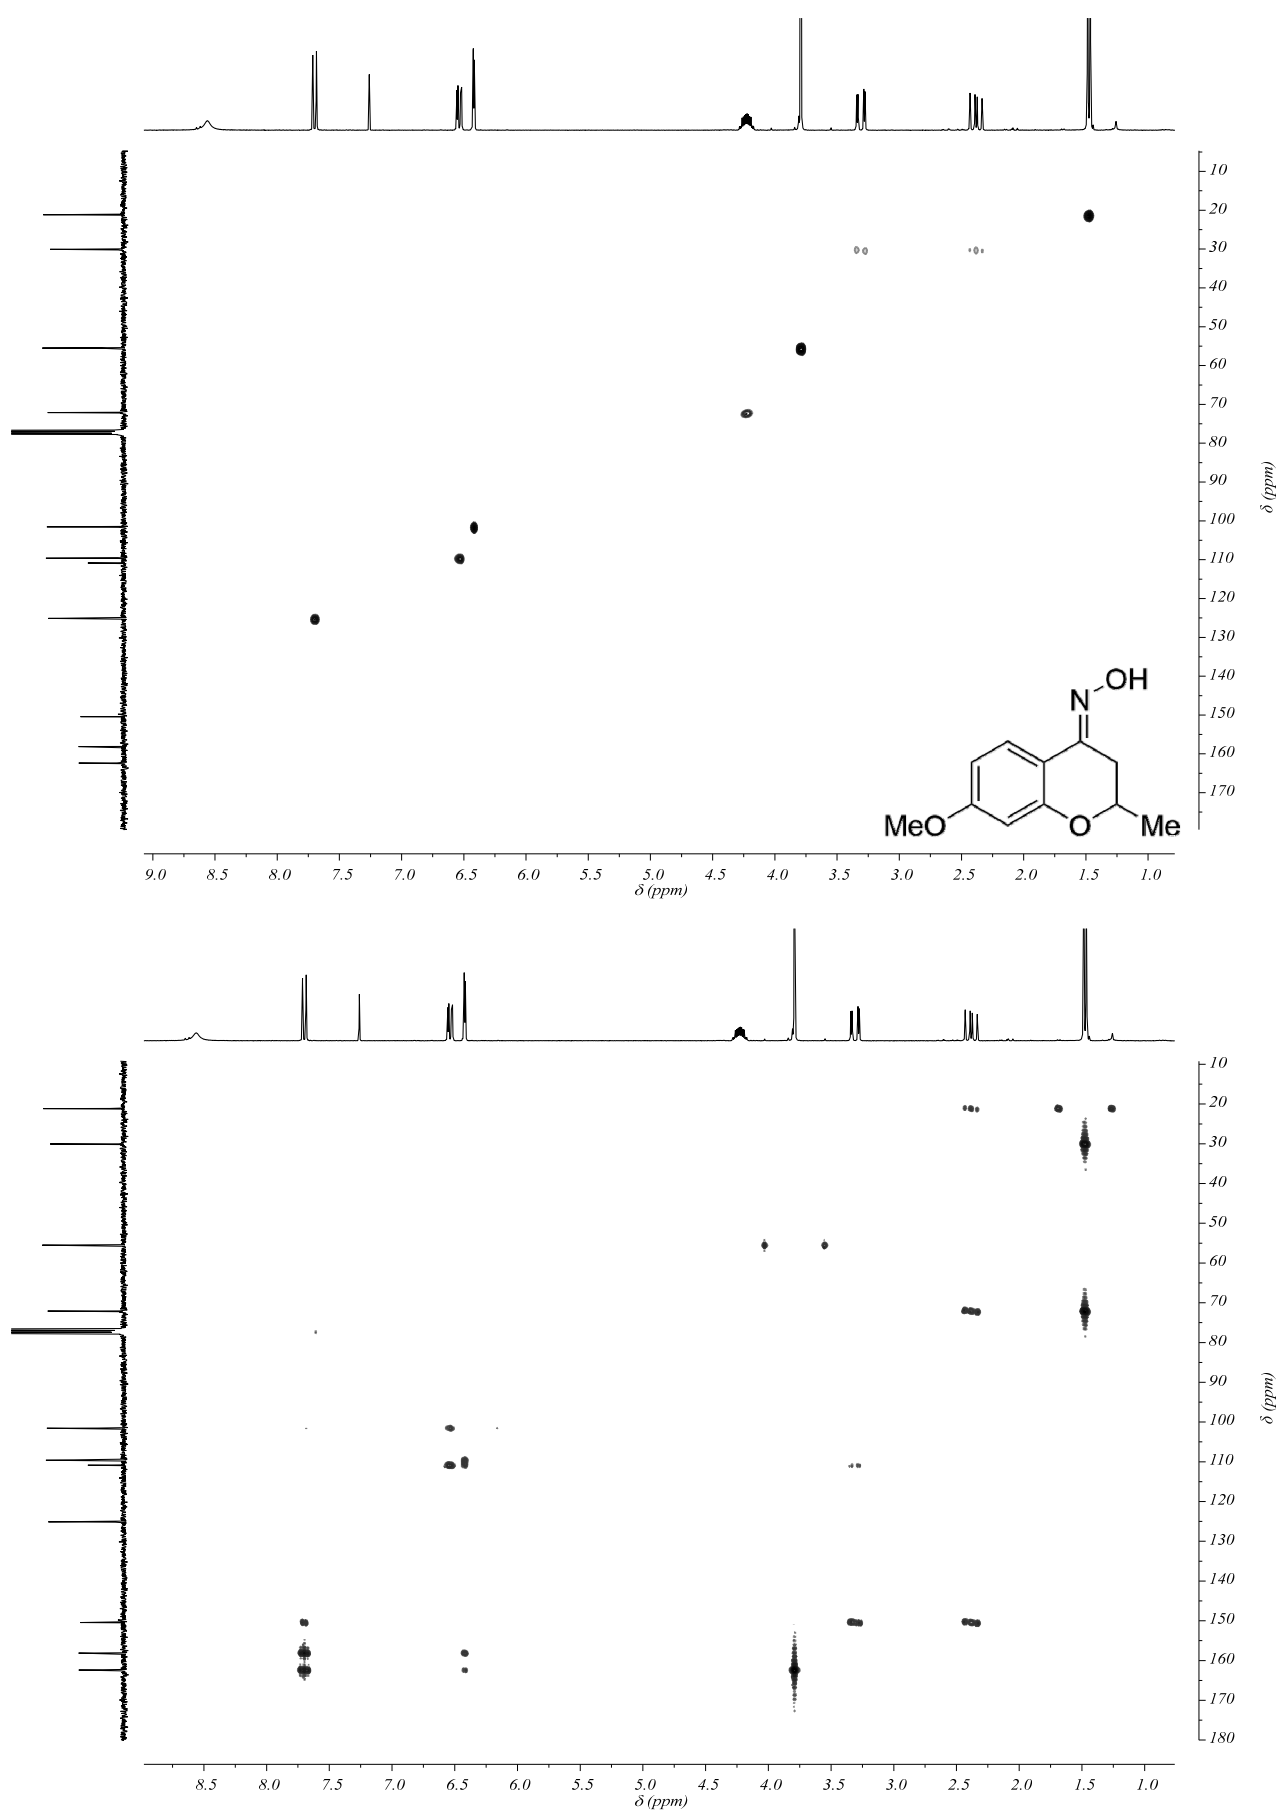

**Figure S9:** HSQC (top) and HMBC (bottom) spectra of compound (*E*)-11b in CDCl<sub>3</sub>.

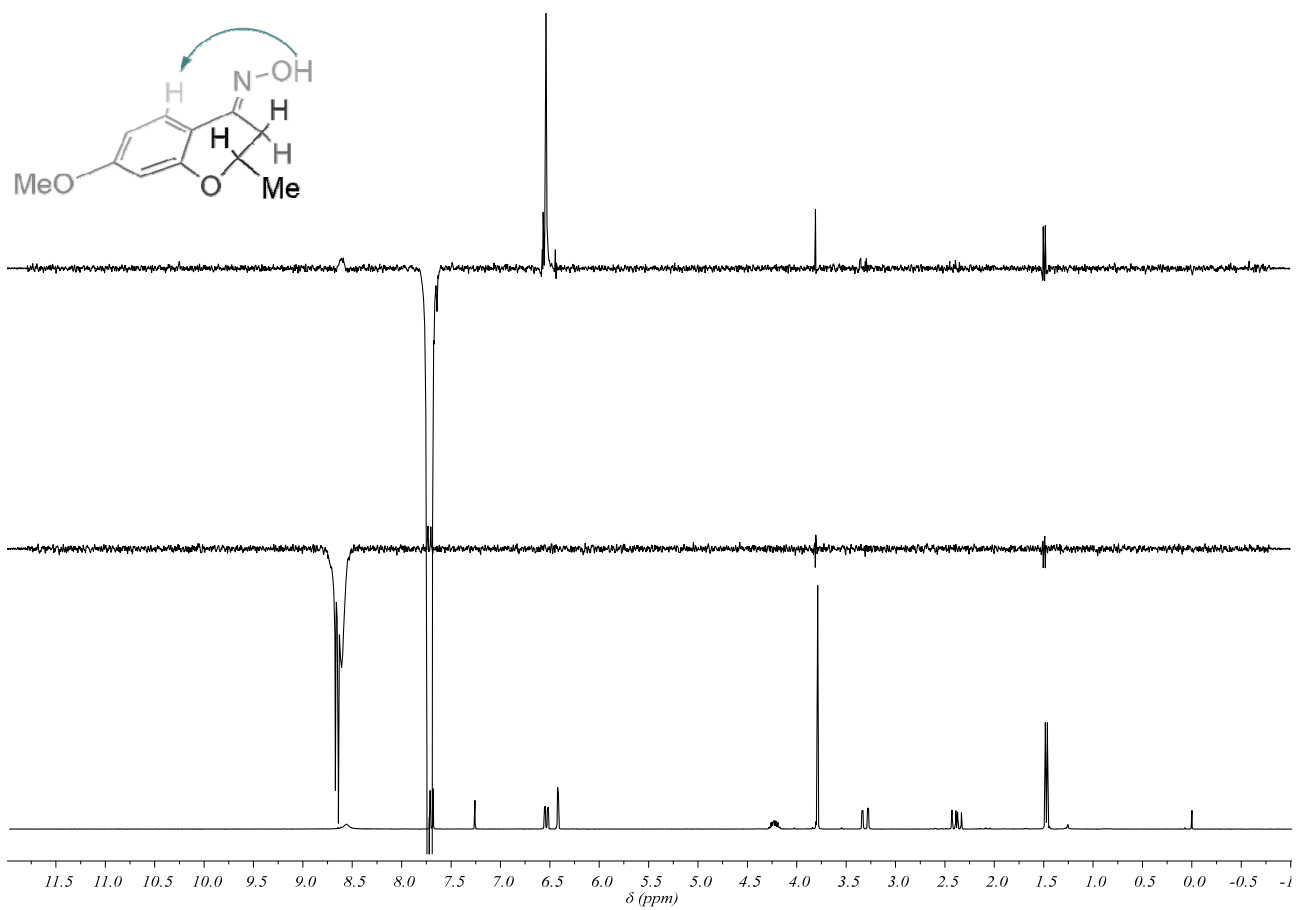

**Figure S10:** NOE spectra of compound **(E)-11b** in CDCl<sub>3</sub>.

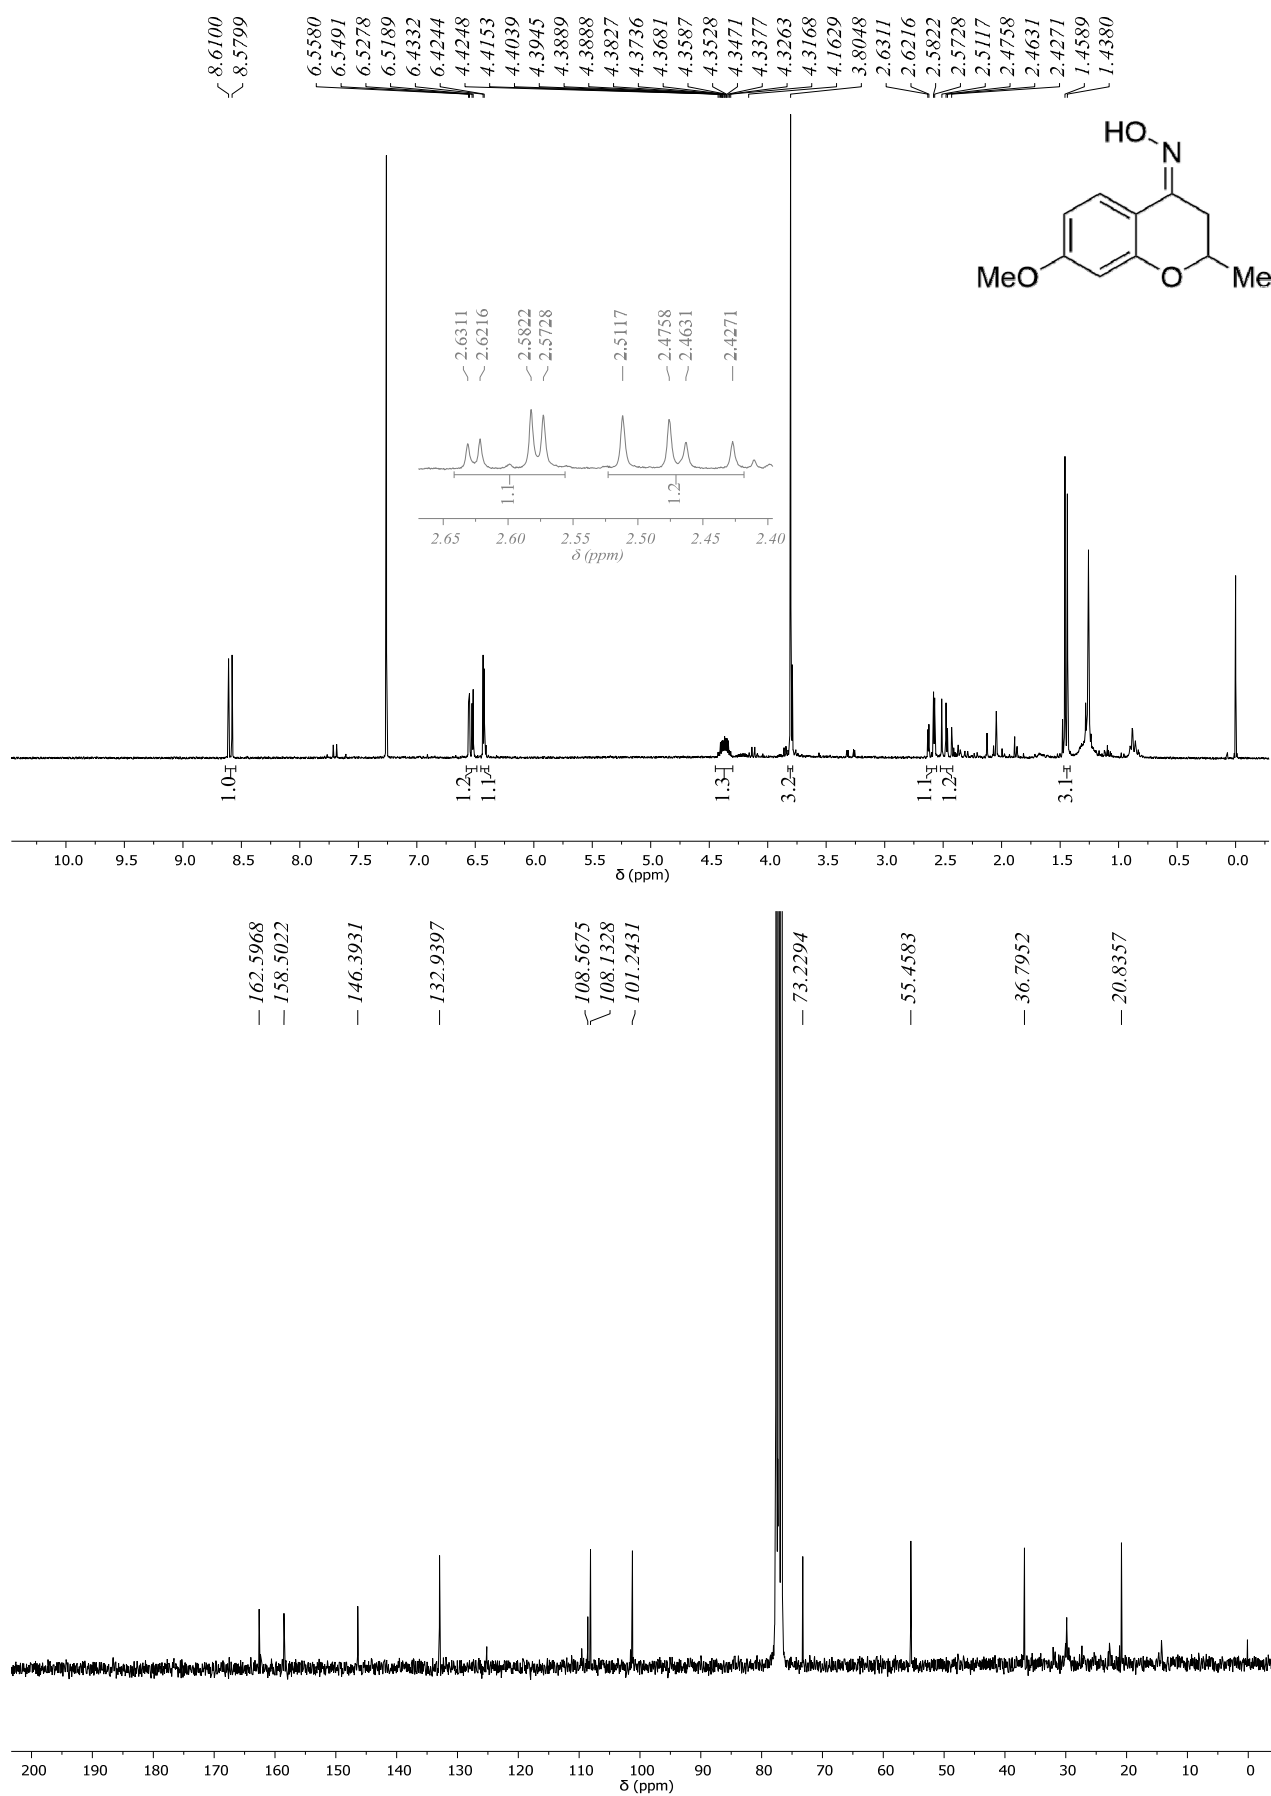

Figure S11: 300 MHz <sup>1</sup>H (top) and 75 MHz <sup>13</sup>C{<sup>1</sup>H} (bottom) NMR spectra of compound (Z)-11b in CDCl<sub>3</sub>.

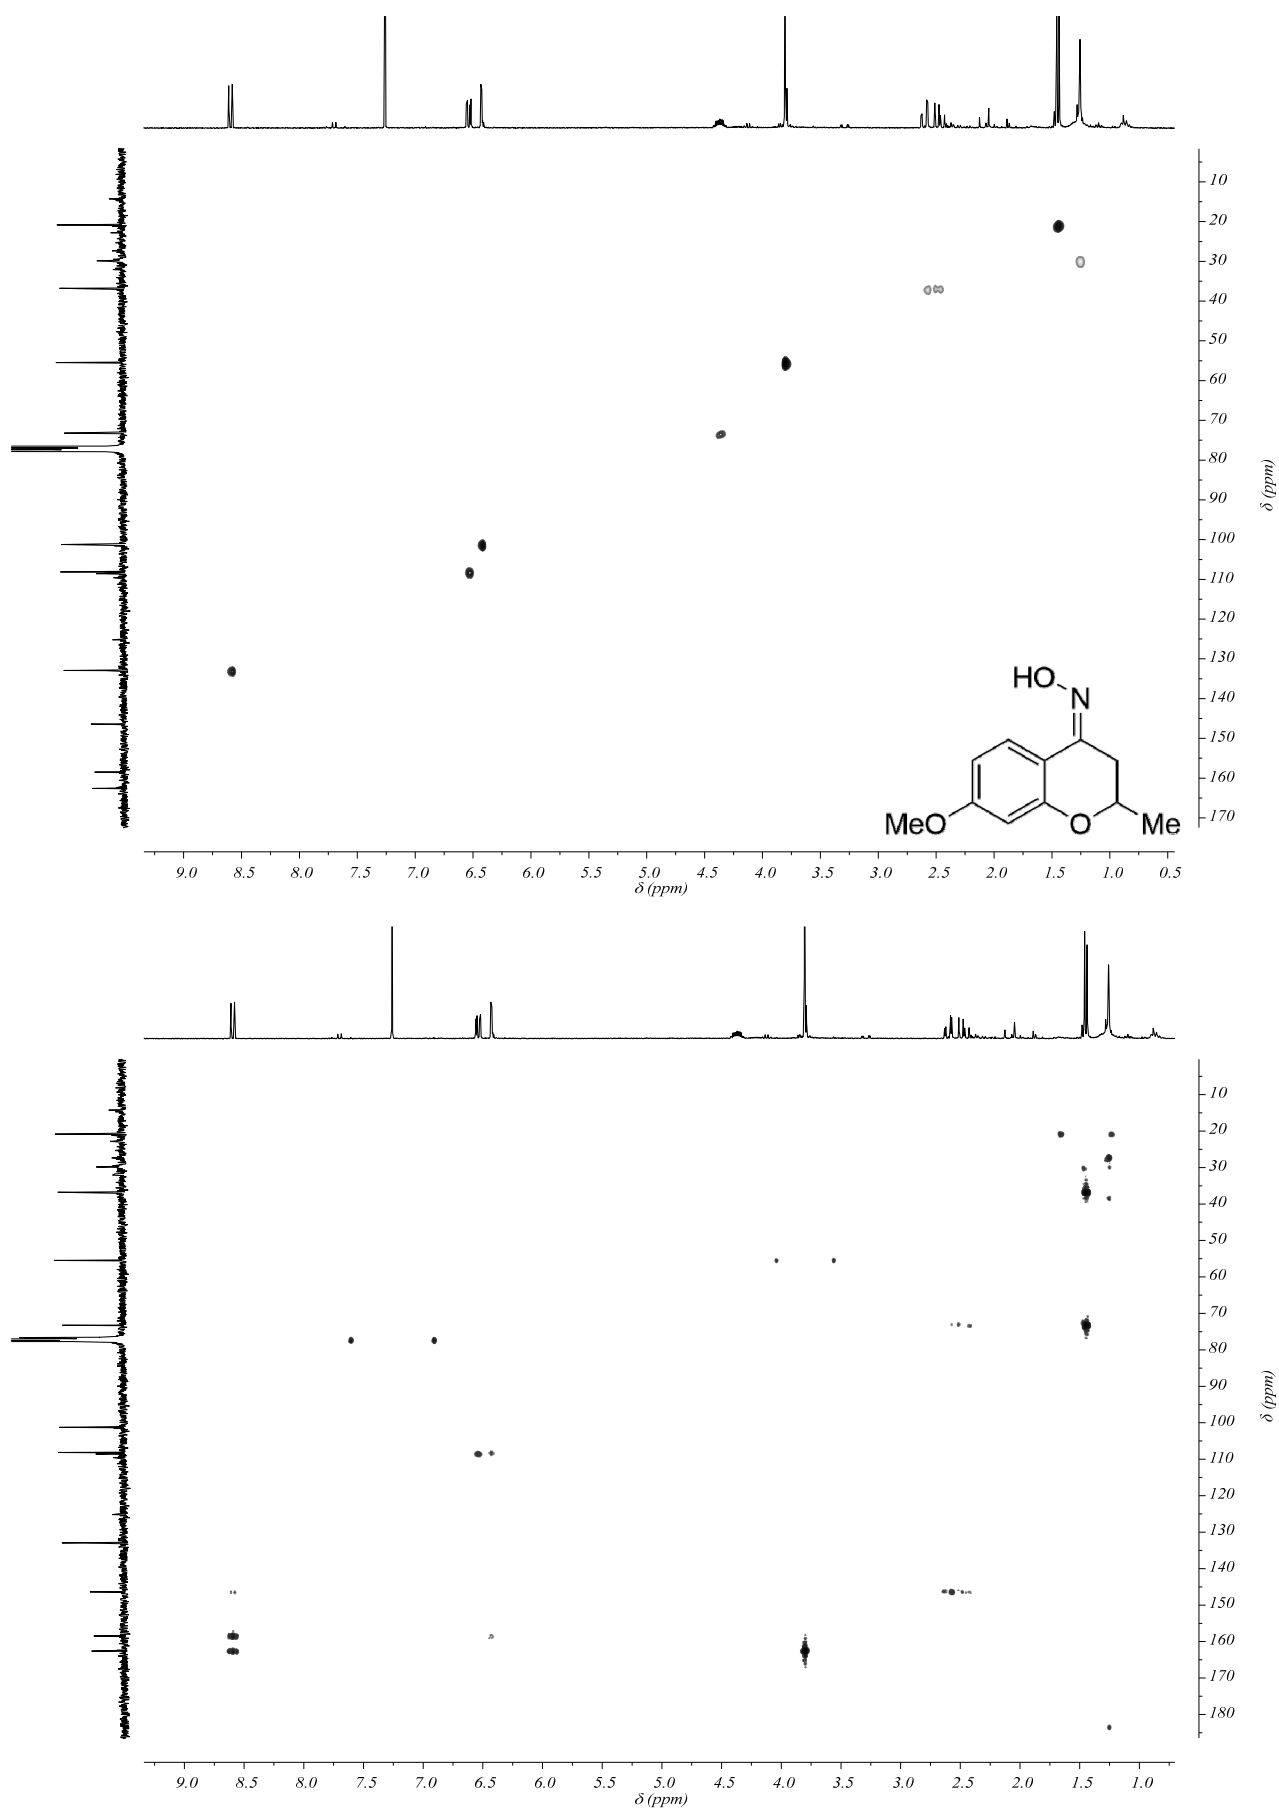

Figure S12: HSQC (top) and HMBC (bottom) spectra of compound (Z)-11b in CDCl<sub>3</sub>.

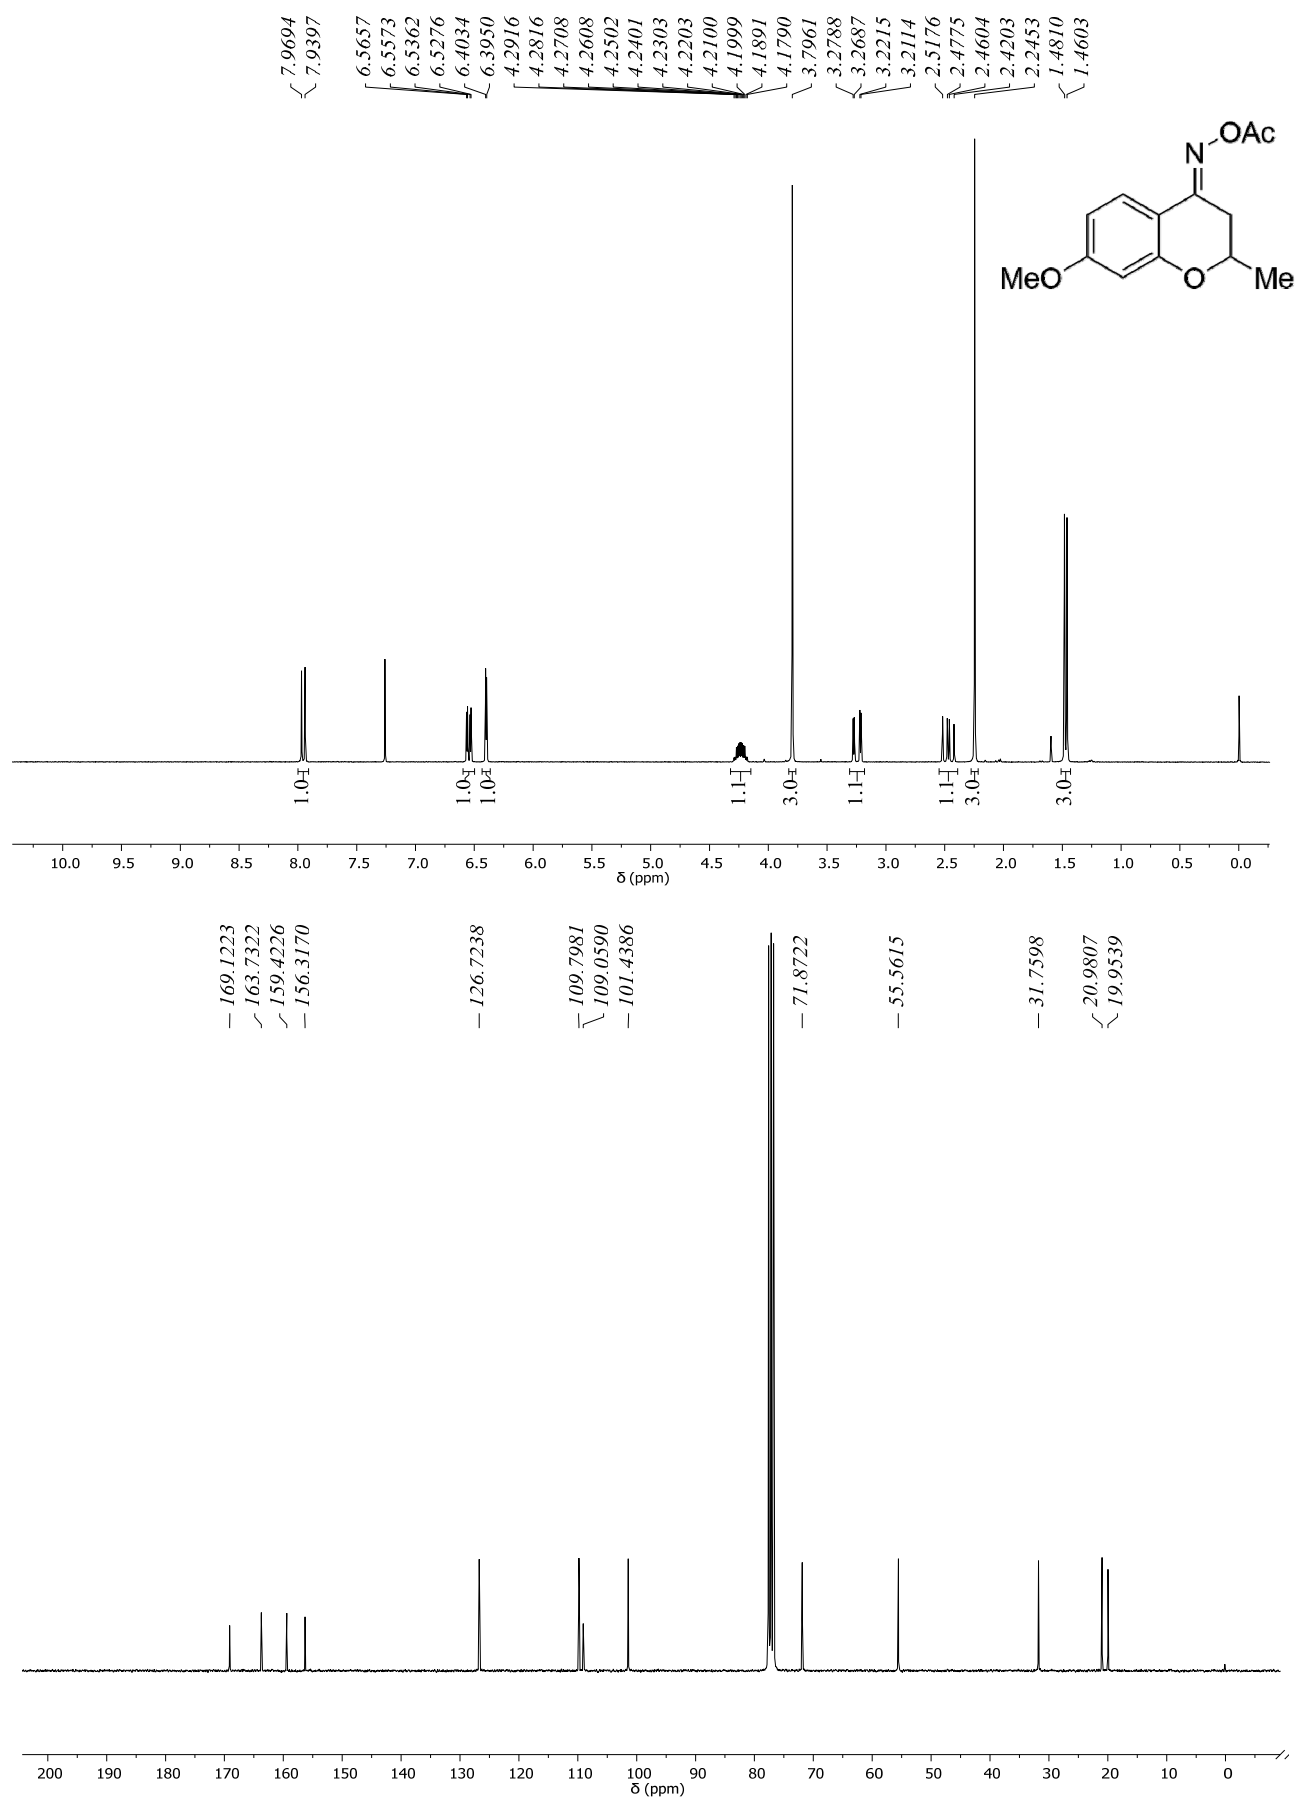

**Figure S13:** 300 MHz <sup>1</sup>H (top) and 75 MHz <sup>13</sup>C{<sup>1</sup>H} (bottom) NMR spectra of compound **11c** in CDCl<sub>3</sub>.



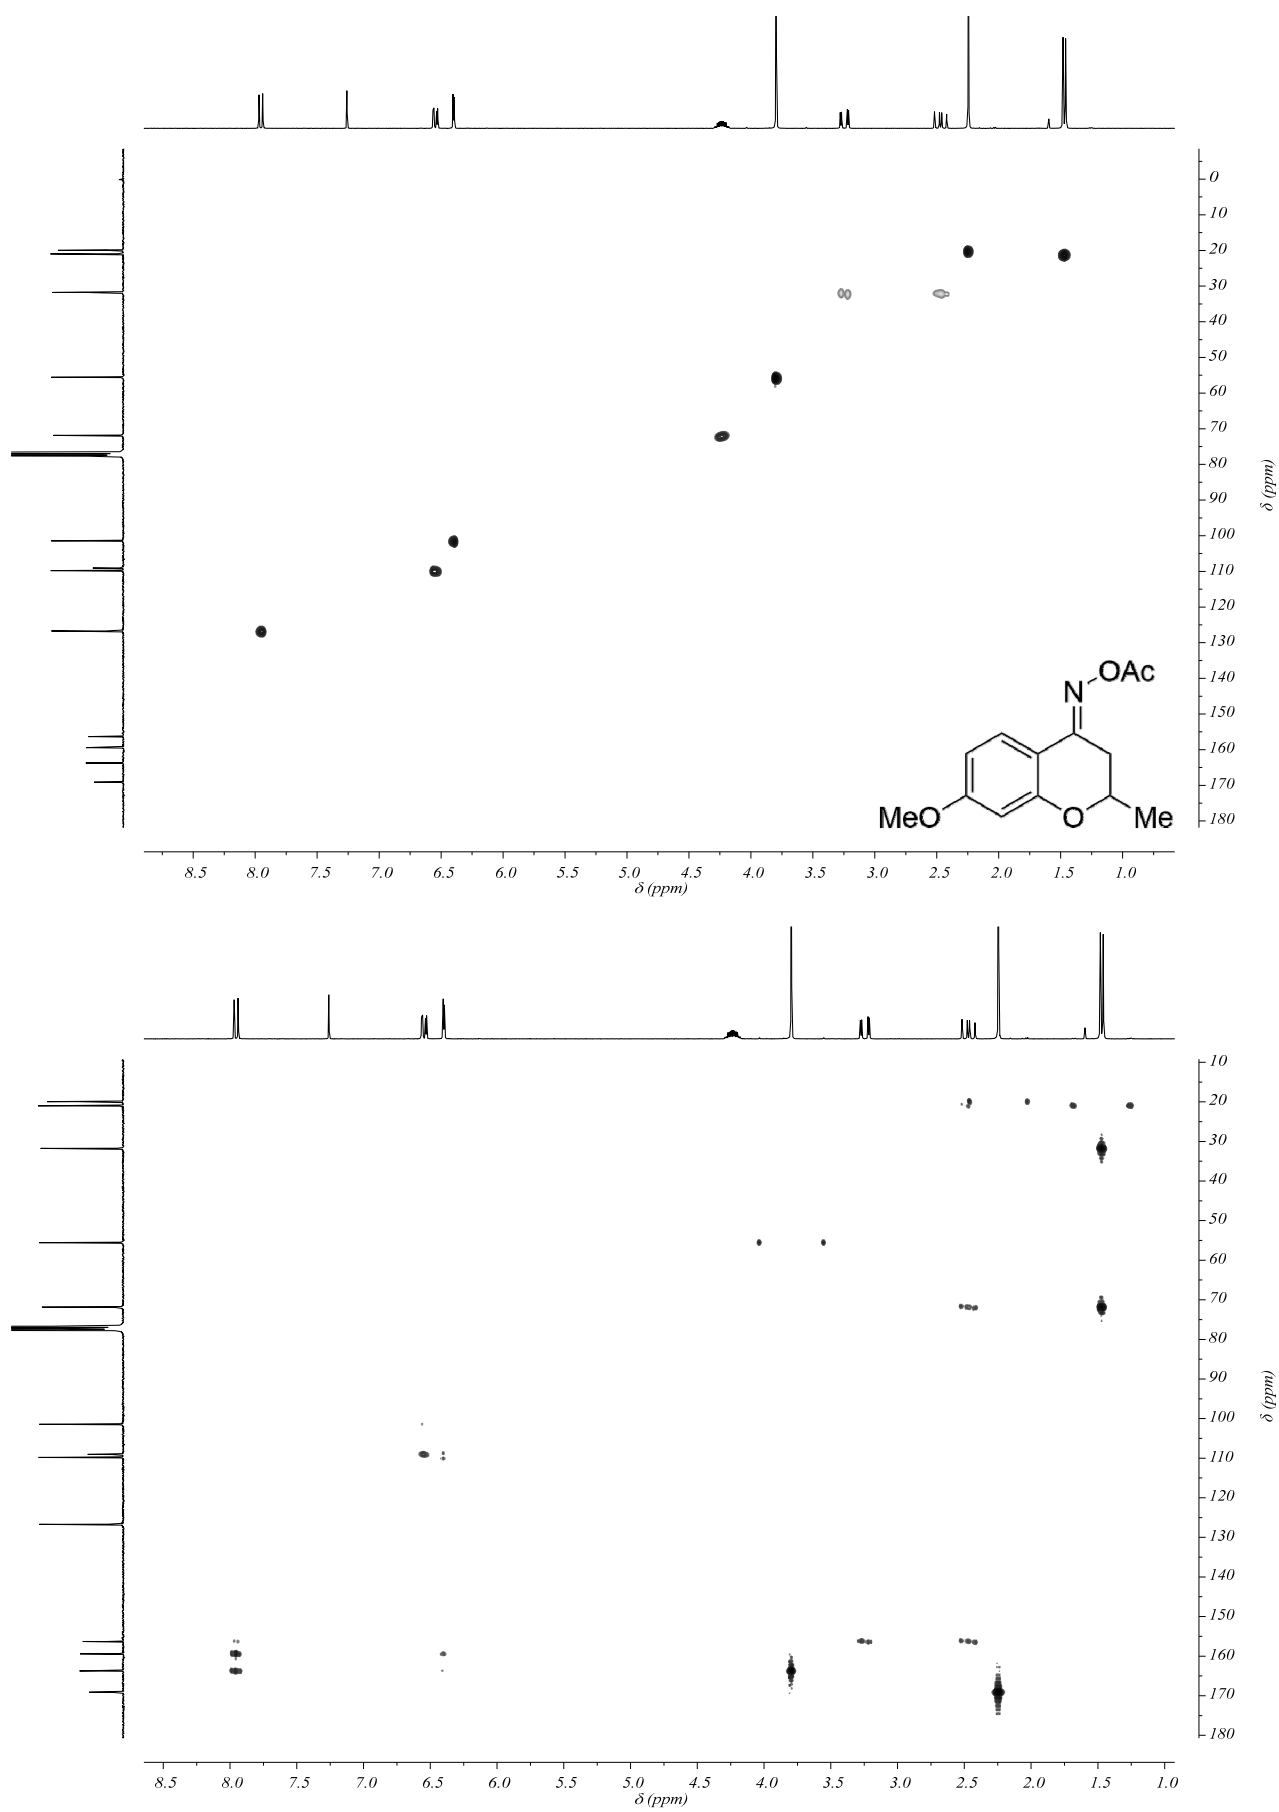

**Figure S14:** HSQC (top) and HMBC (bottom) spectra of compound **11c** in CDCl<sub>3</sub>.

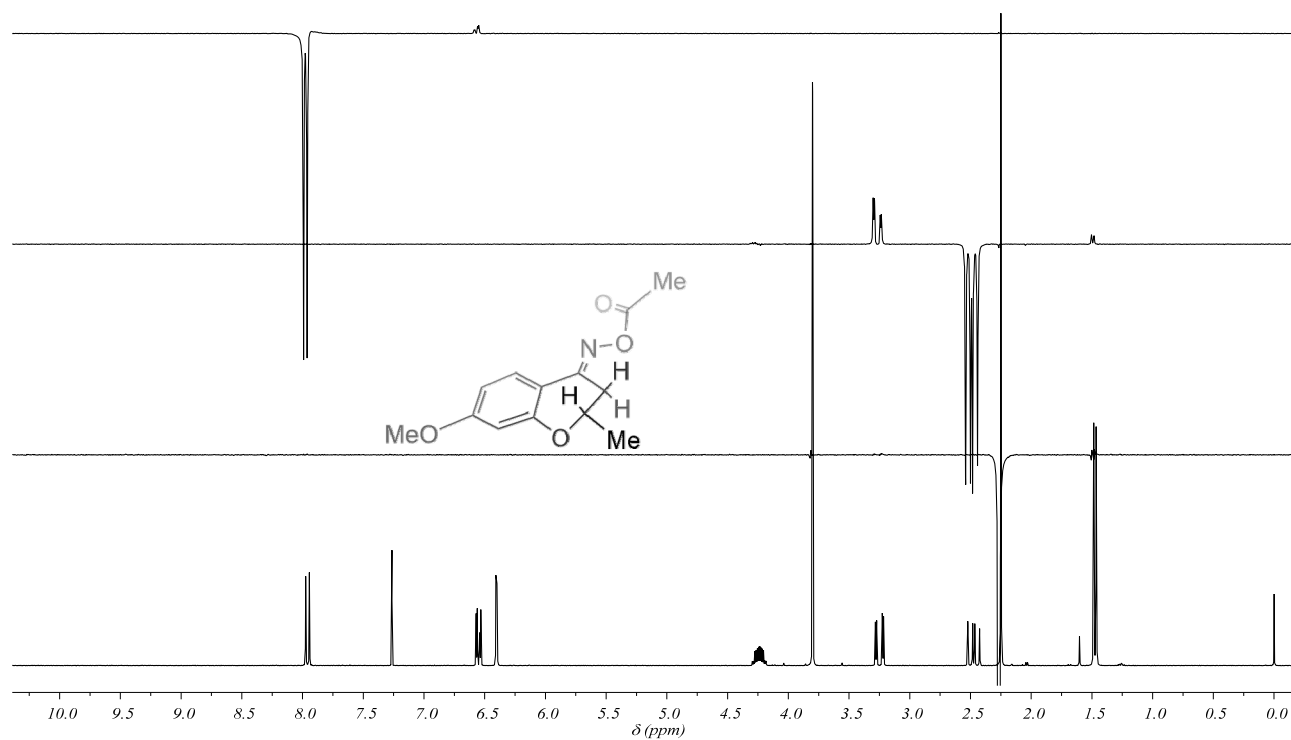

**Figure S15:** NOE spectra of compound **11c** in  $\text{CDCl}_3$ .

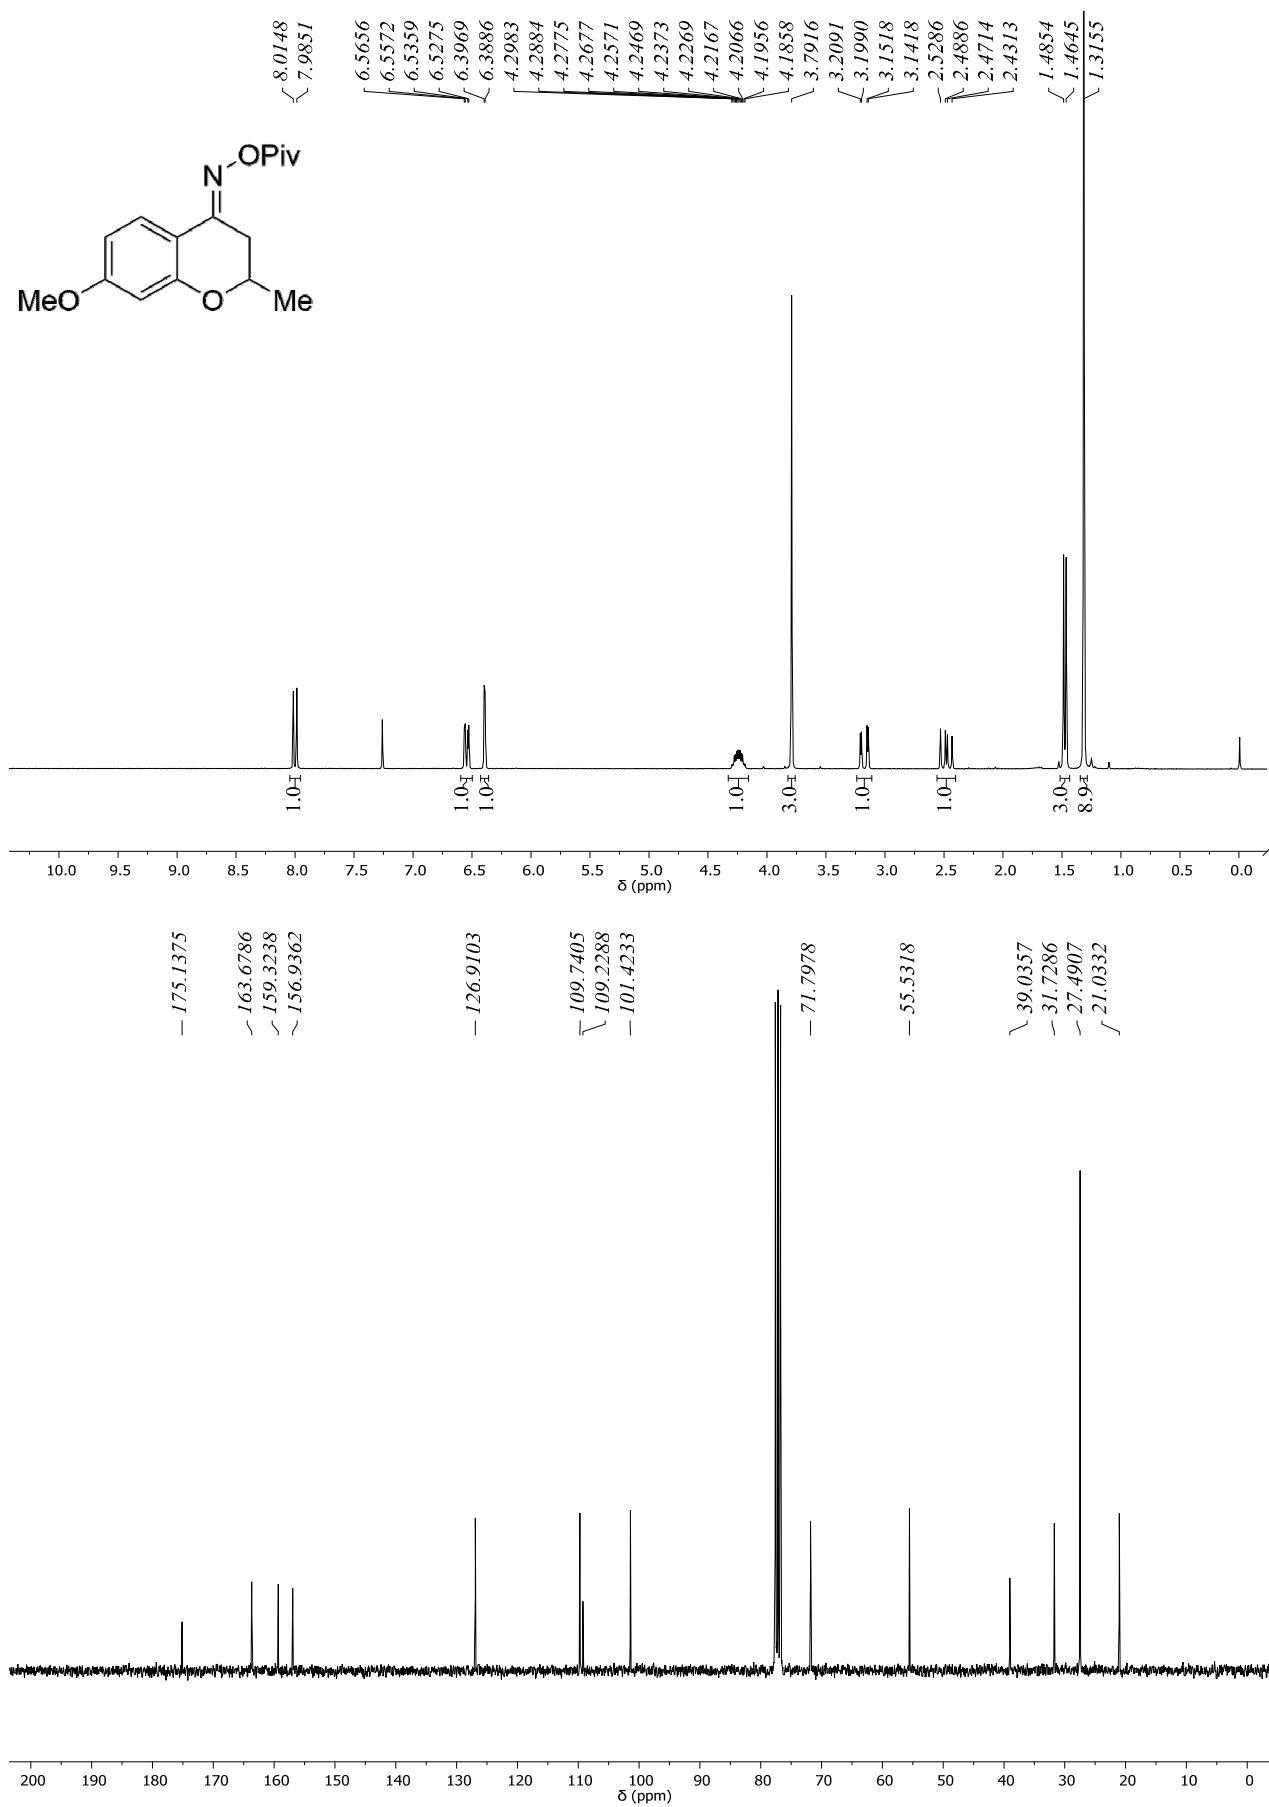

Figure S16: 300 MHz <sup>1</sup>H (top) and 75 MHz <sup>13</sup>C {<sup>1</sup>H} (bottom) NMR spectra of compound **11d** in CDCl<sub>3</sub>.

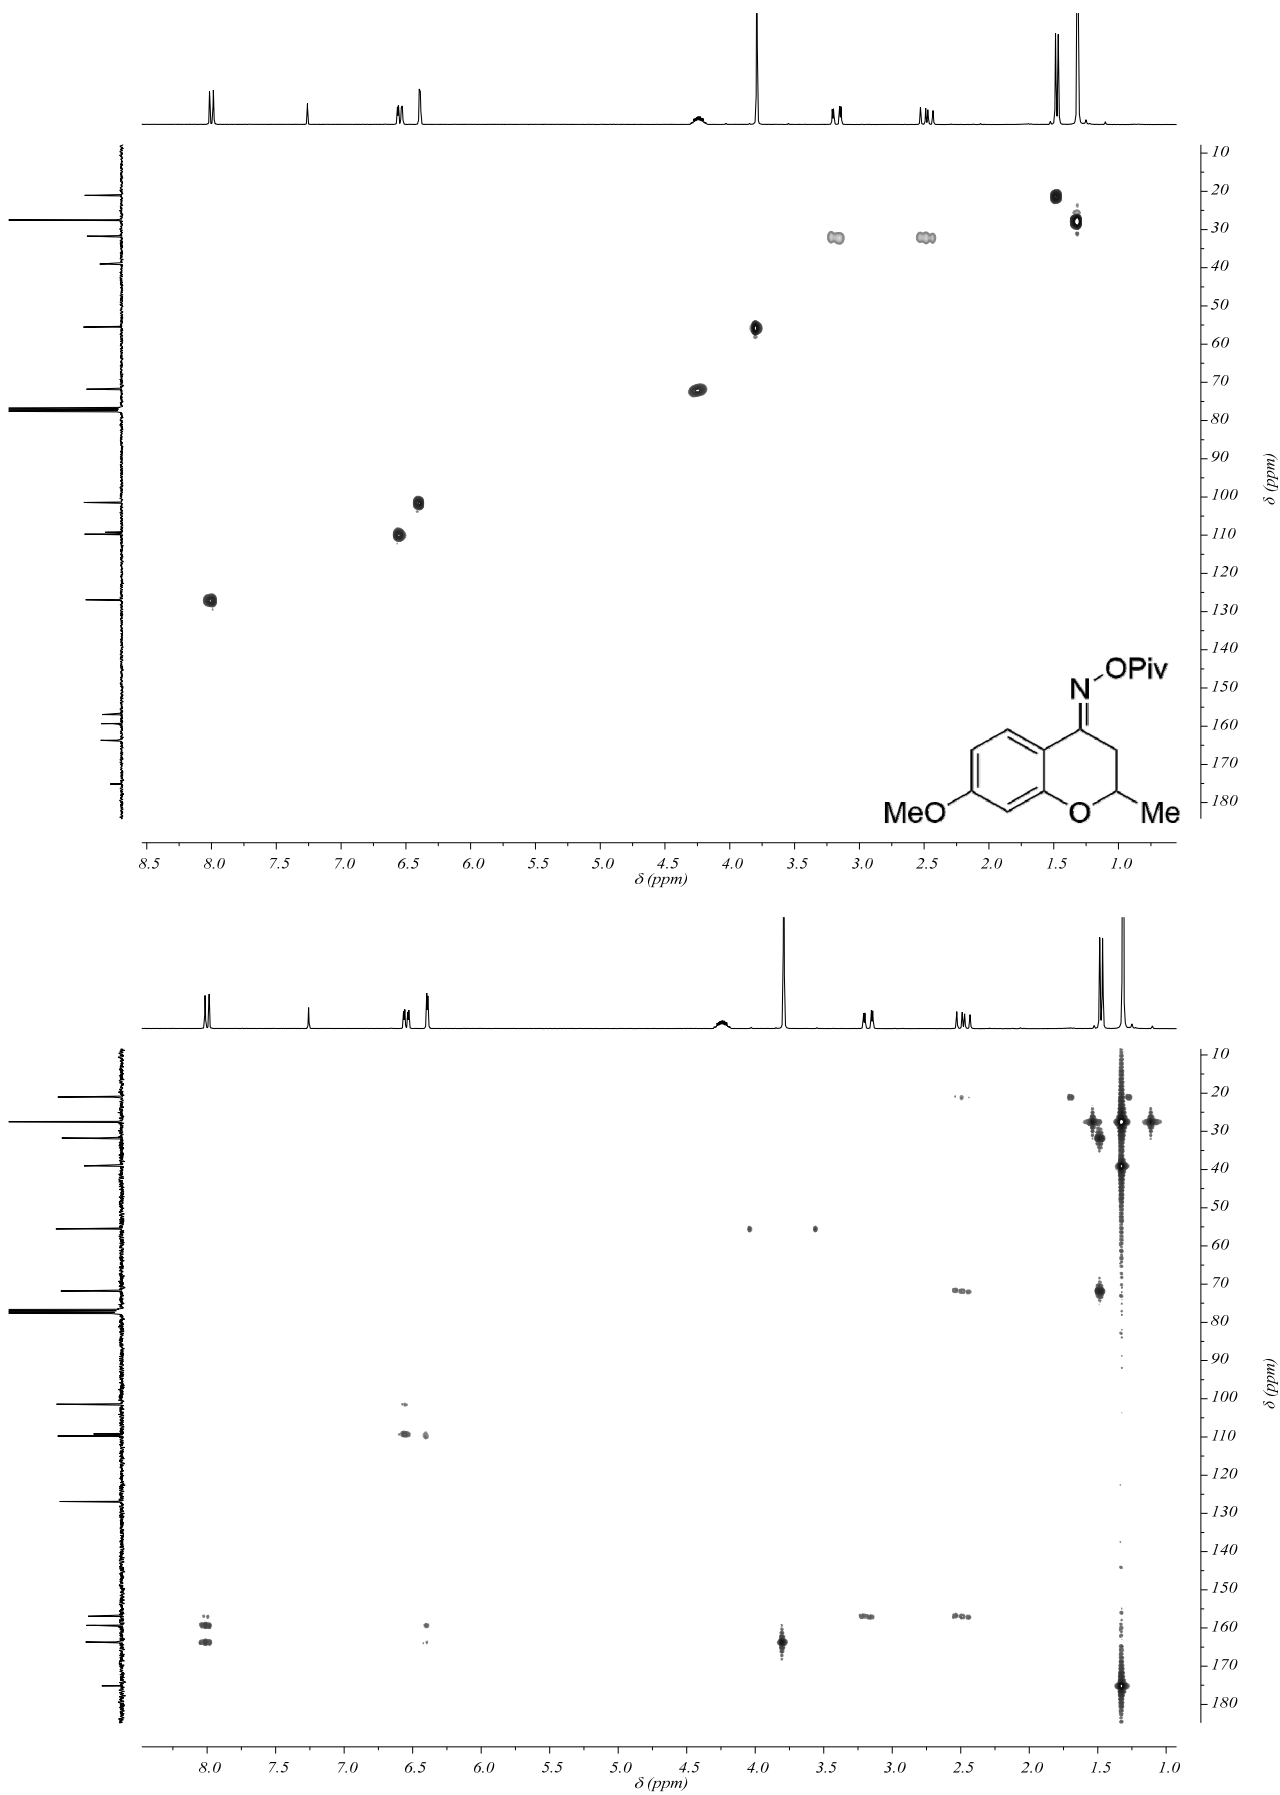

**Figure S17:** HSQC (top) and HMBC (bottom) spectra of compound **11d** in  $\text{CDCl}_3$ .

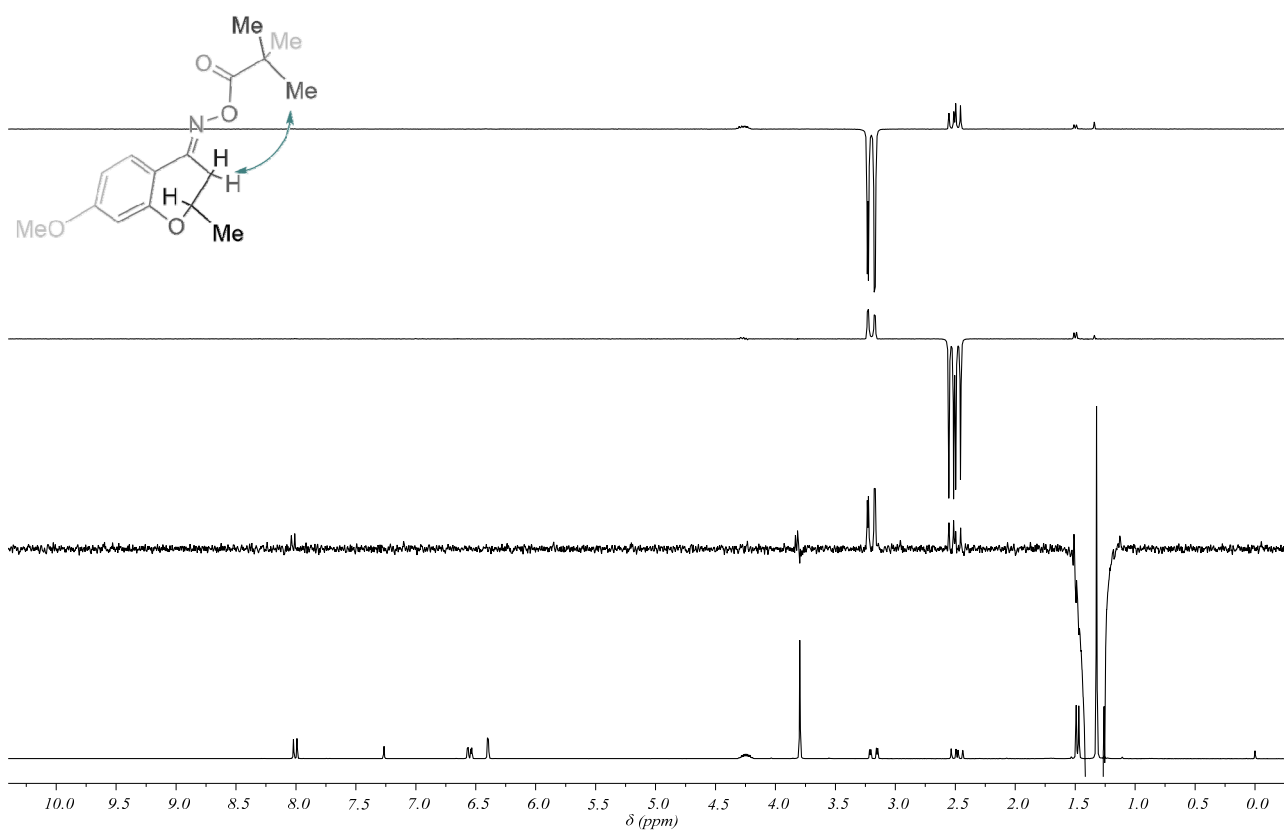

**Figure S18:** NOE spectra of compound **11d** in CDCl<sub>3</sub>.

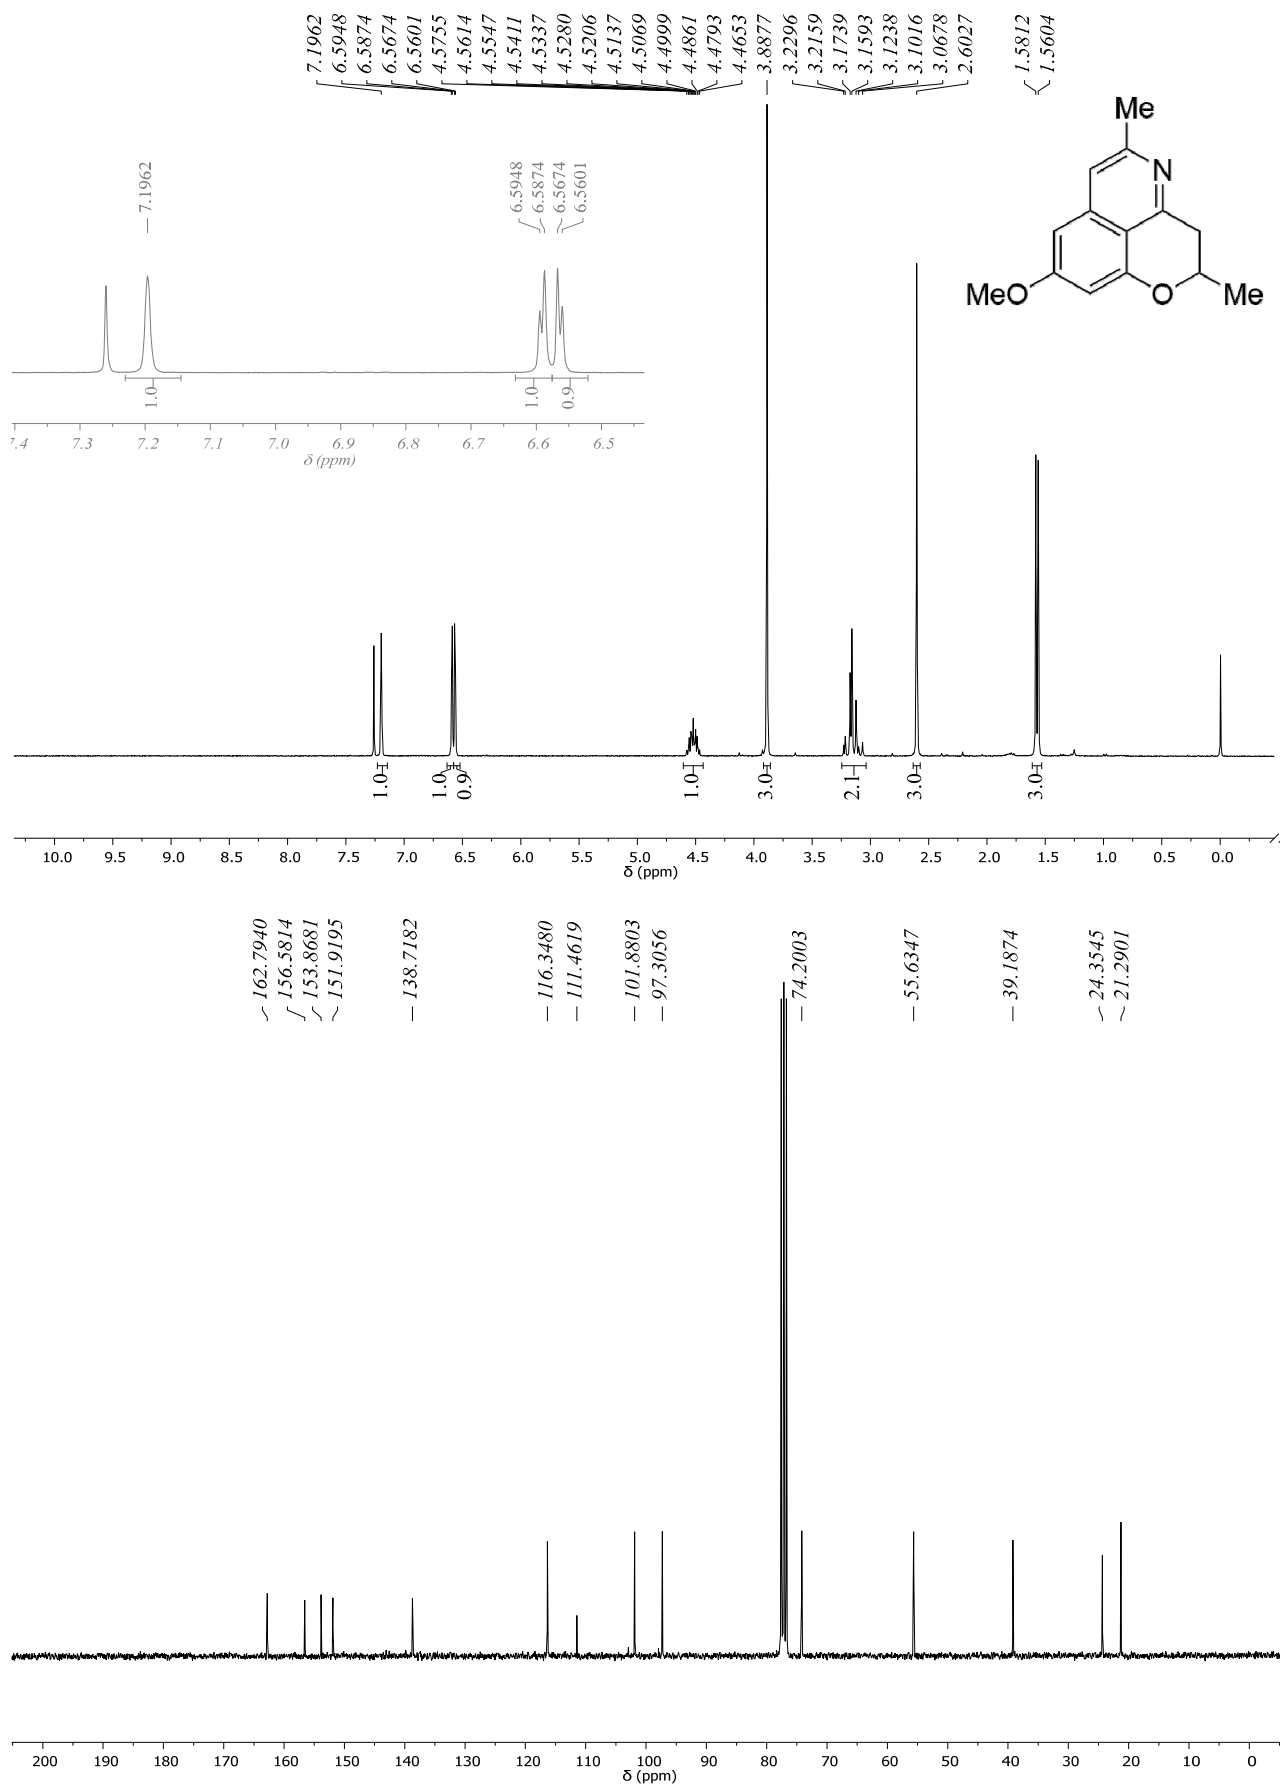

Figure S19: 300 MHz <sup>1</sup>H (top) and 75 MHz <sup>13</sup>C {<sup>1</sup>H} (bottom) NMR spectra of compound 17 in CDCl<sub>3</sub>.

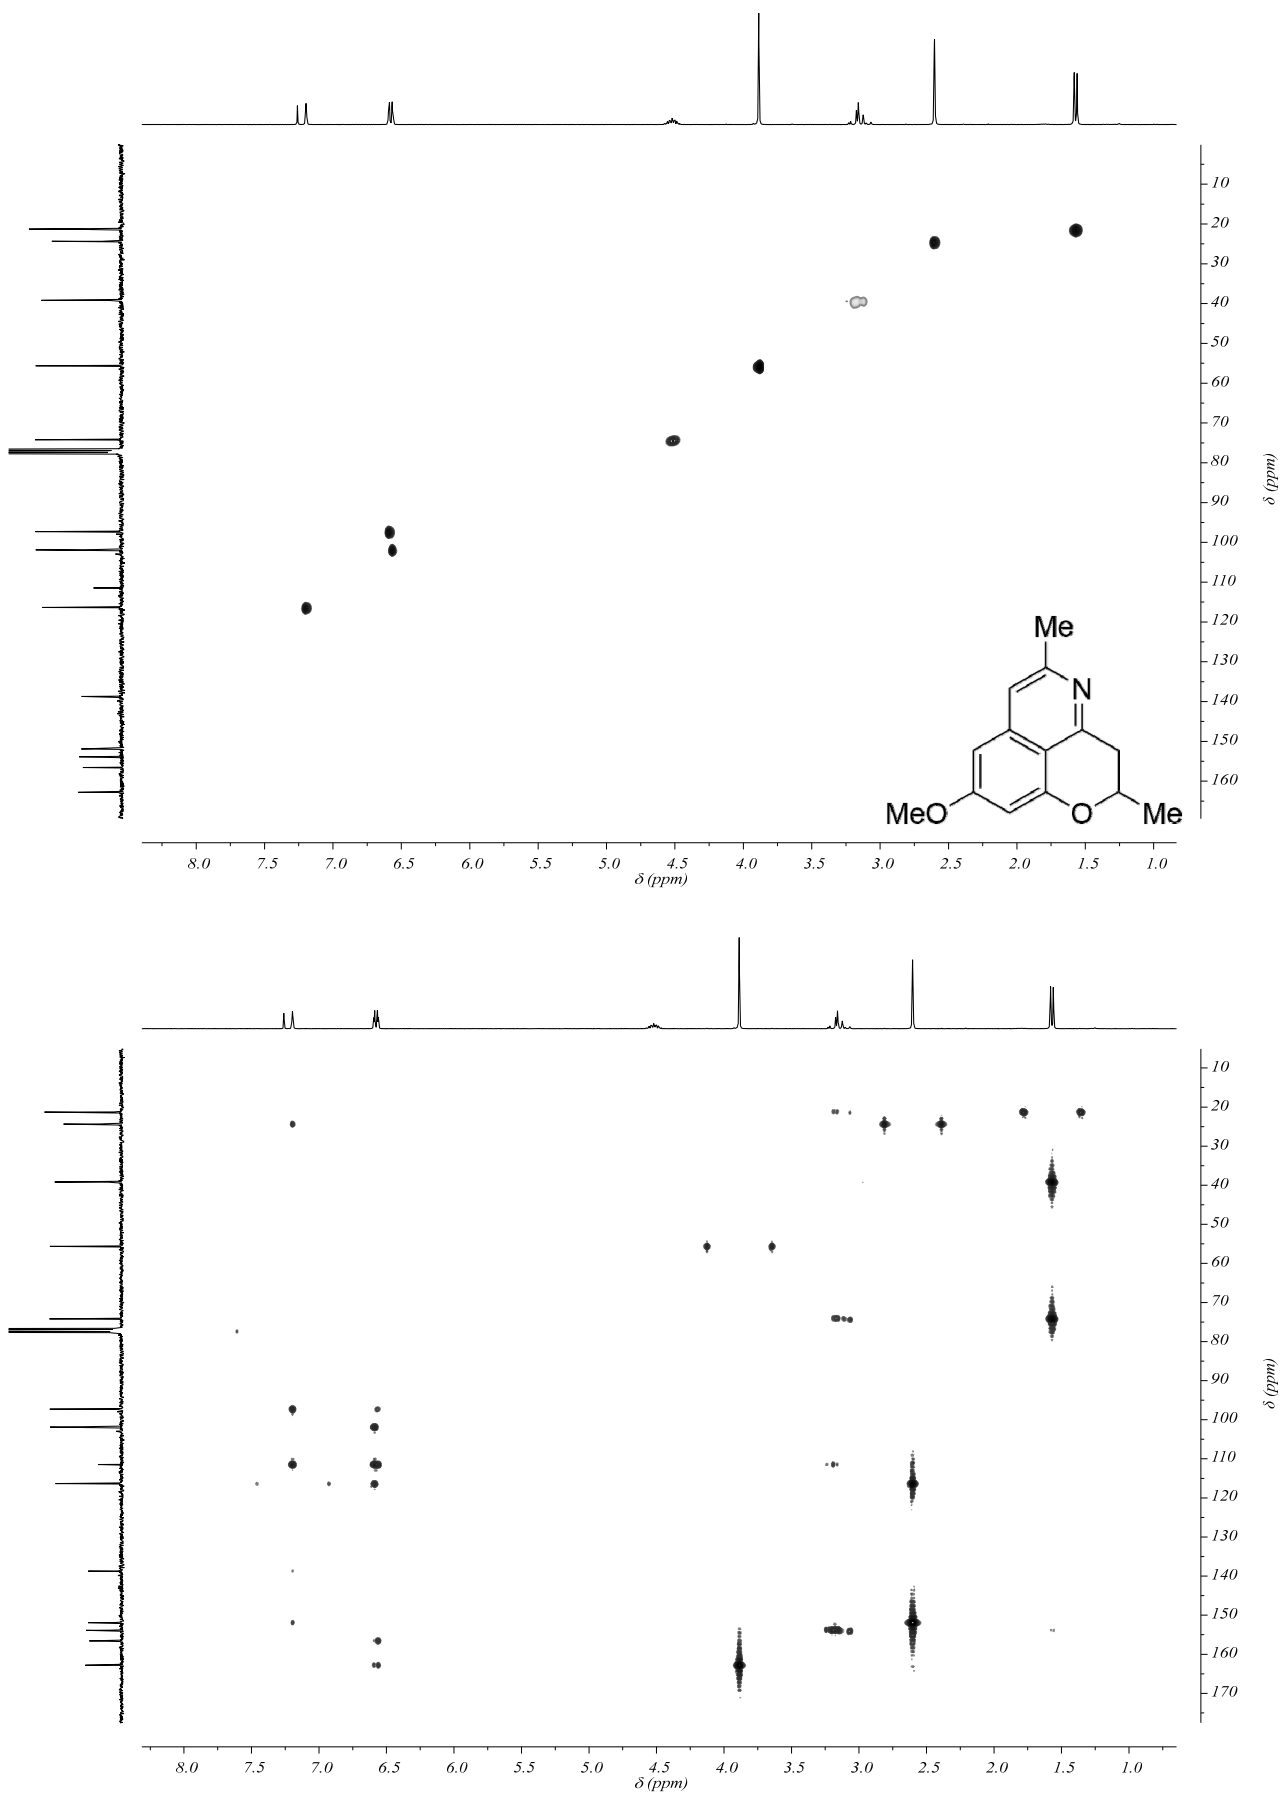

**Figure S20:** HSQC (top) and HMBC (bottom) spectra of compound 17 in CDCl<sub>3</sub>.

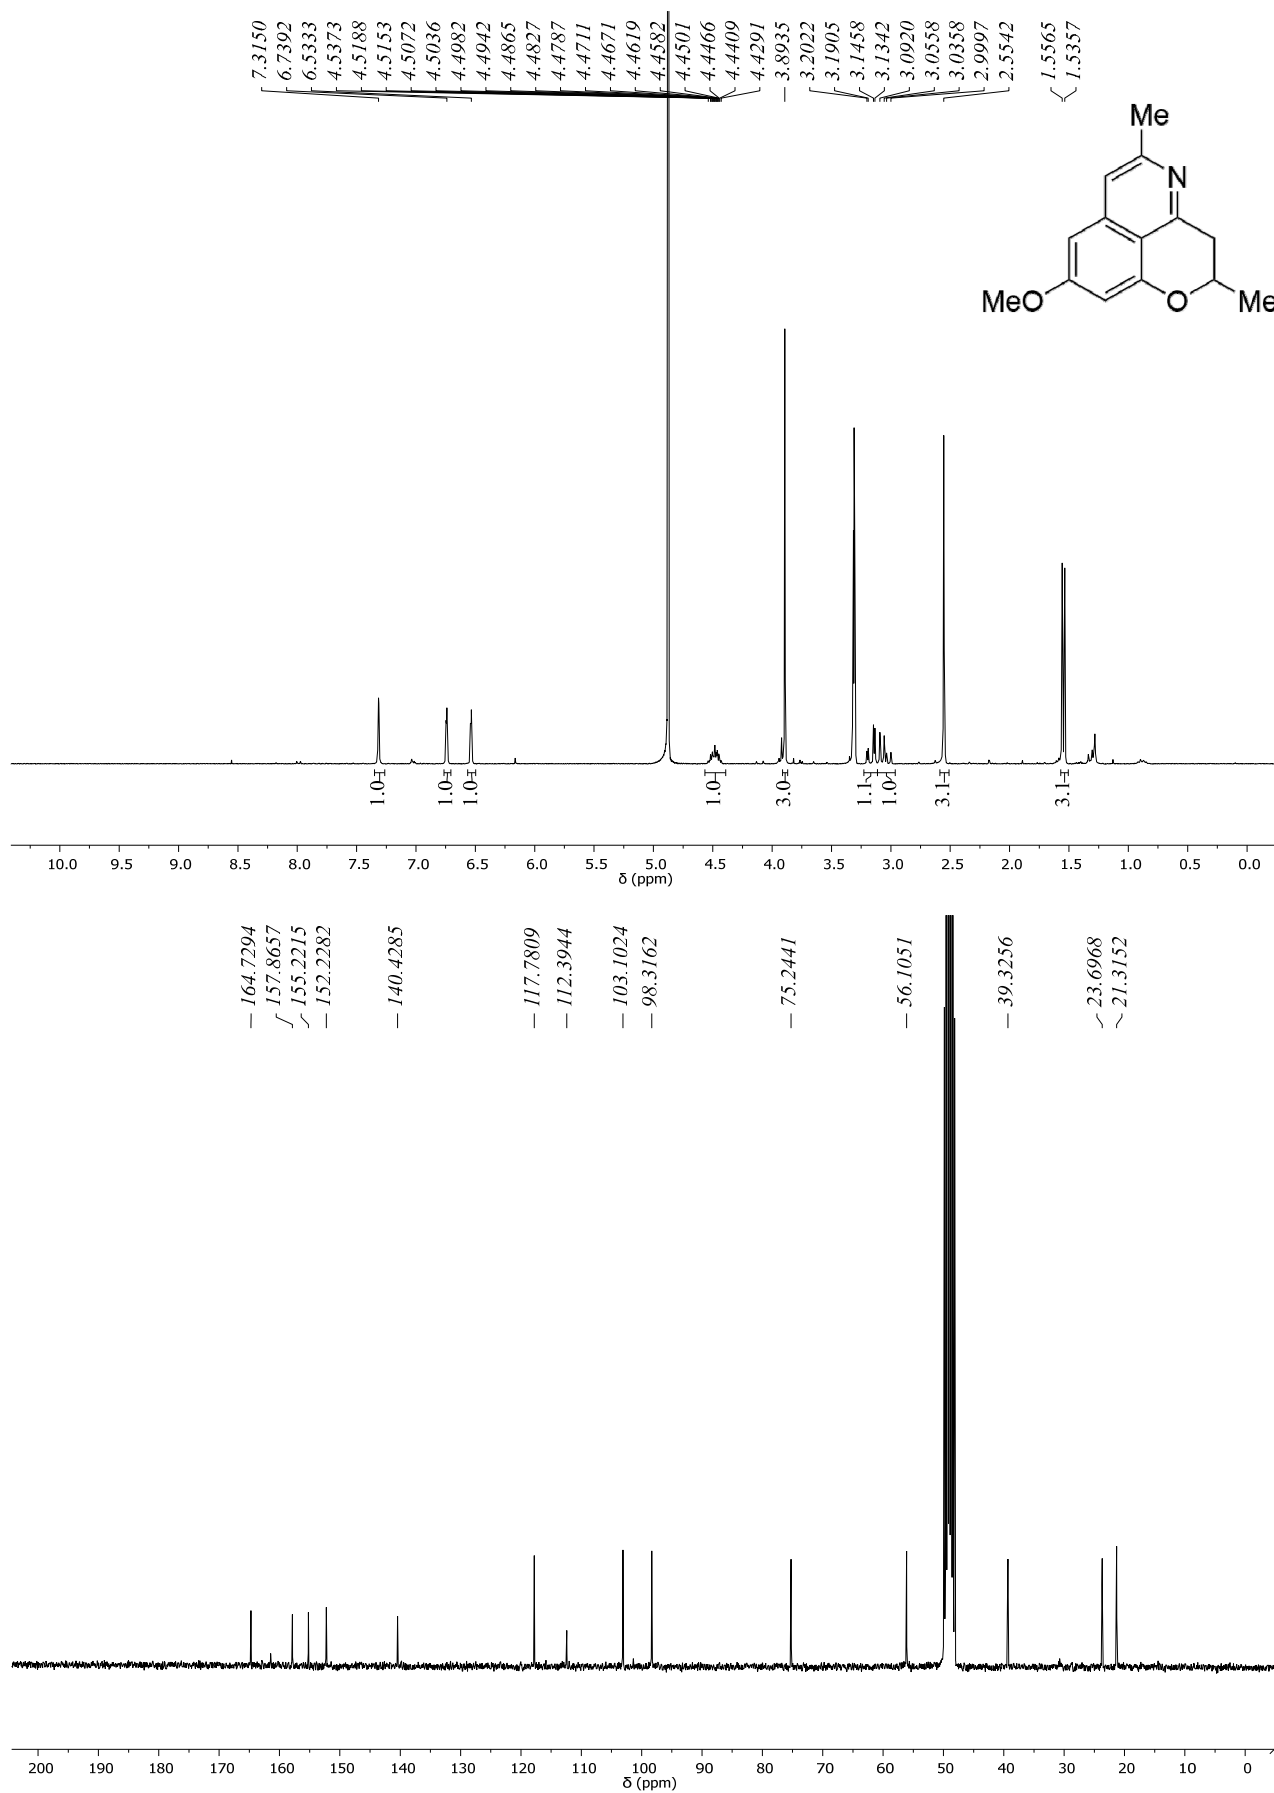

**Figure S21:** 300 MHz <sup>1</sup>H (top) and 75 MHz <sup>13</sup>C {<sup>1</sup>H} (bottom) NMR spectra of compound 17 in CD<sub>3</sub>OD.



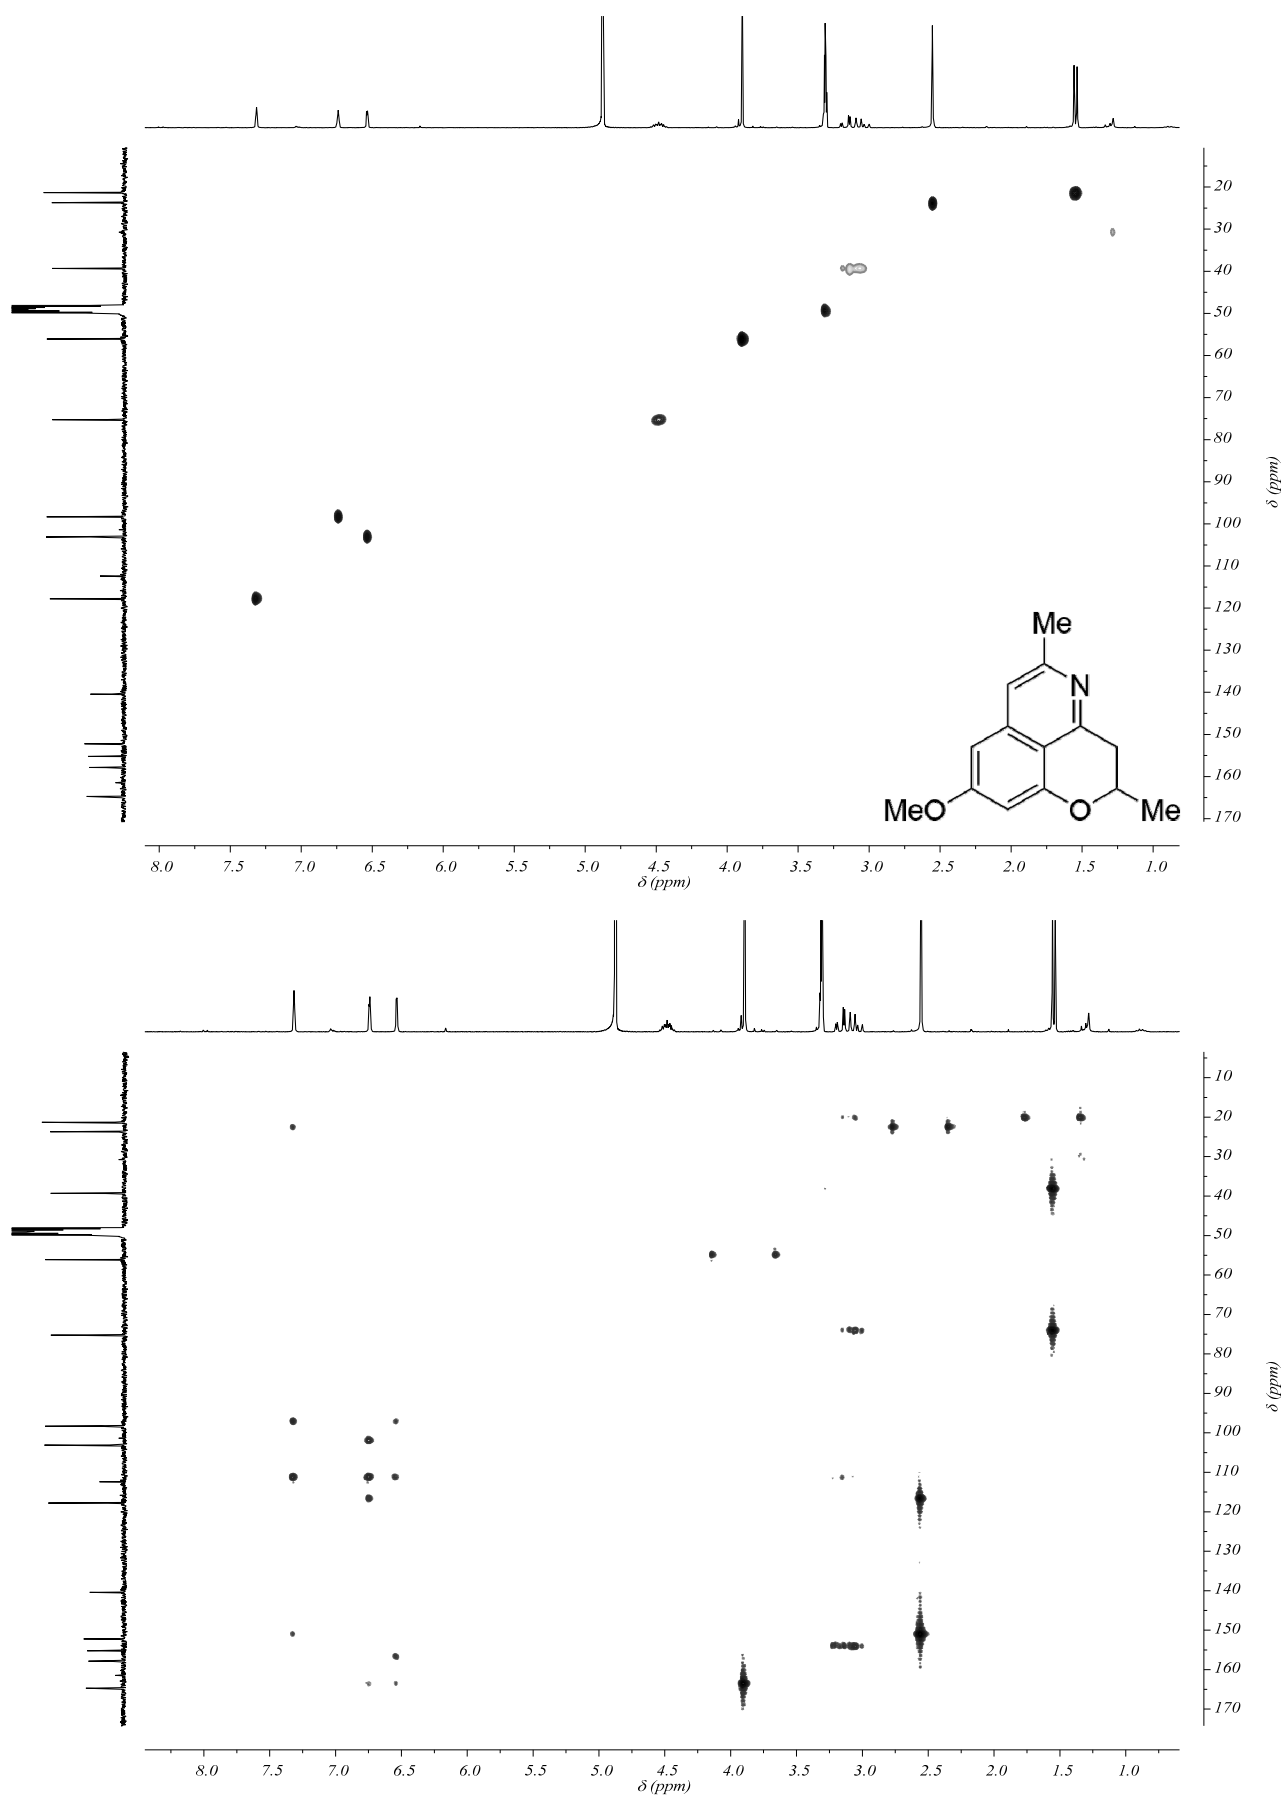

**Figure S22:** HSQC (top) and HMBC (bottom) spectra of compound 17 in CD<sub>3</sub>OD.

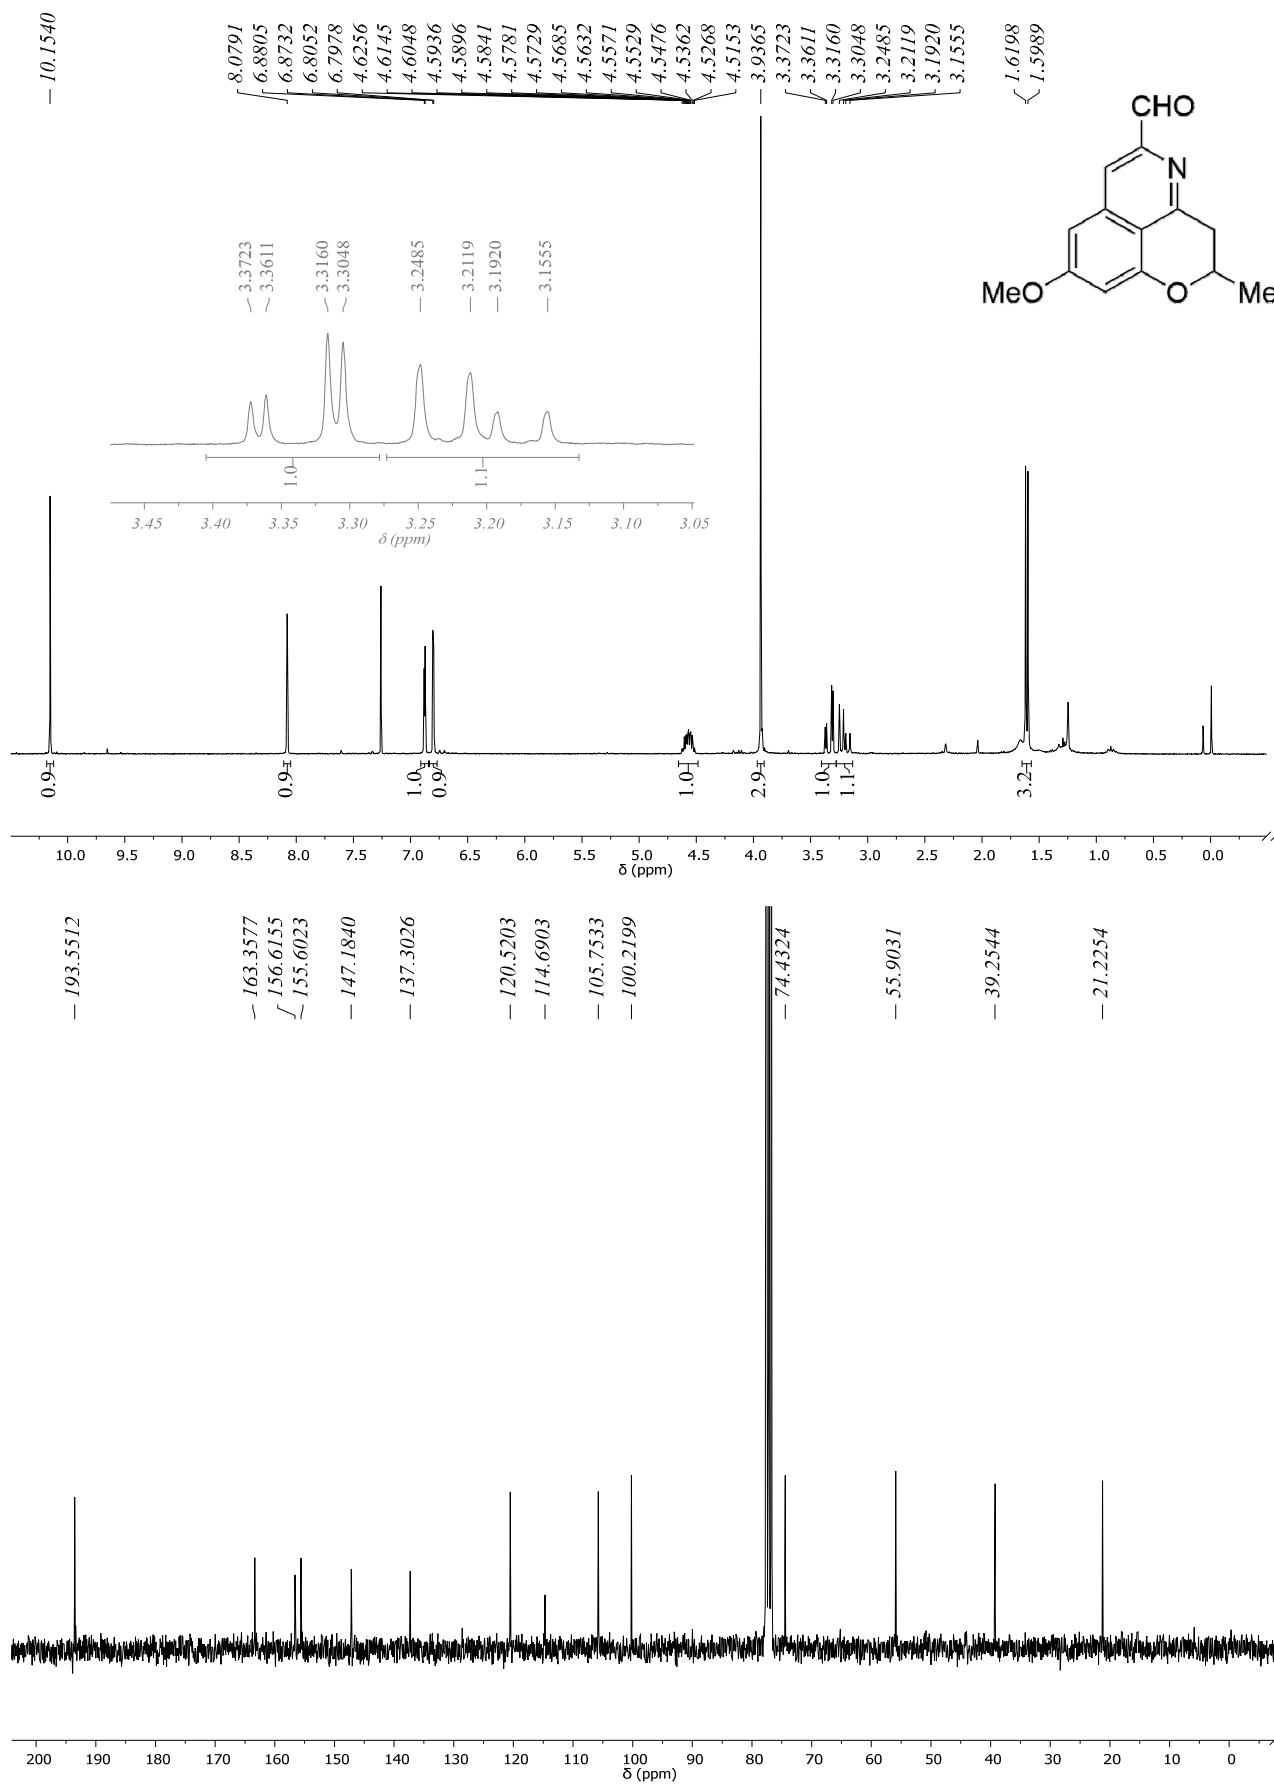

Figure S23: 300 MHz <sup>1</sup>H (top) and 75 MHz <sup>13</sup>C {<sup>1</sup>H} (bottom) NMR spectra of compound **18** in CDCl<sub>3</sub>.

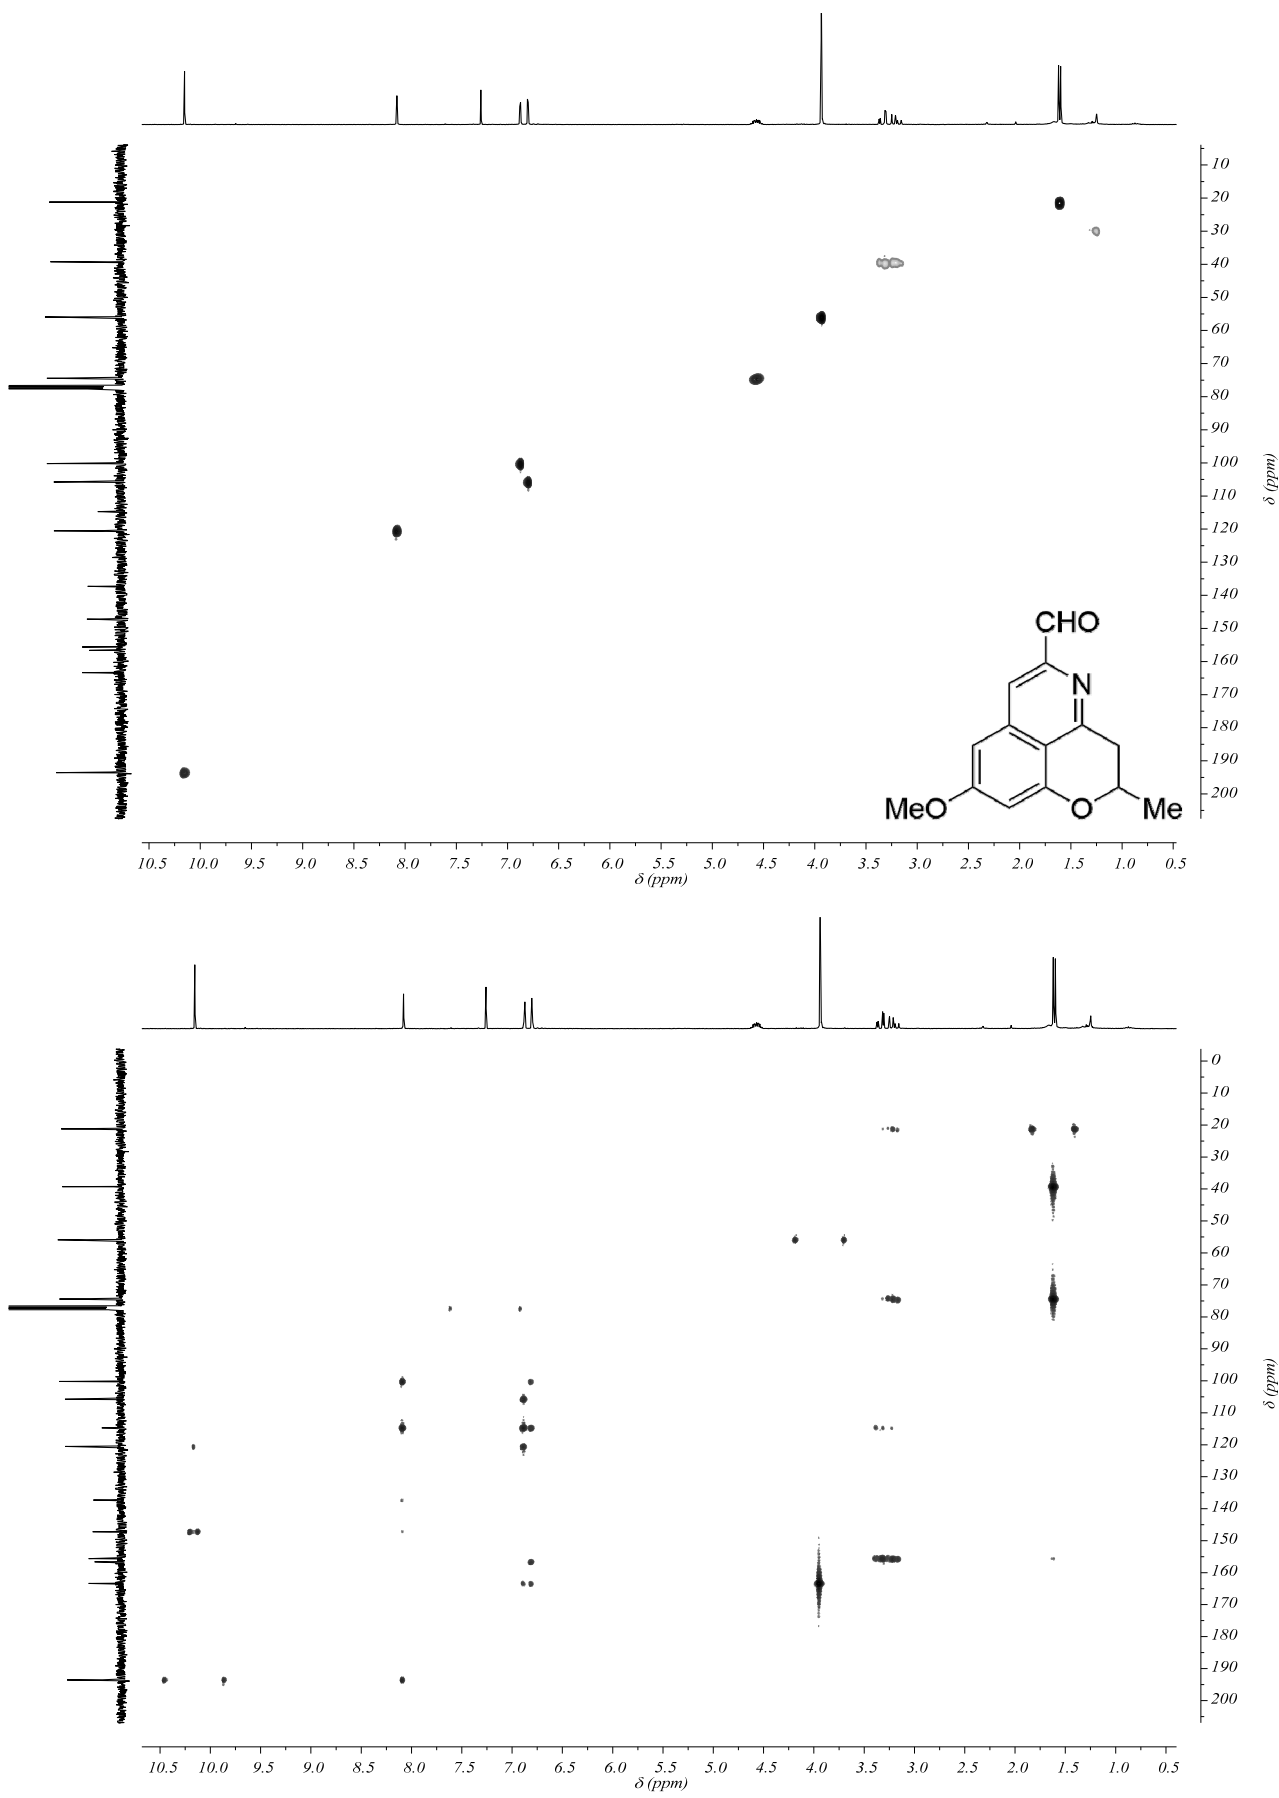

Figure S24: HSQC (top) and HMBC (bottom) spectra of compound **18** in CDCl<sub>3</sub>.

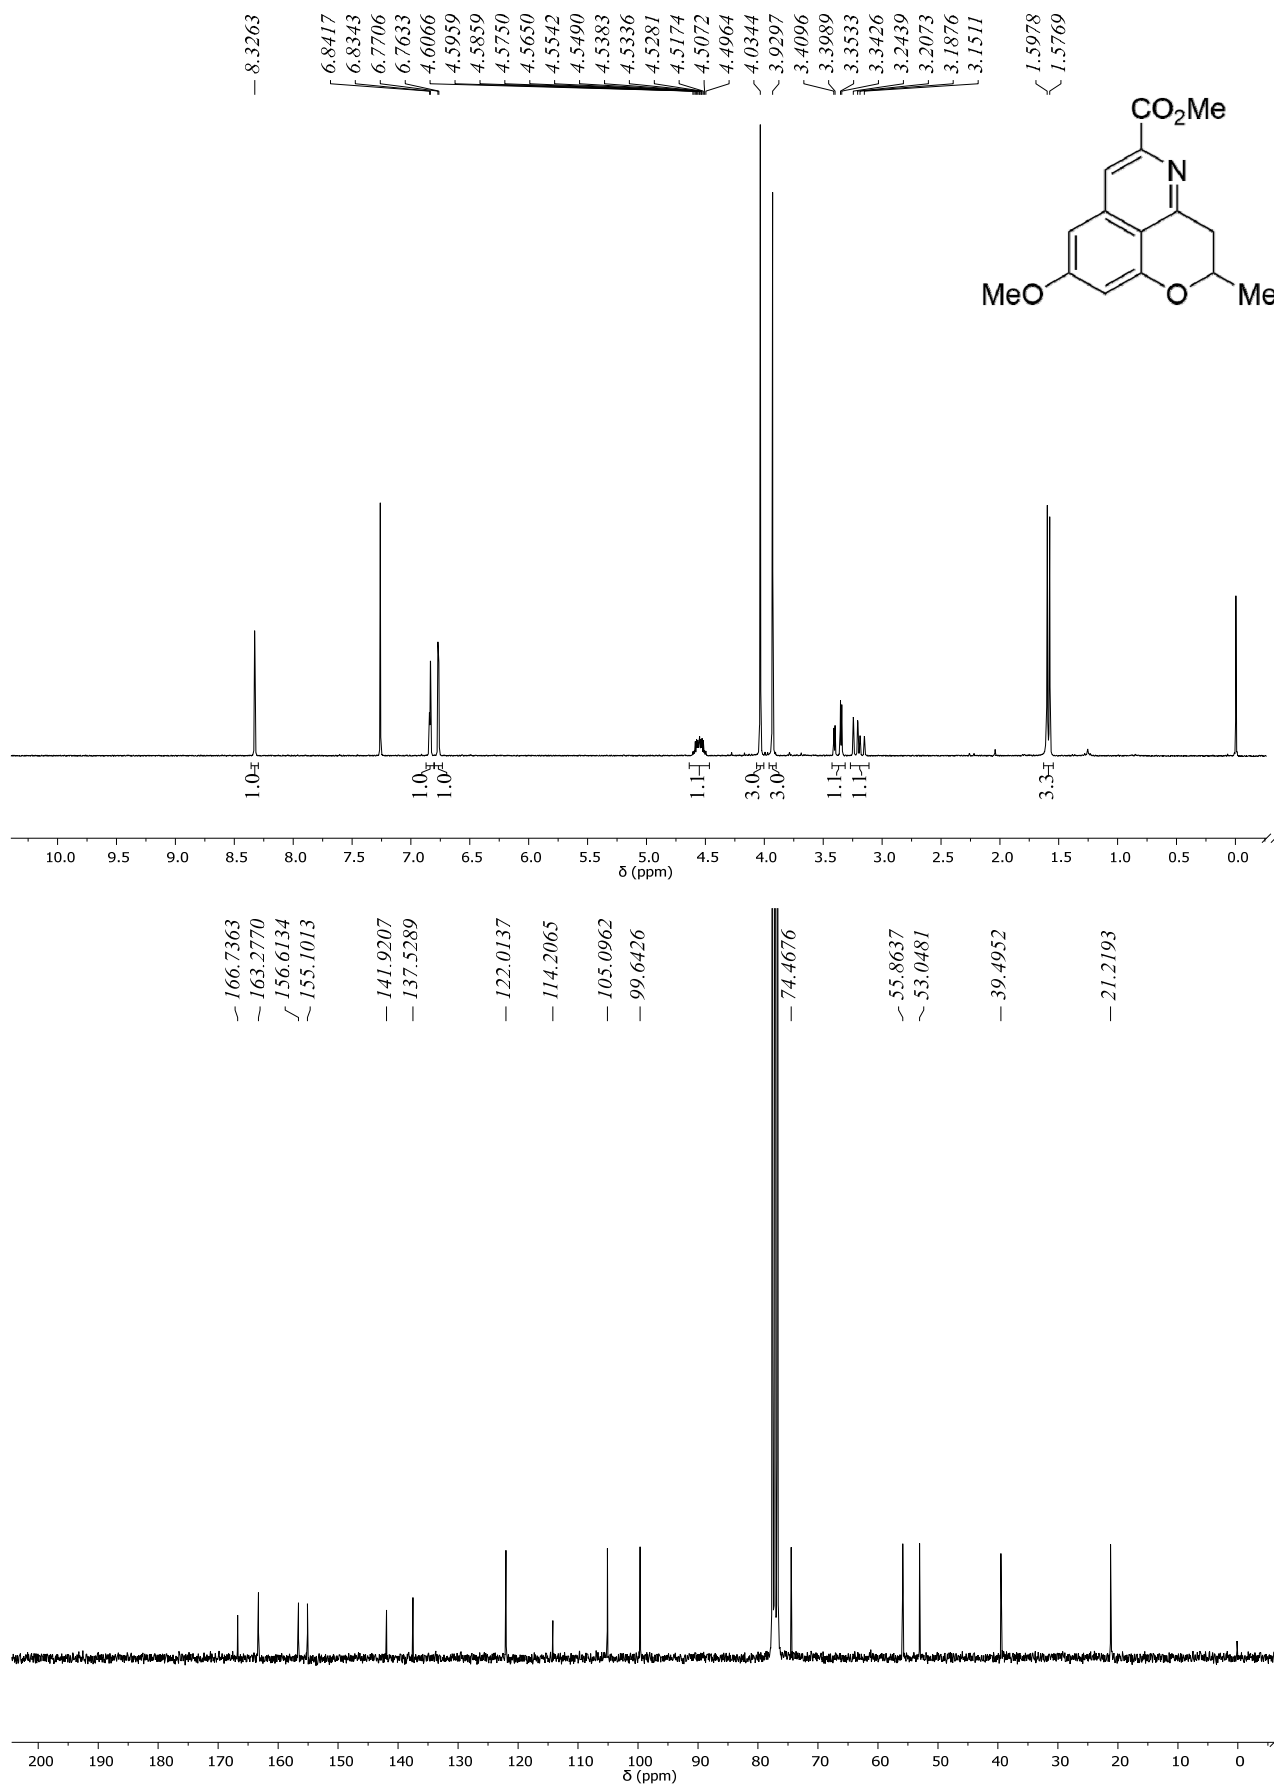

Figure S25: 300 MHz <sup>1</sup>H (top) and 75 MHz <sup>13</sup>C{<sup>1</sup>H} (bottom) NMR spectra of compound **19** in CDCl<sub>3</sub>.

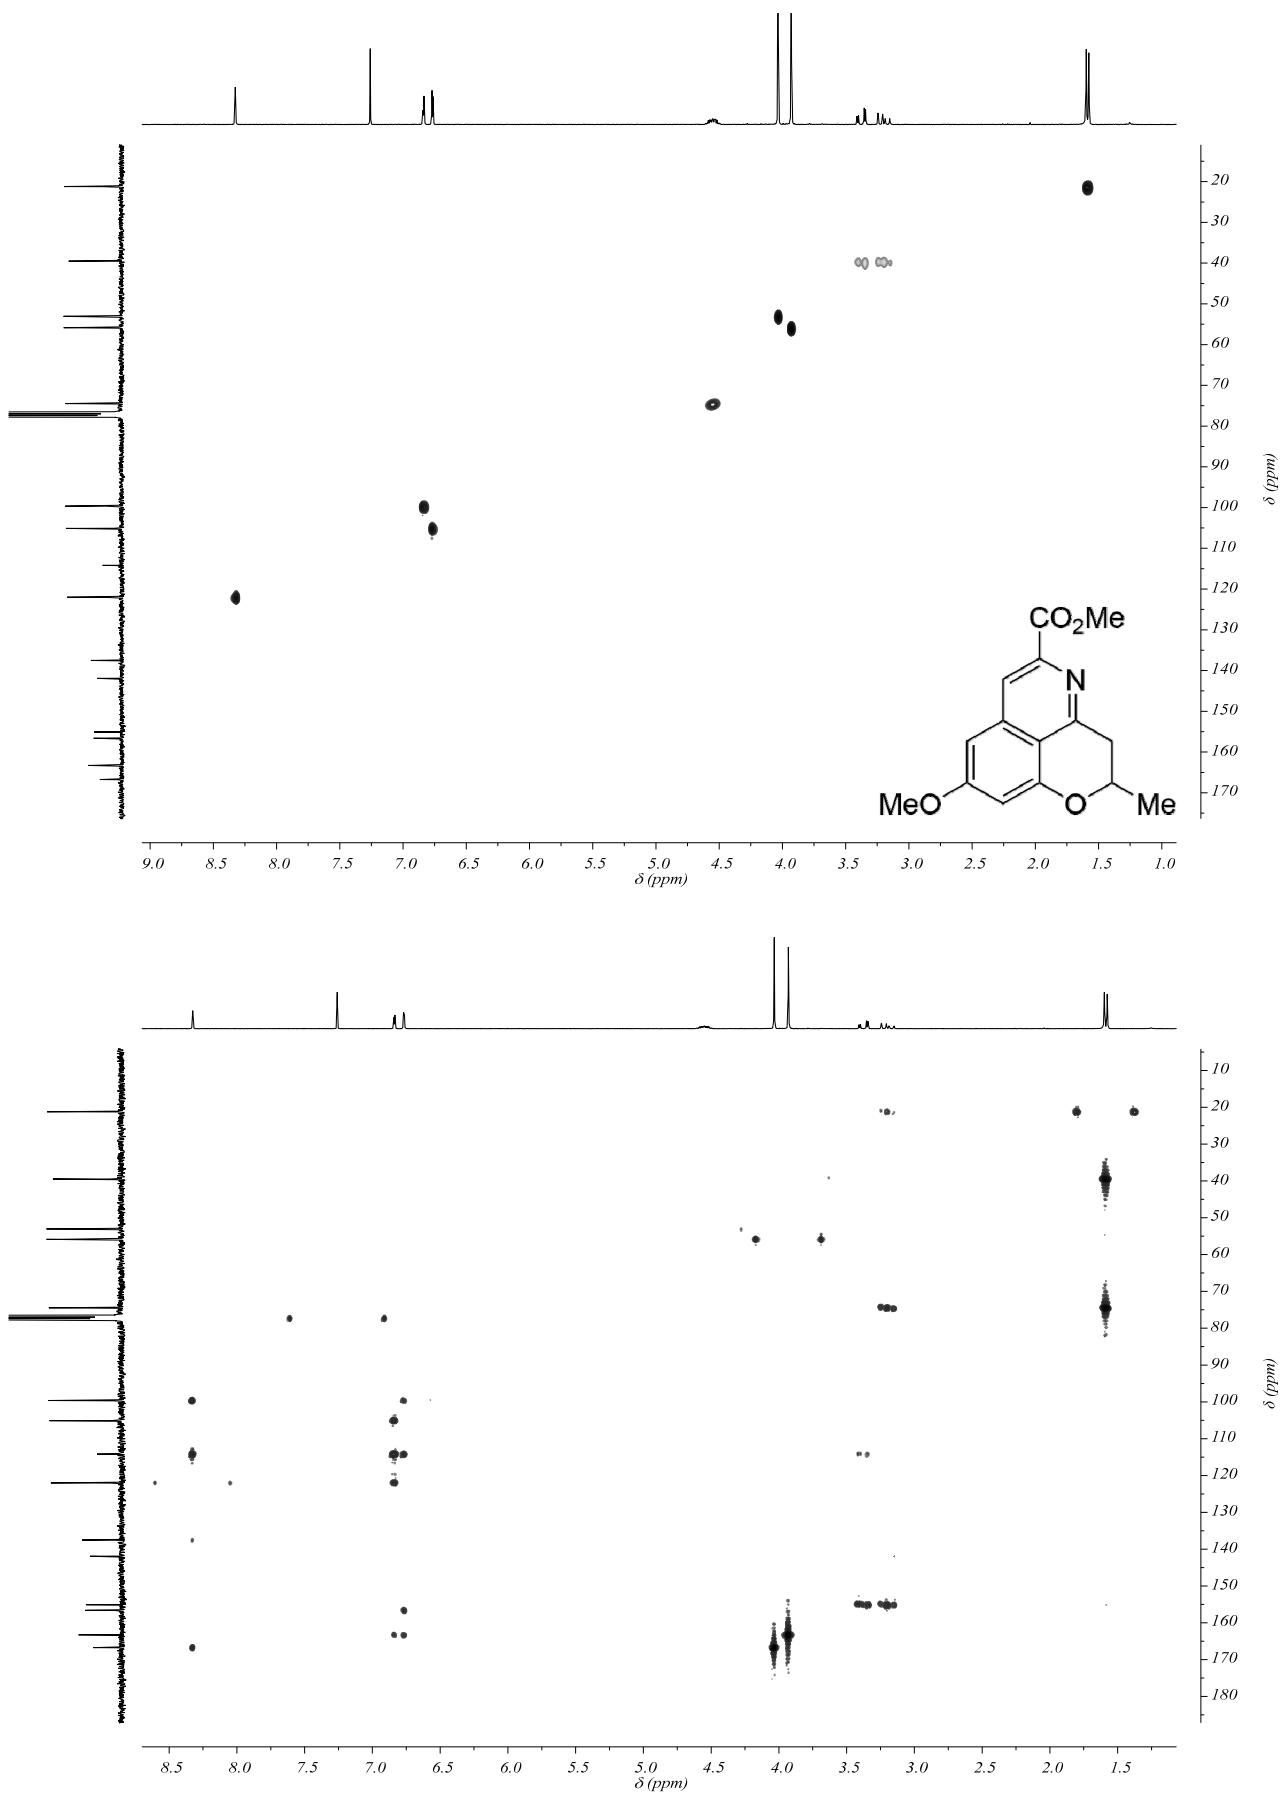

Figure S26: HSQC (top) and HMBC (bottom) spectra of compound 19 in CDCl<sub>3</sub>.

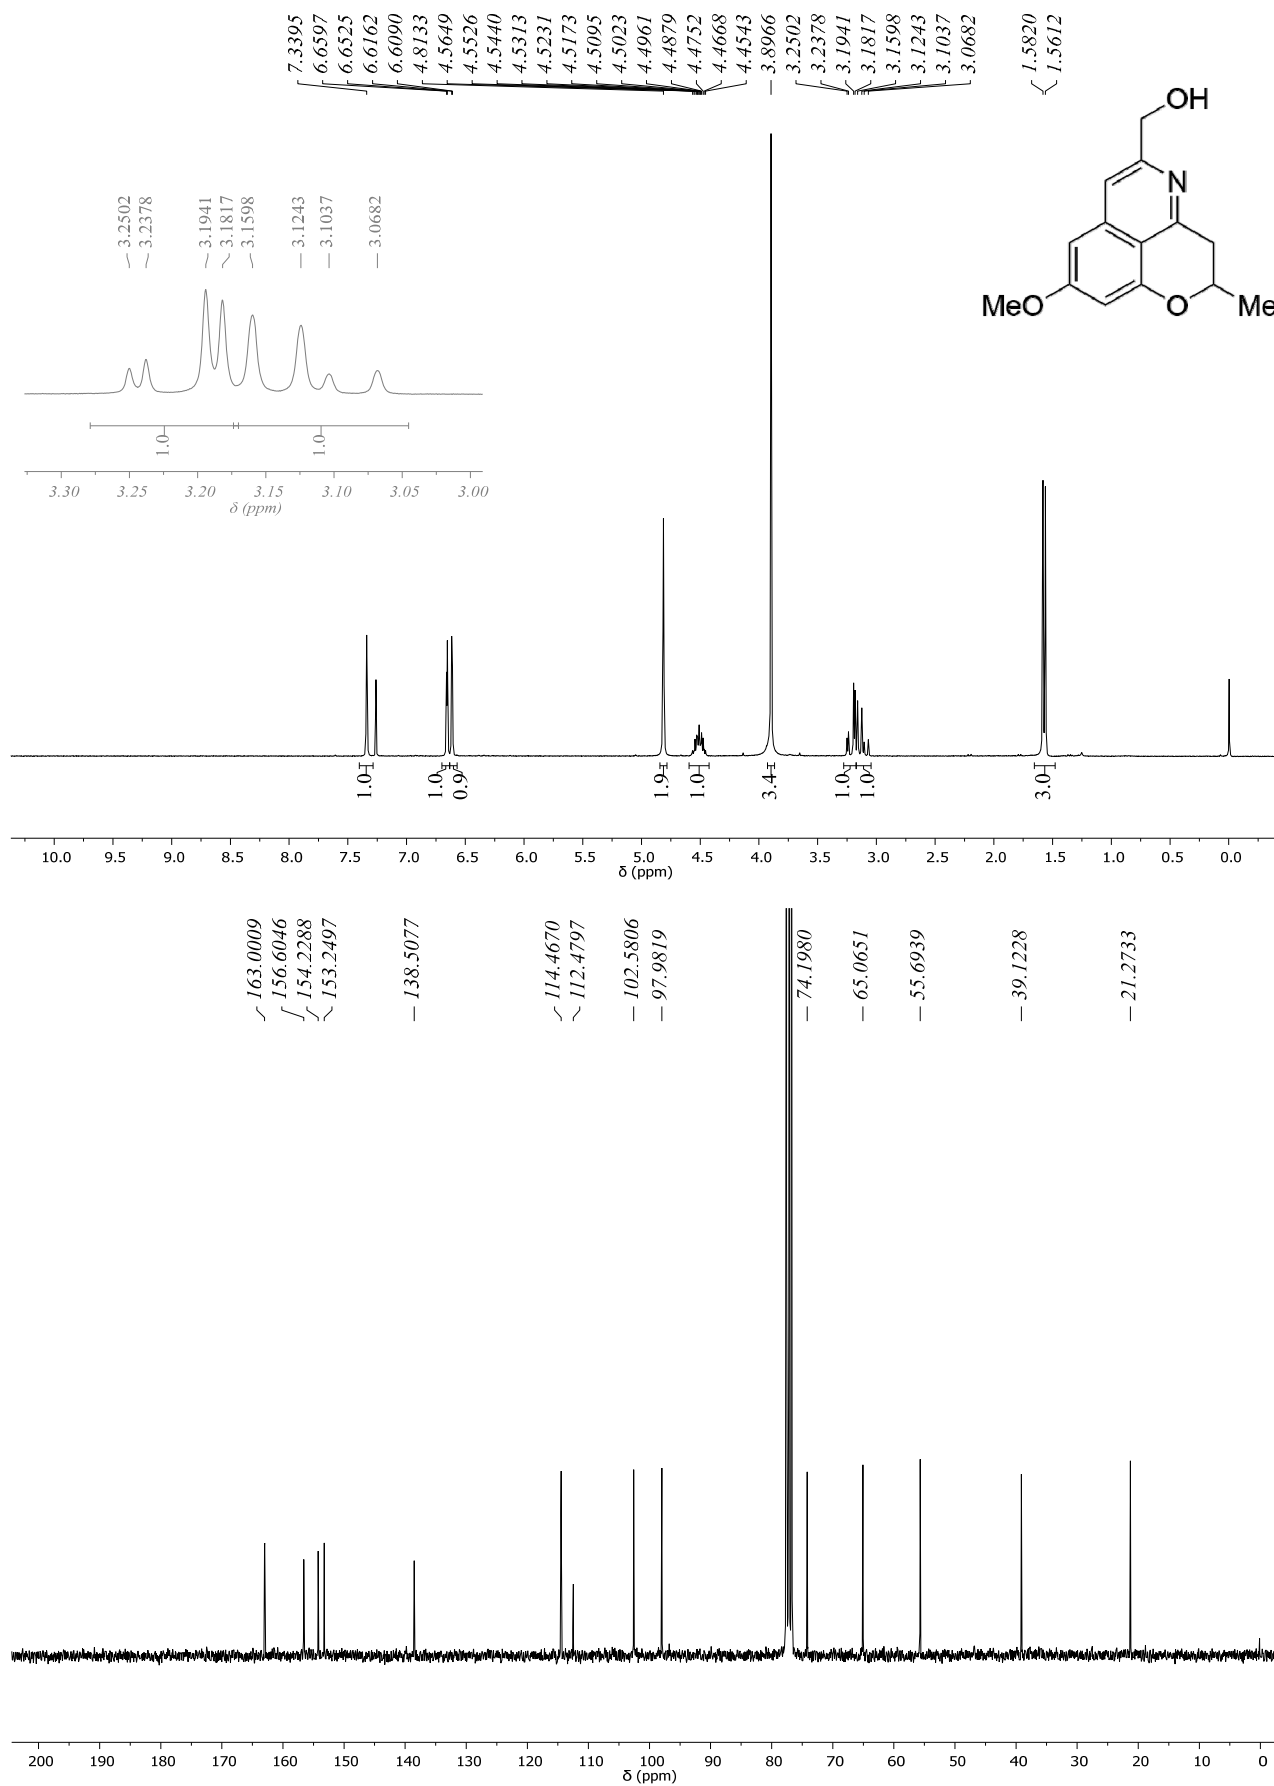

Figure S27: 300 MHz <sup>1</sup>H (top) and 75 MHz <sup>13</sup>C {<sup>1</sup>H} (bottom) NMR spectra of compound **20** in CDCl<sub>3</sub>.

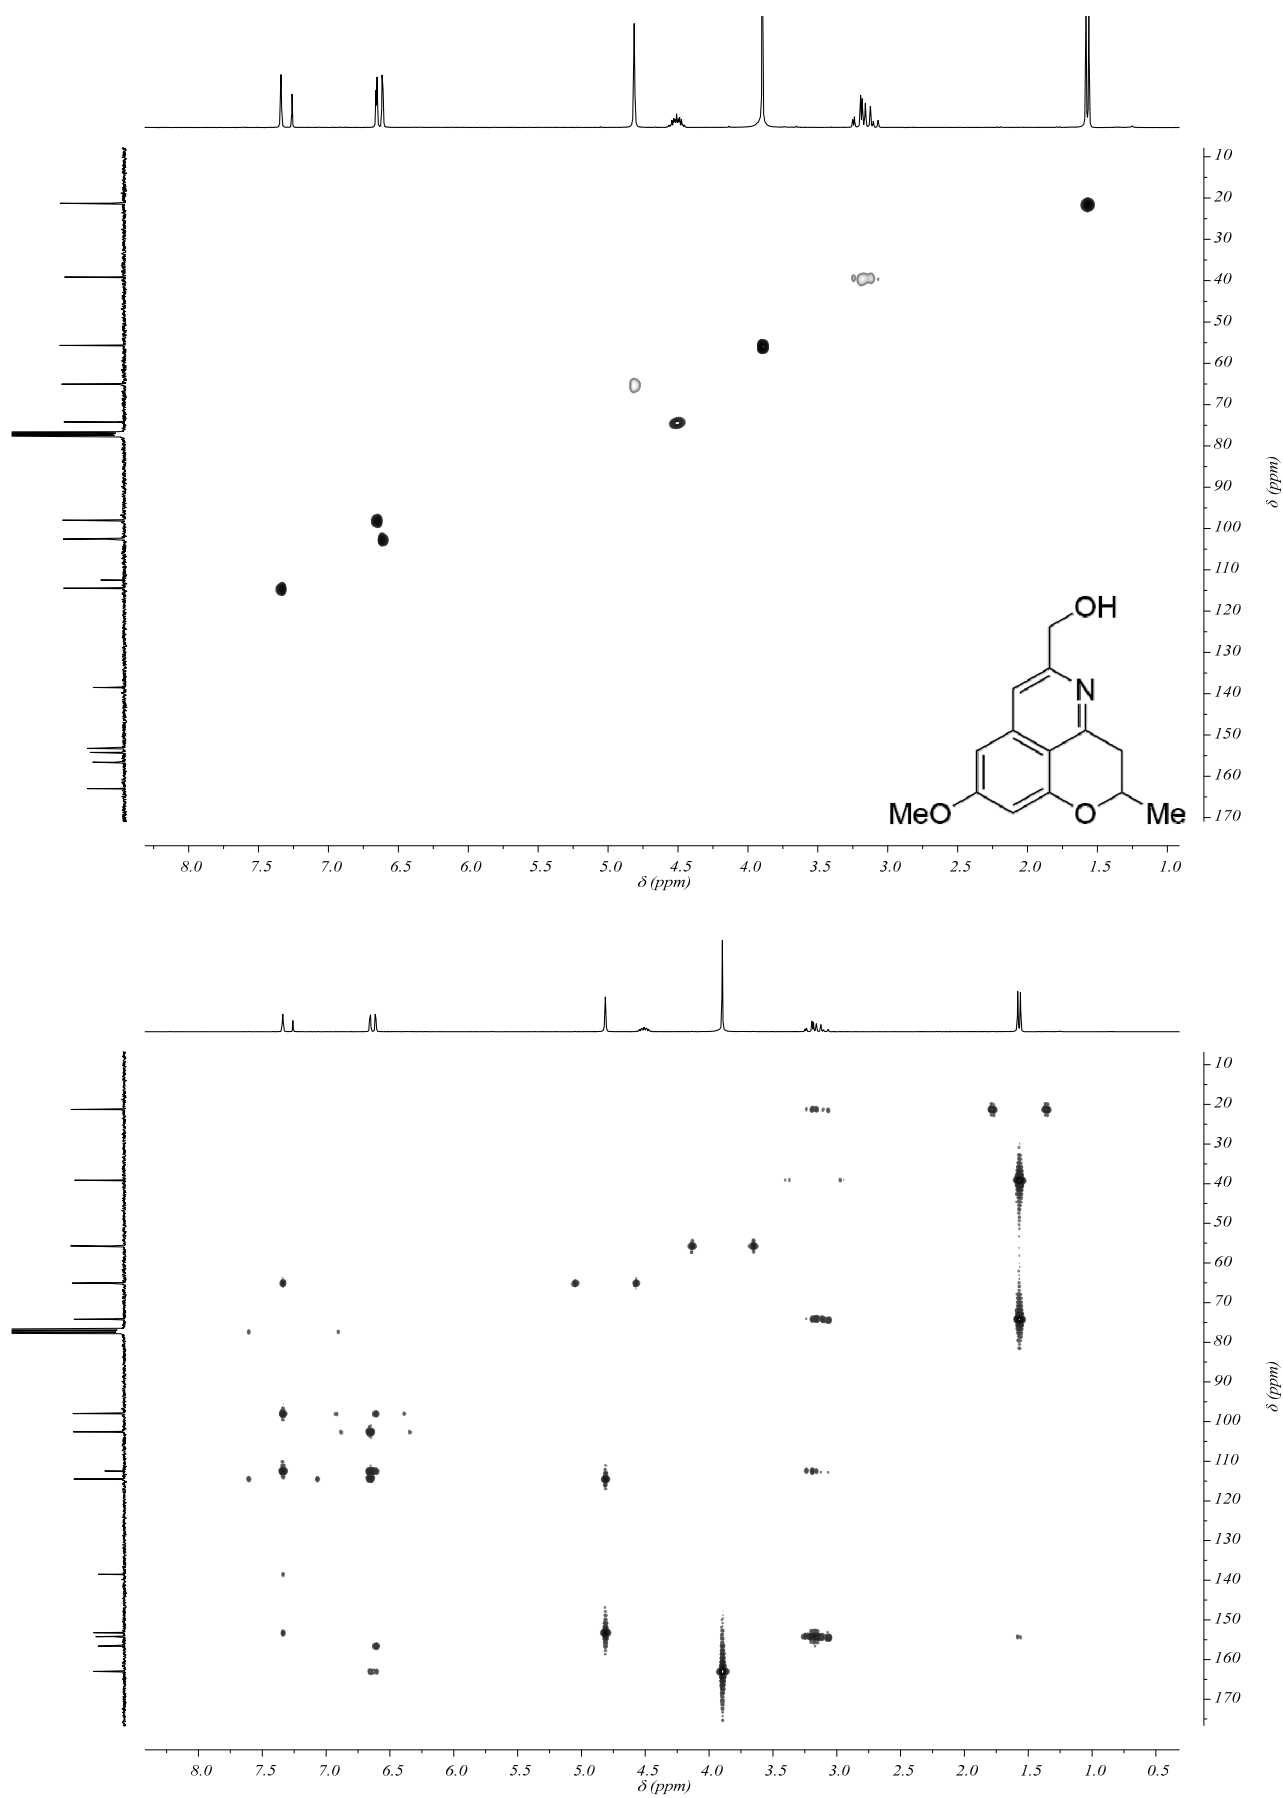

**Figure S28:** HSQC (top) and HMBC (bottom) spectra of compound **20** in CDCl<sub>3</sub>.

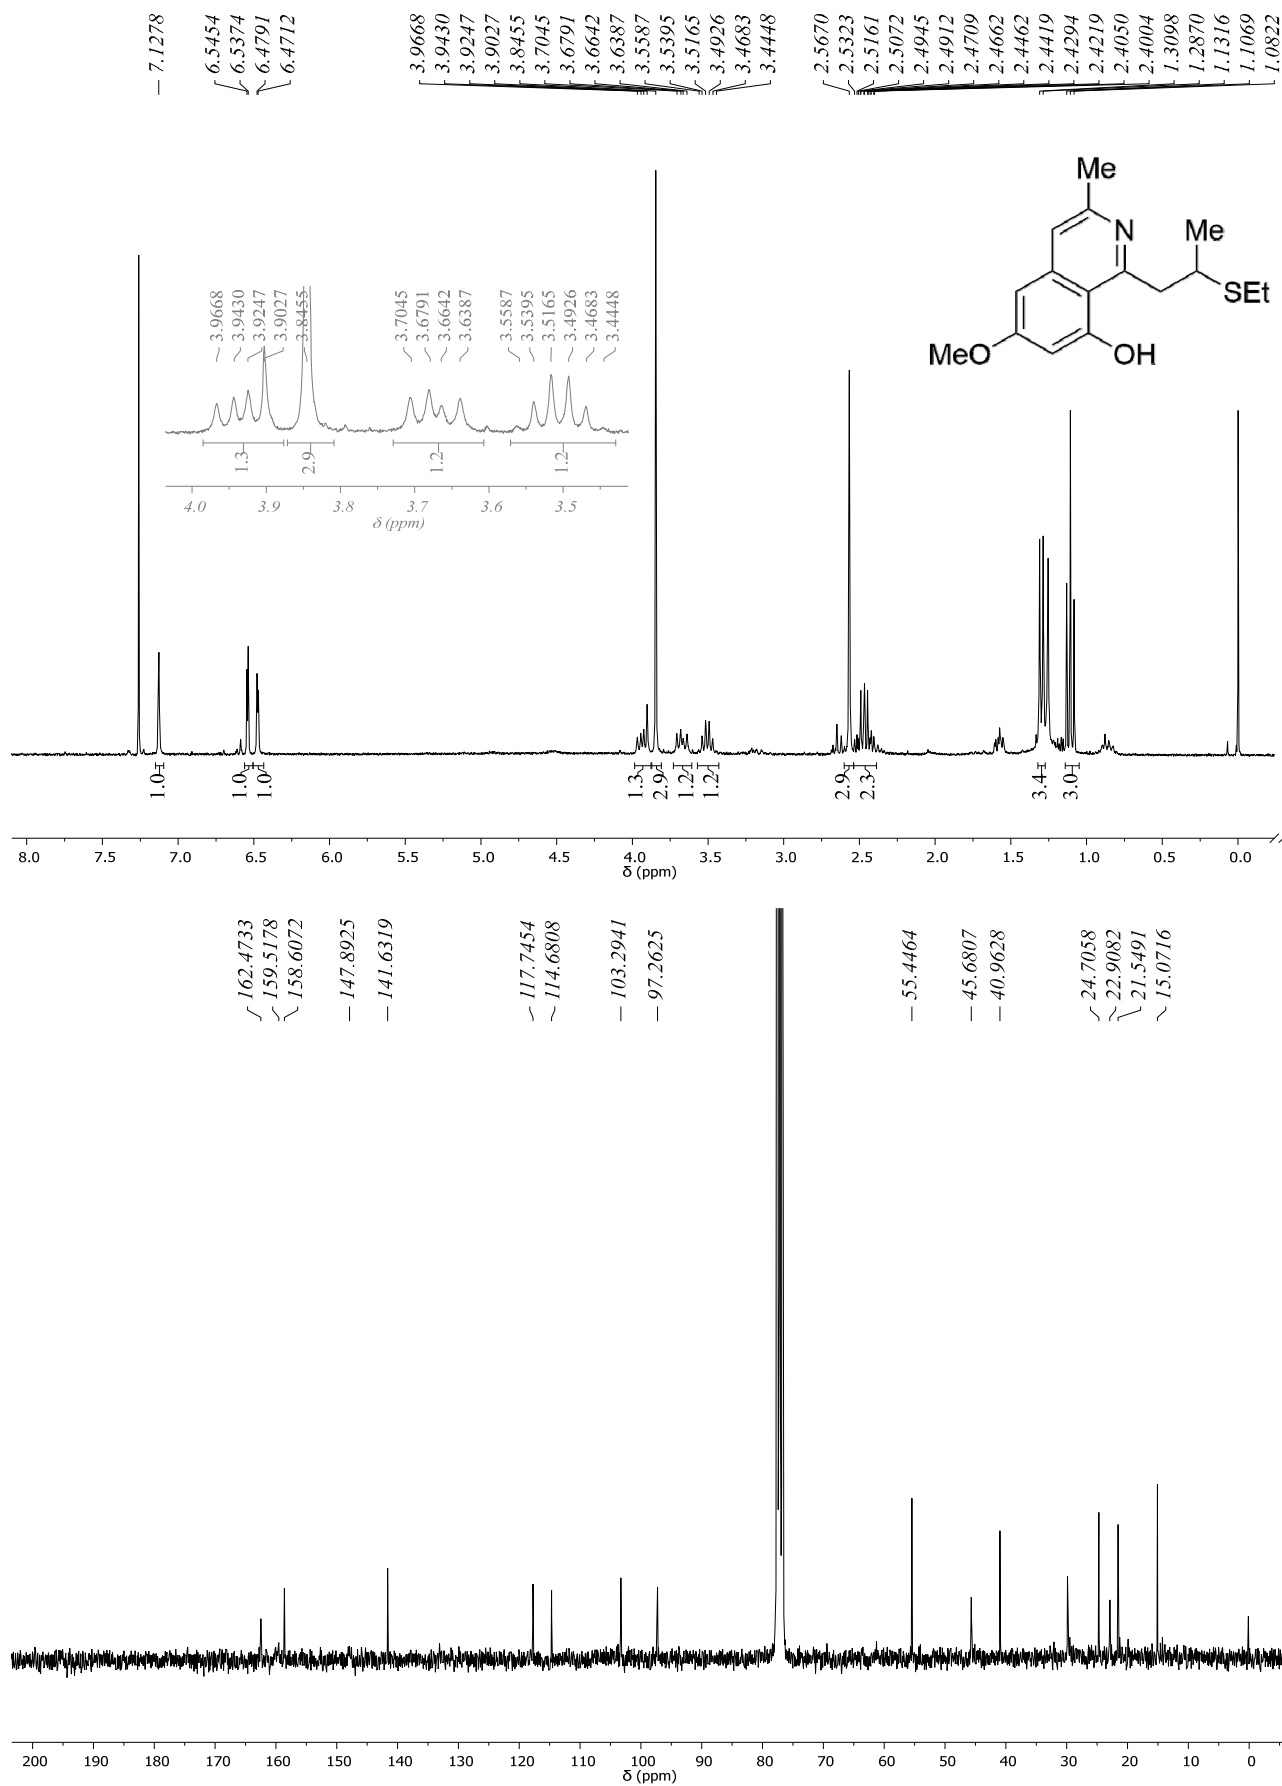

Figure S29: 300 MHz <sup>1</sup>H (top) and 75 MHz <sup>13</sup>C {<sup>1</sup>H} (bottom) NMR spectra of compound **22** in CDCl<sub>3</sub>.



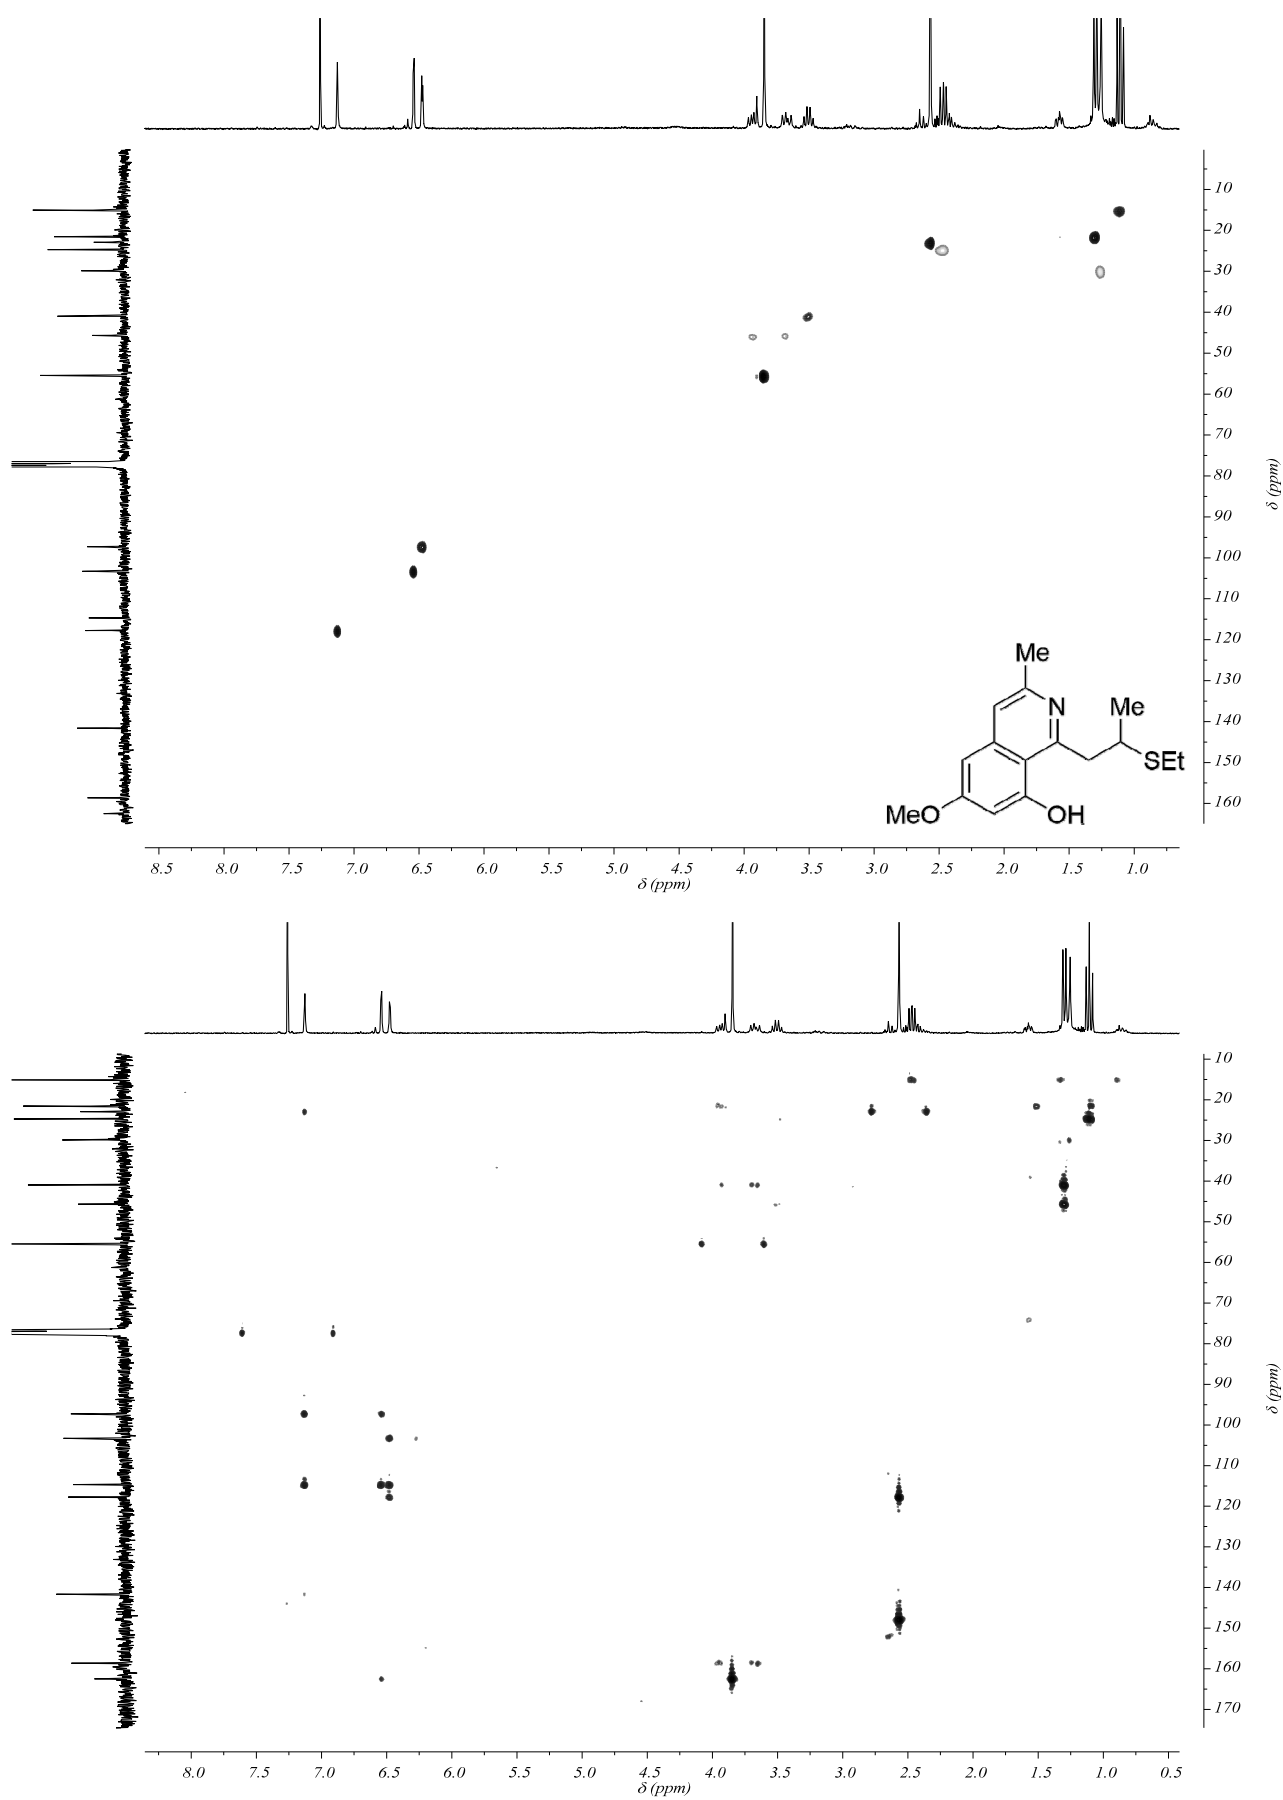

Figure S30: HSQC (top) and HMBC (bottom) spectra of compound **22** in  $\text{CDCl}_3$ .

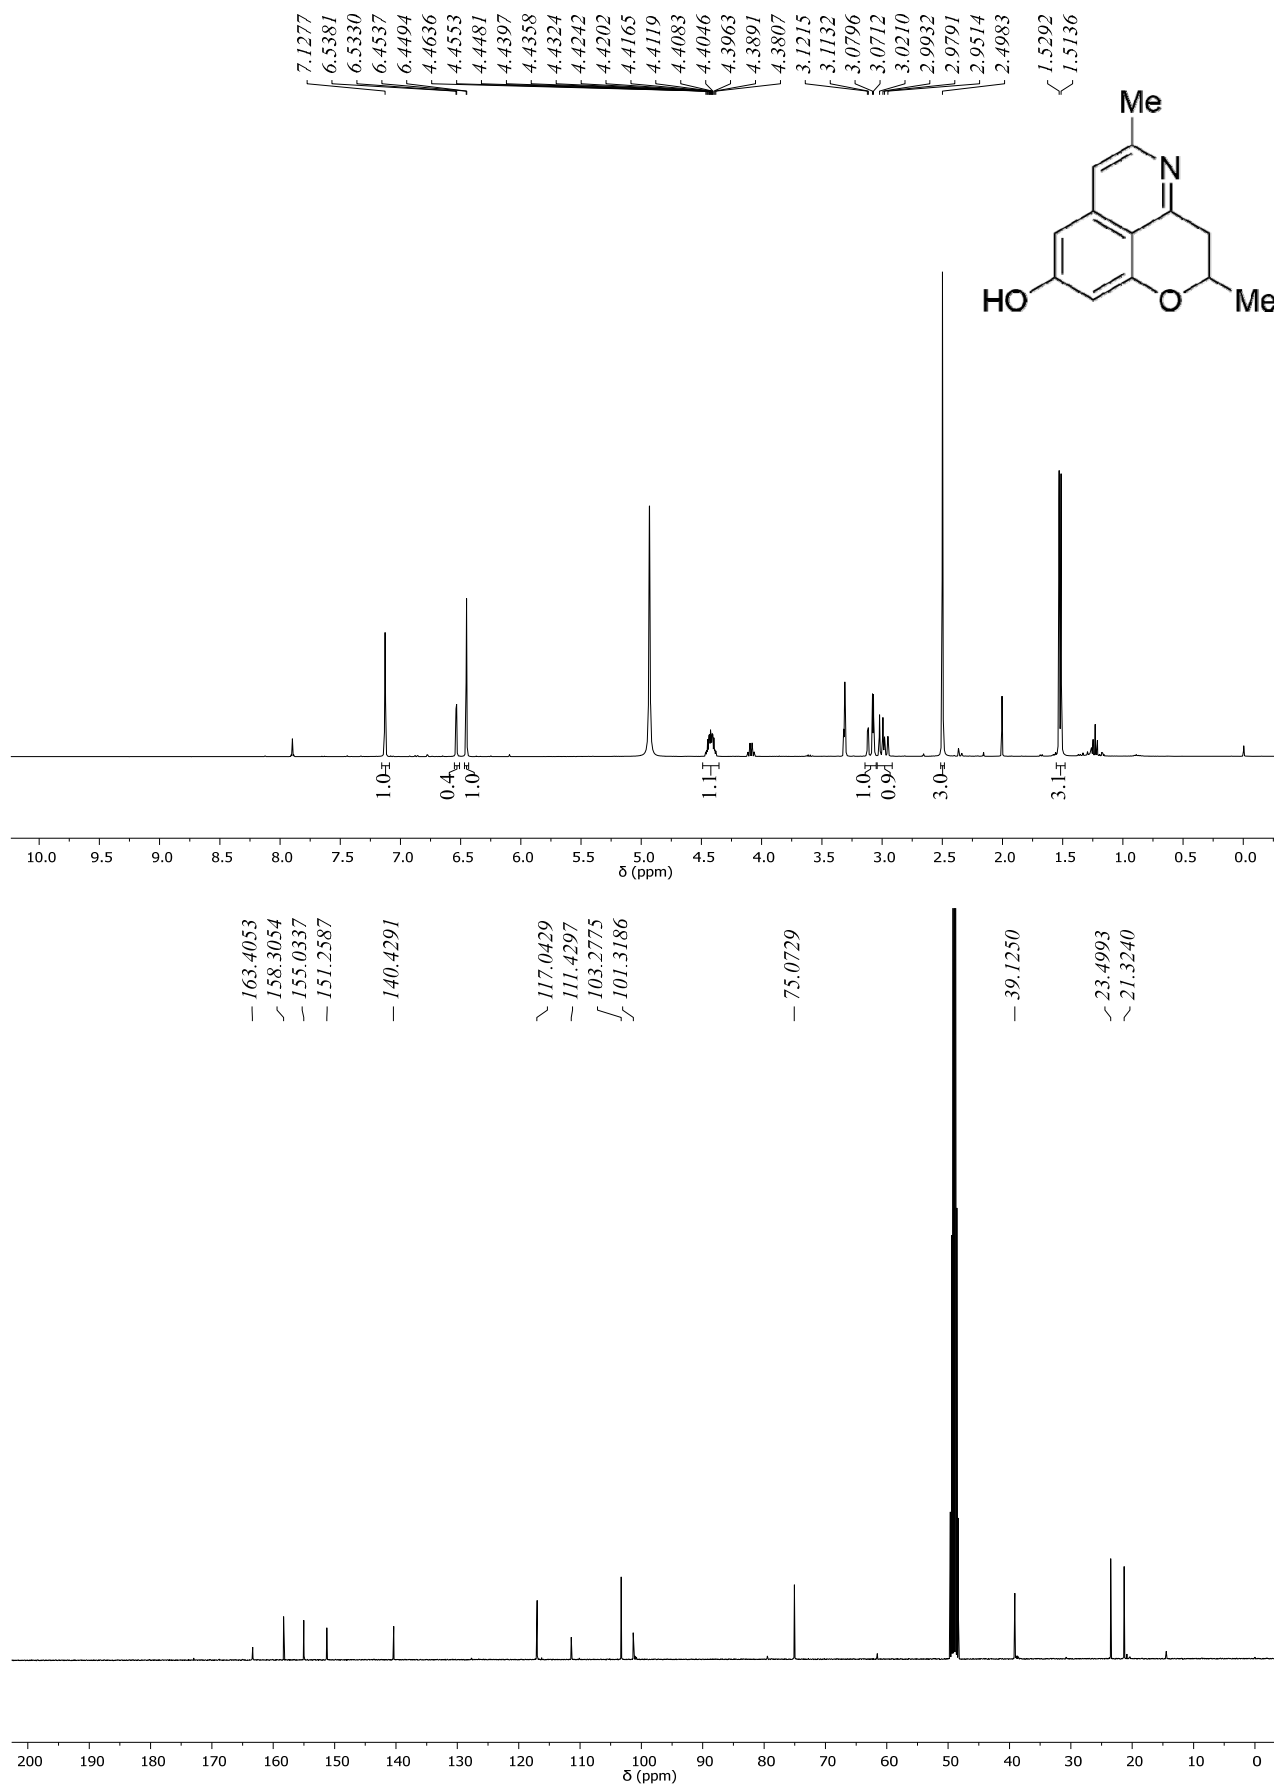

**Figure S31:** 400 MHz <sup>1</sup>H (top) and 100 MHz <sup>13</sup>C {<sup>1</sup>H} (bottom) NMR spectra of compound **1d** in CD<sub>3</sub>OD.

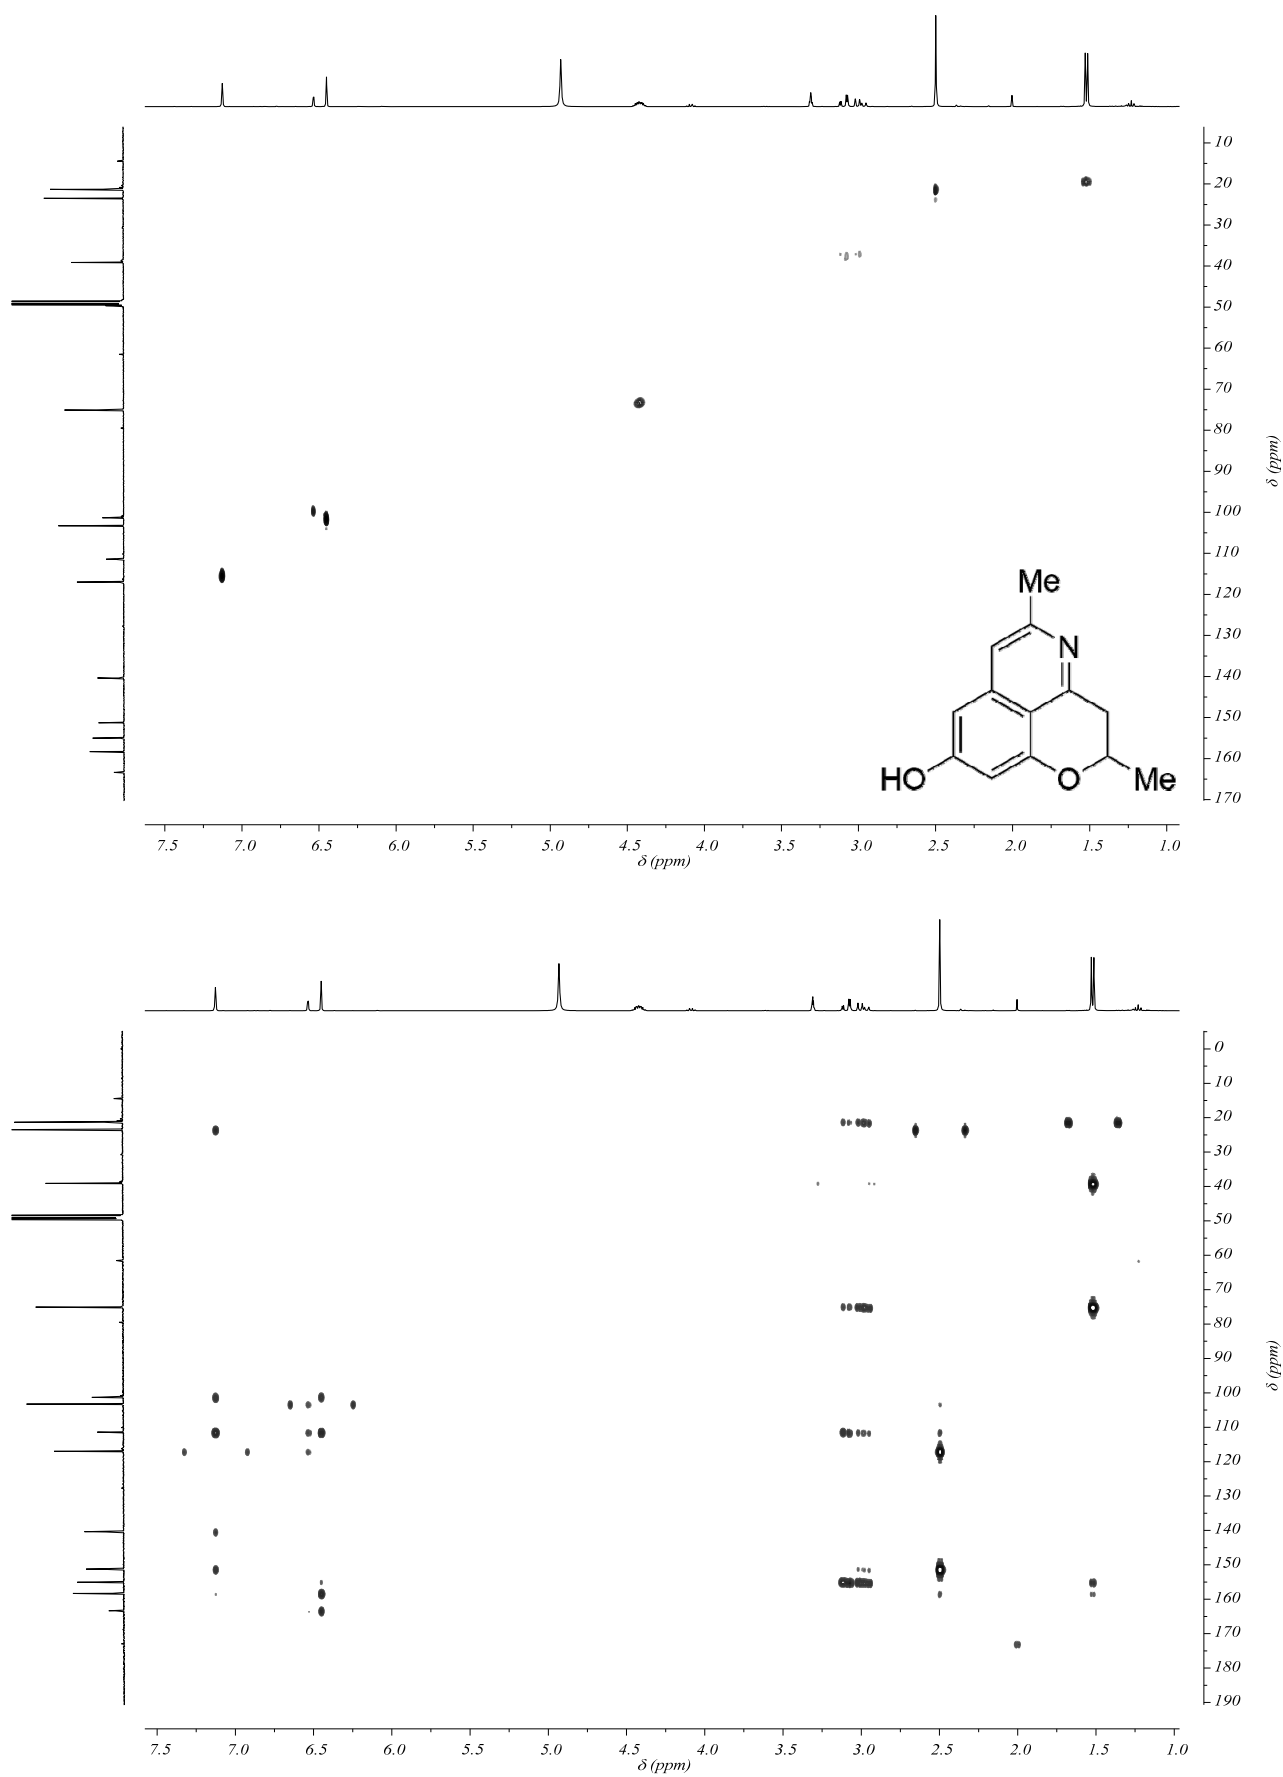

**Figure S32:** HSQC (top) and HMBC (bottom) spectra of compound **1d** in CD<sub>3</sub>OD.

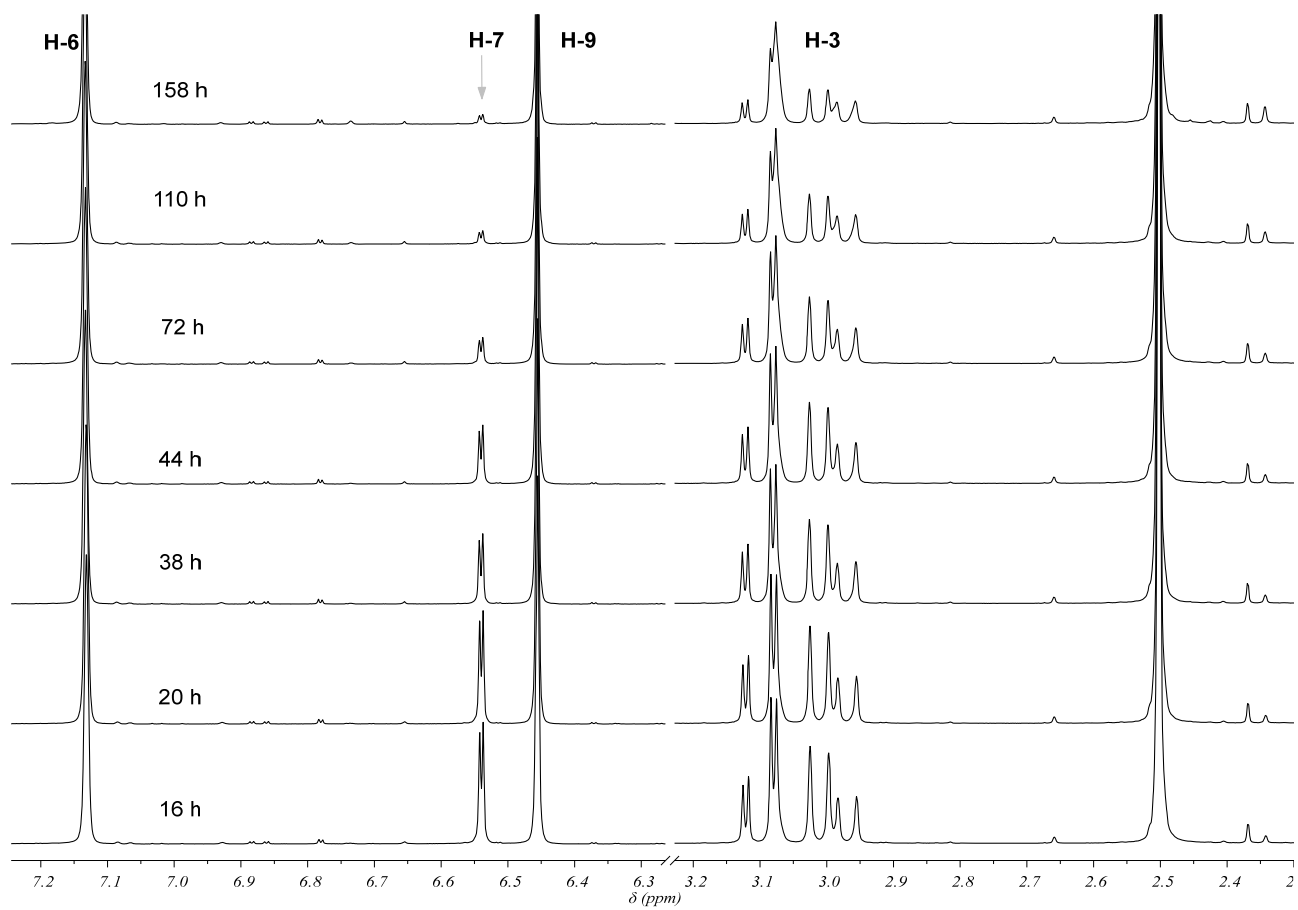

**Figure S33:** 400 MHz  $^1\text{H}$  NMR spectra of H/D-exchange of compound **1d** in  $\text{CD}_3\text{OD}$ .

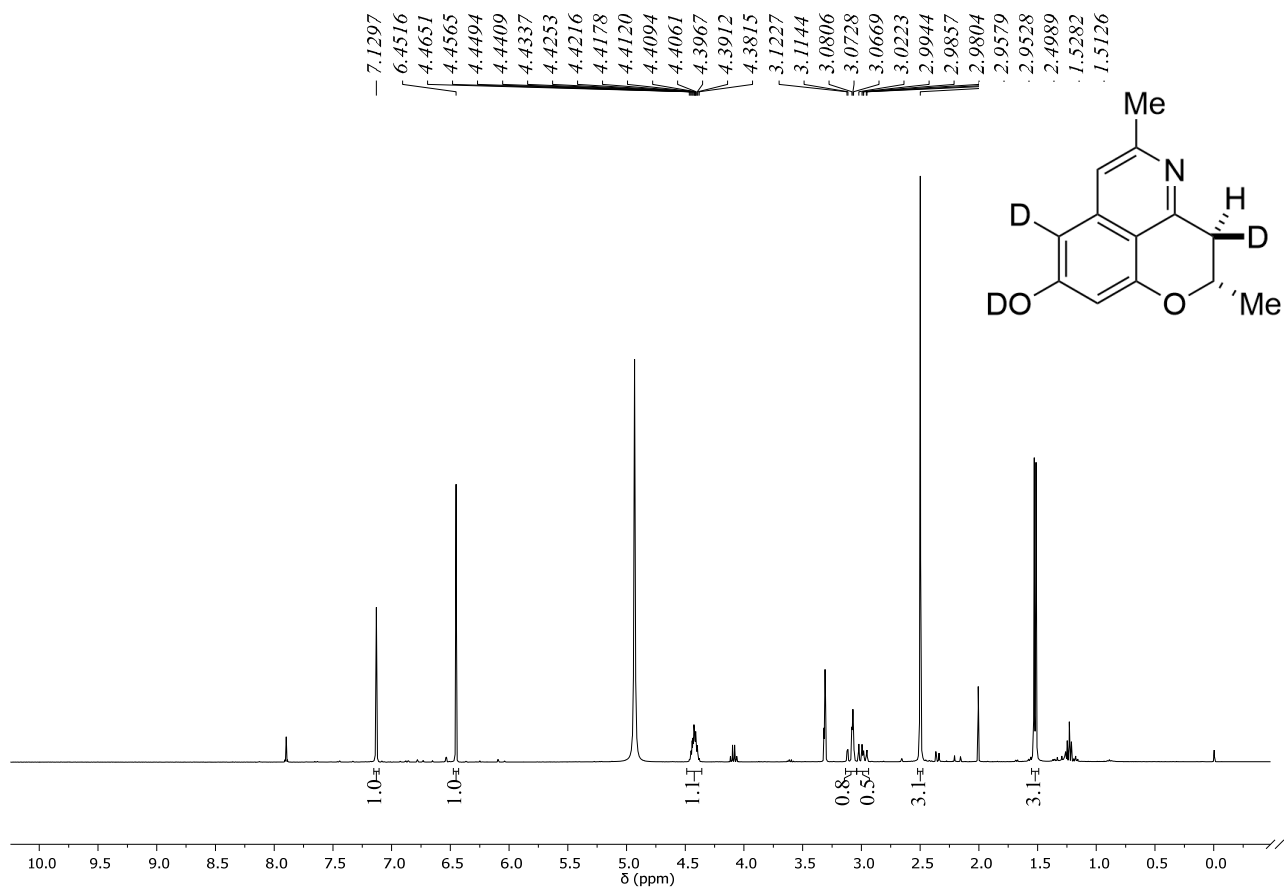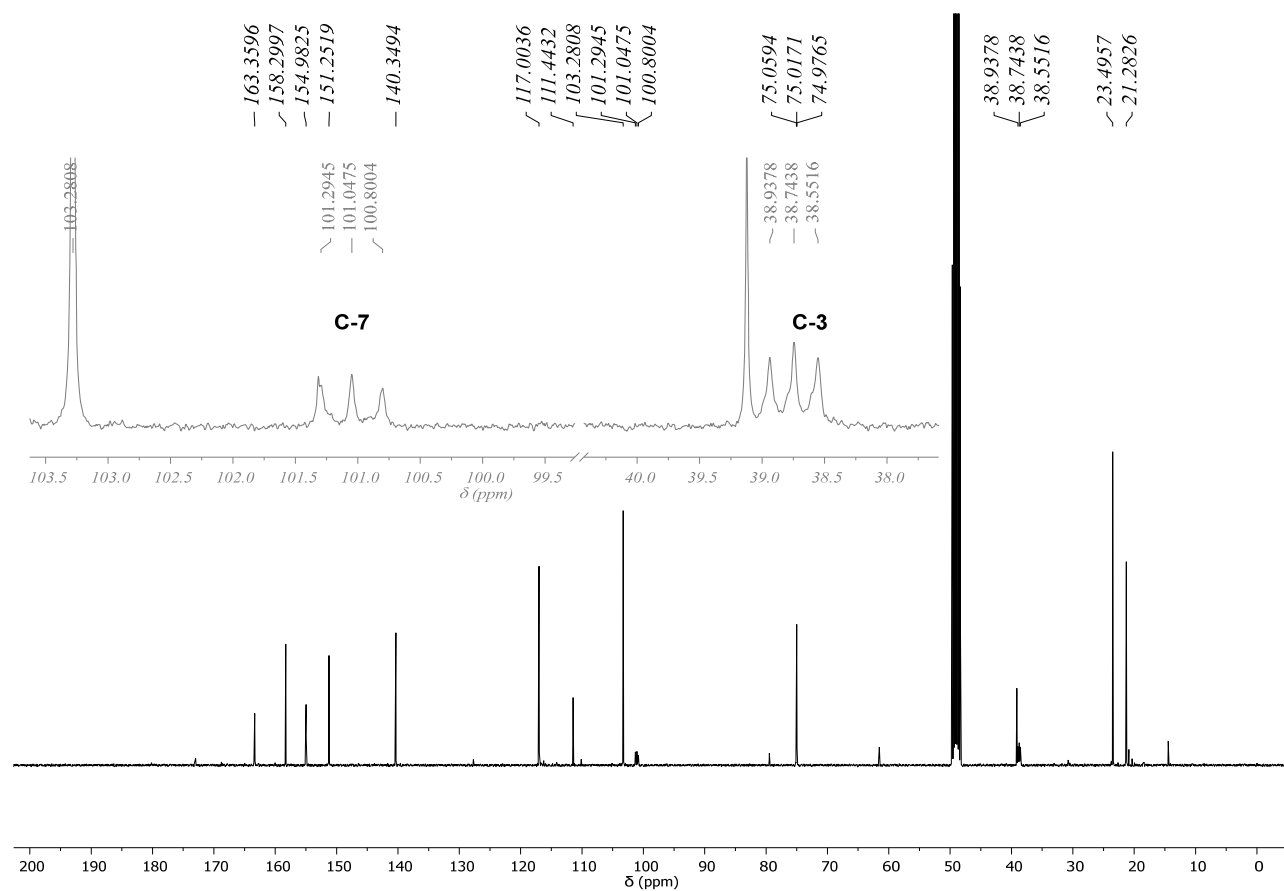

**Figure S34:** 400 MHz <sup>1</sup>H (top) and 100 MHz <sup>13</sup>C{<sup>1</sup>H} (bottom) NMR spectra of compound **[3β,7-d<sub>2</sub>]-1d** in CD<sub>3</sub>OD.

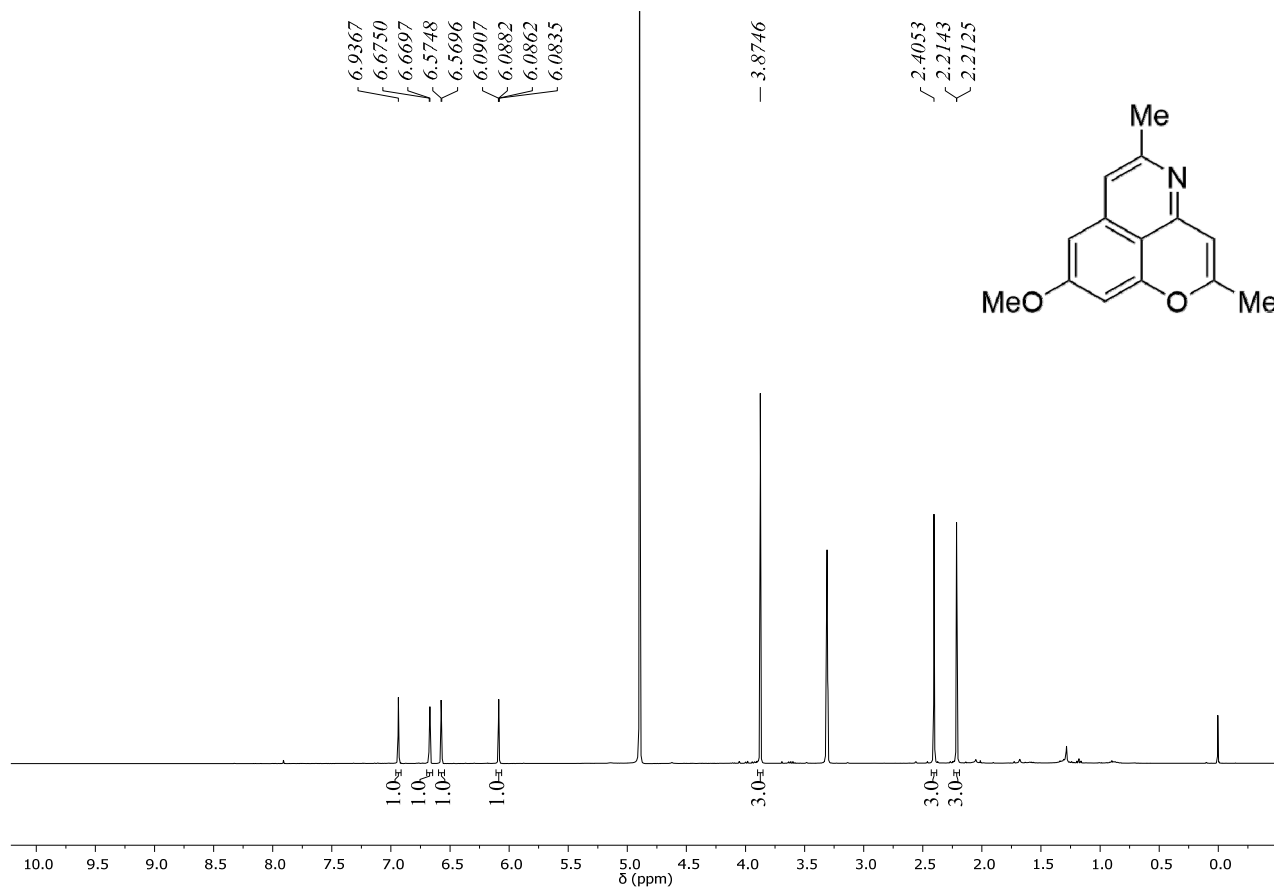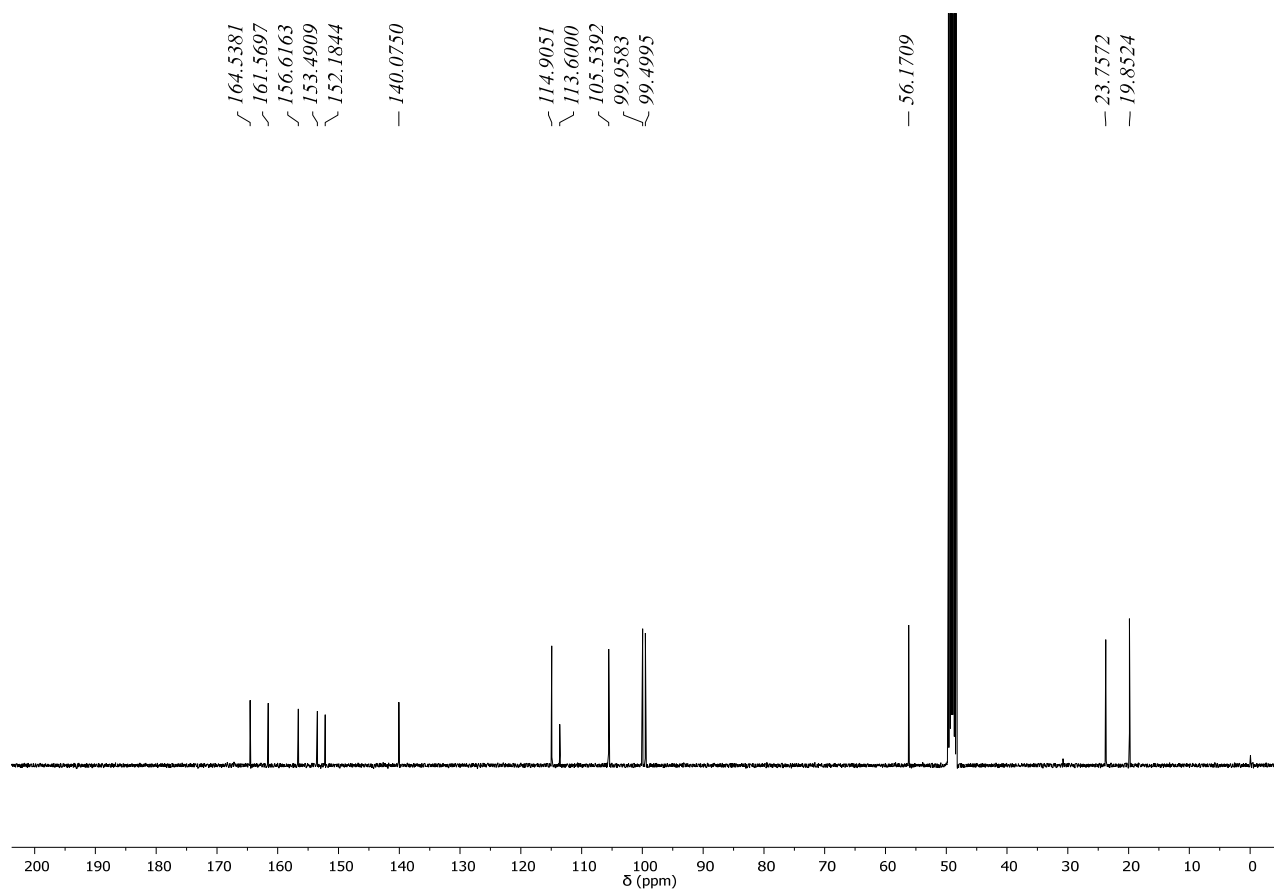

**Figure S35:** 400 MHz <sup>1</sup>H (top) and 100 MHz <sup>13</sup>C {<sup>1</sup>H} (bottom) NMR spectra of compound **1m** in CD<sub>3</sub>OD.

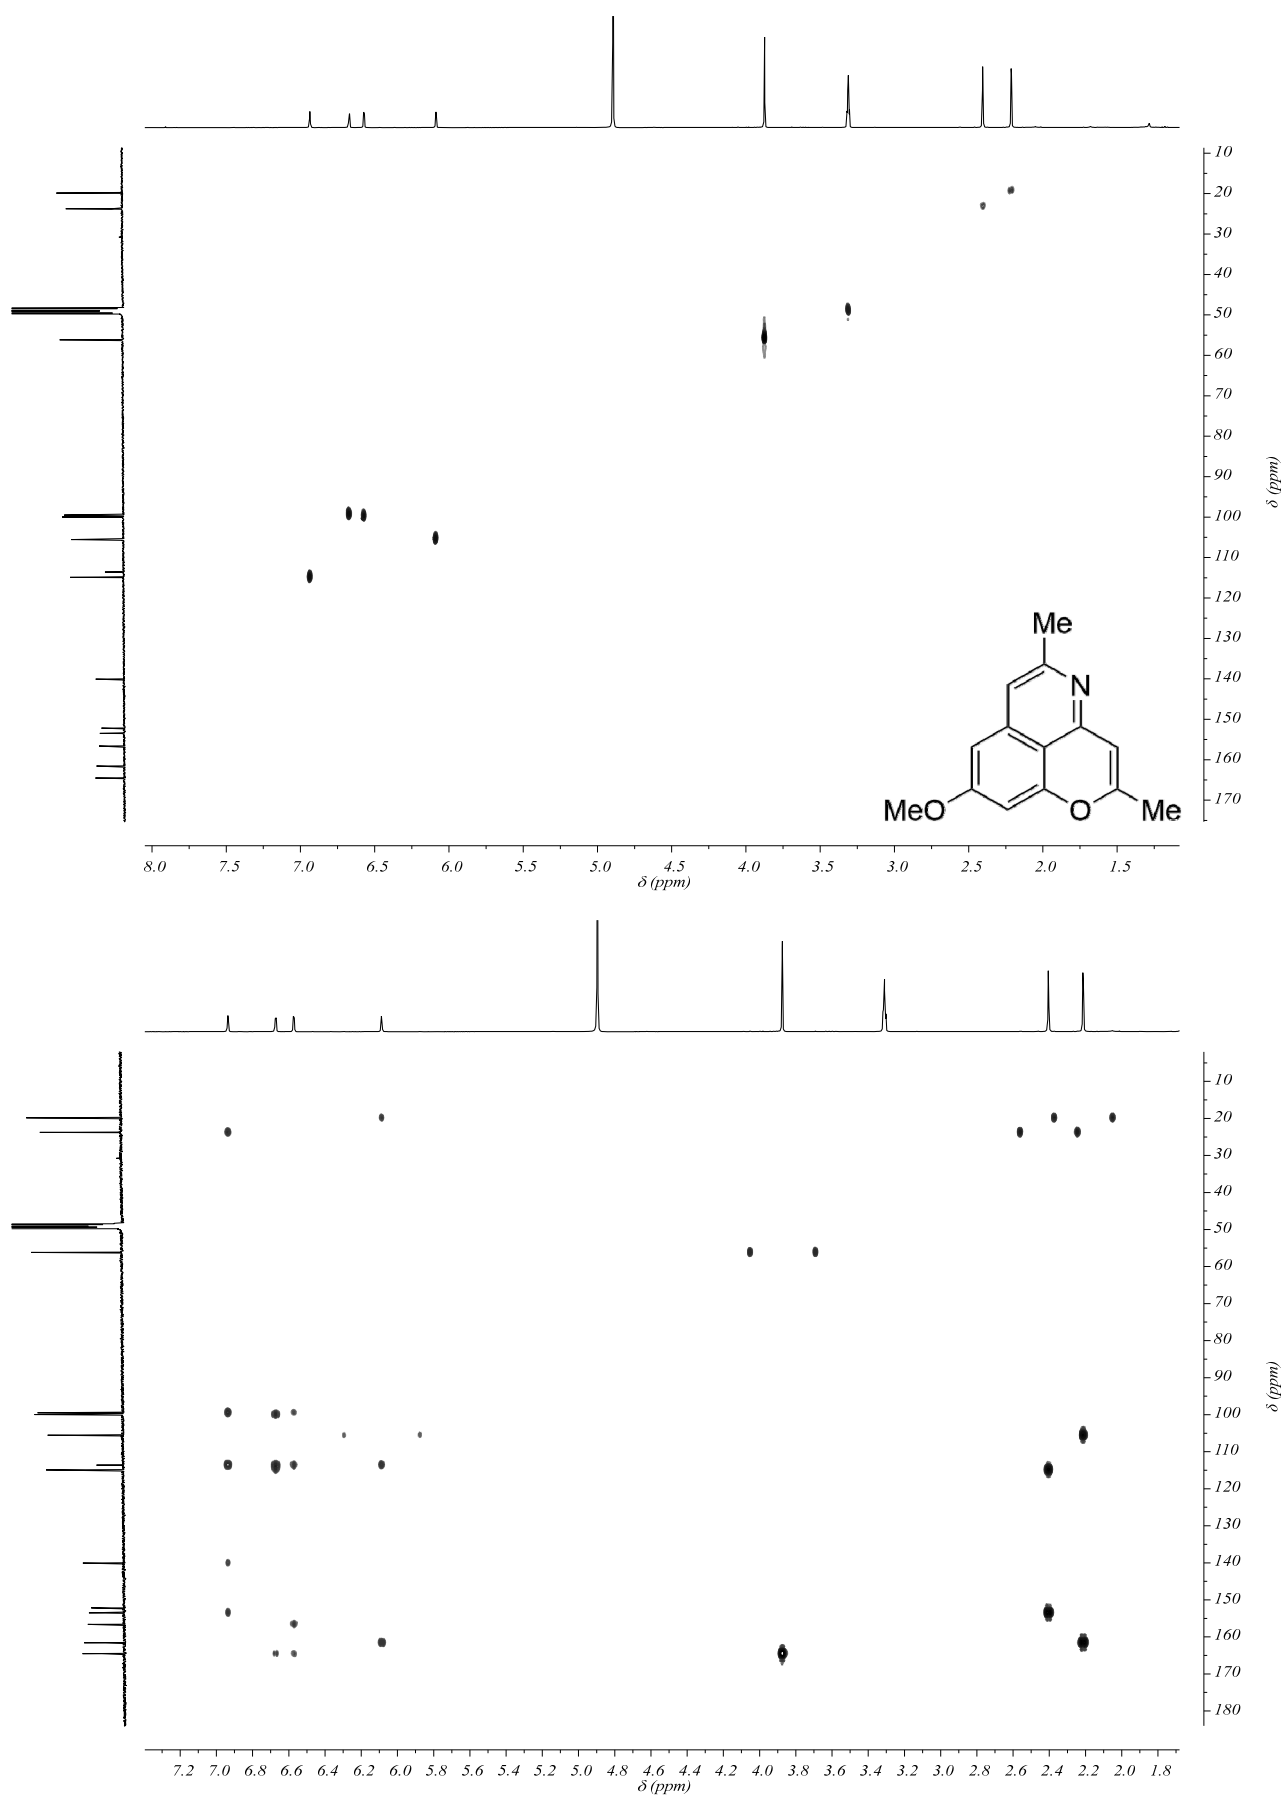

**Figure S36:** HSQC (top) and HMBC (bottom) spectra of compound **1m** in CD<sub>3</sub>OD.

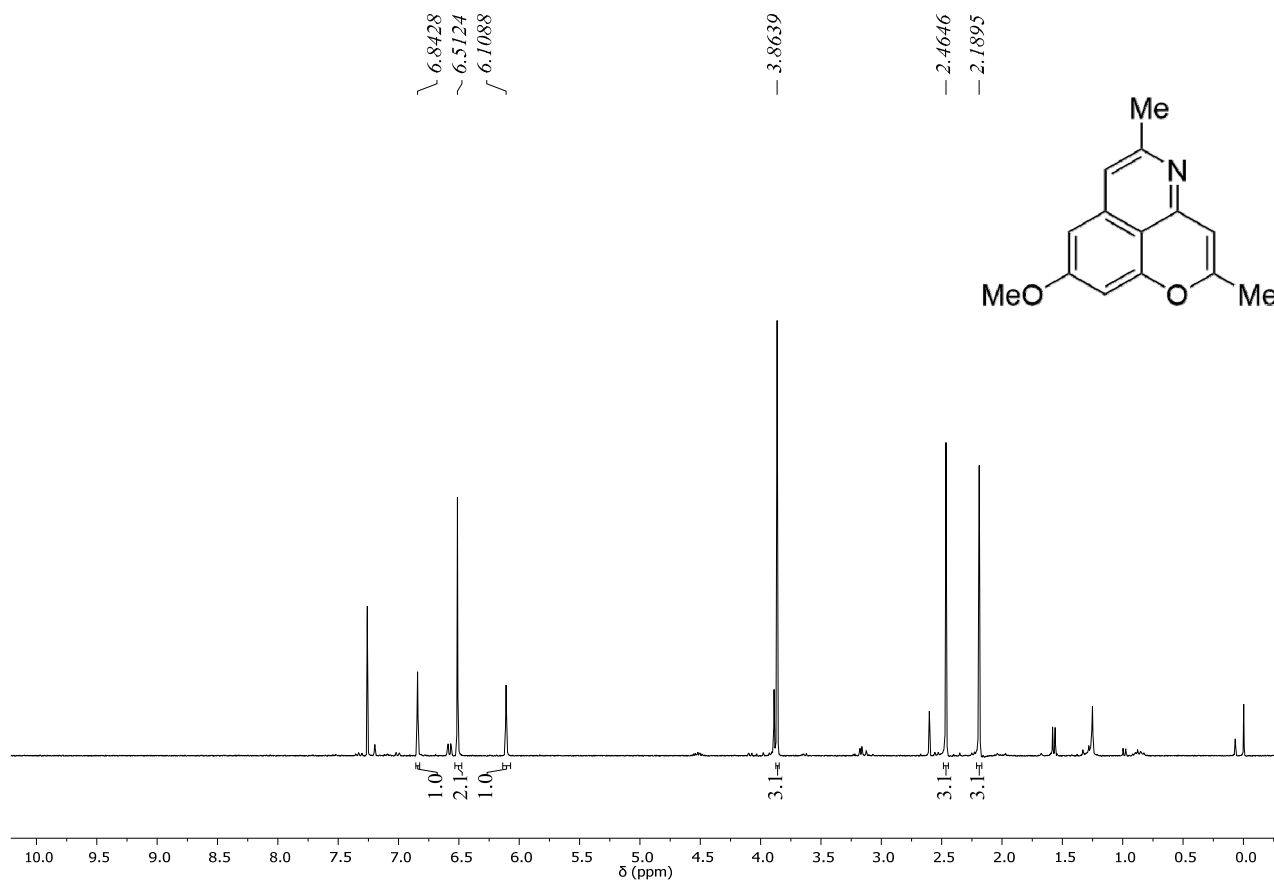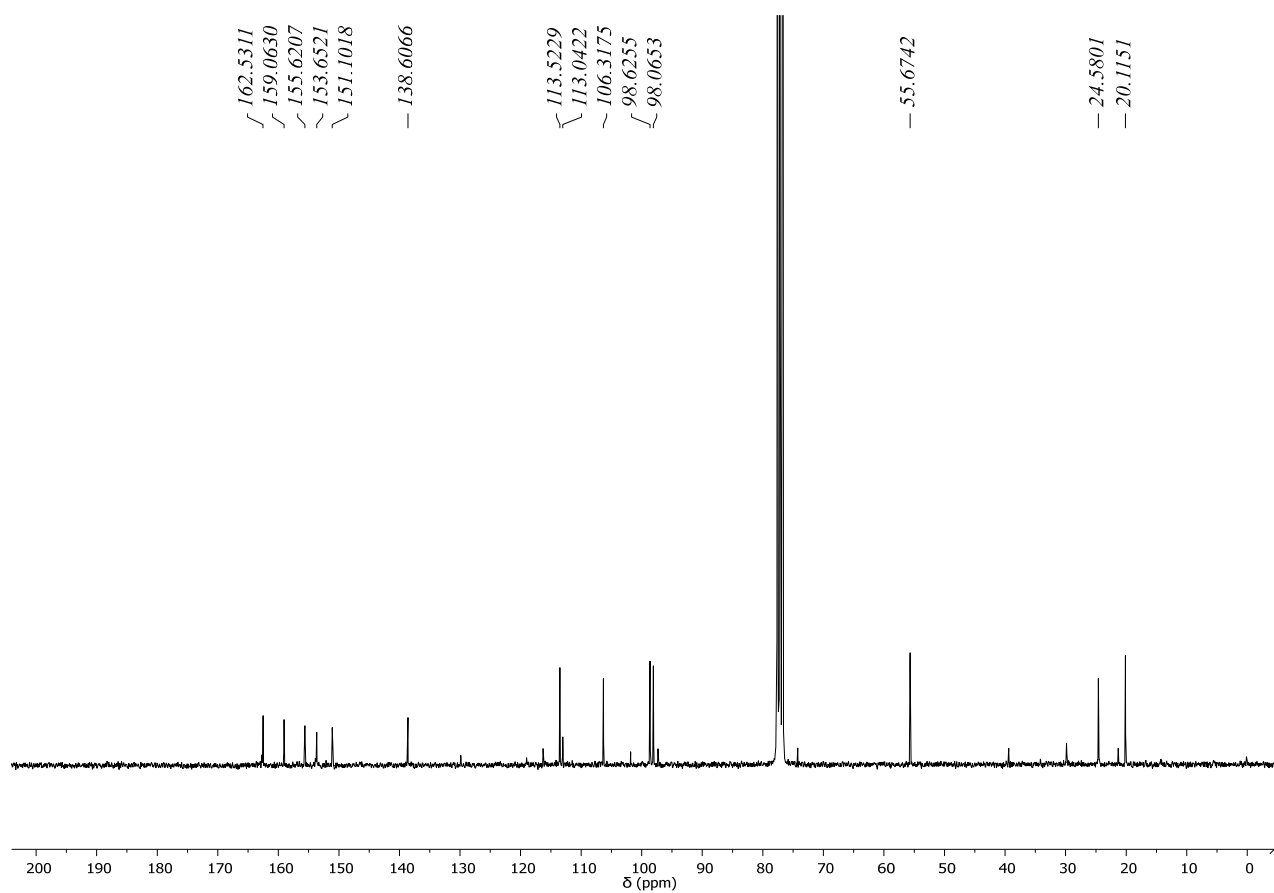

**Figure S37:** 300 MHz  $^1\text{H}$  (top) and 75 MHz  $^{13}\text{C}\{^1\text{H}\}$  (bottom) NMR spectra of compound **1m** in  $\text{CDCl}_3$ .



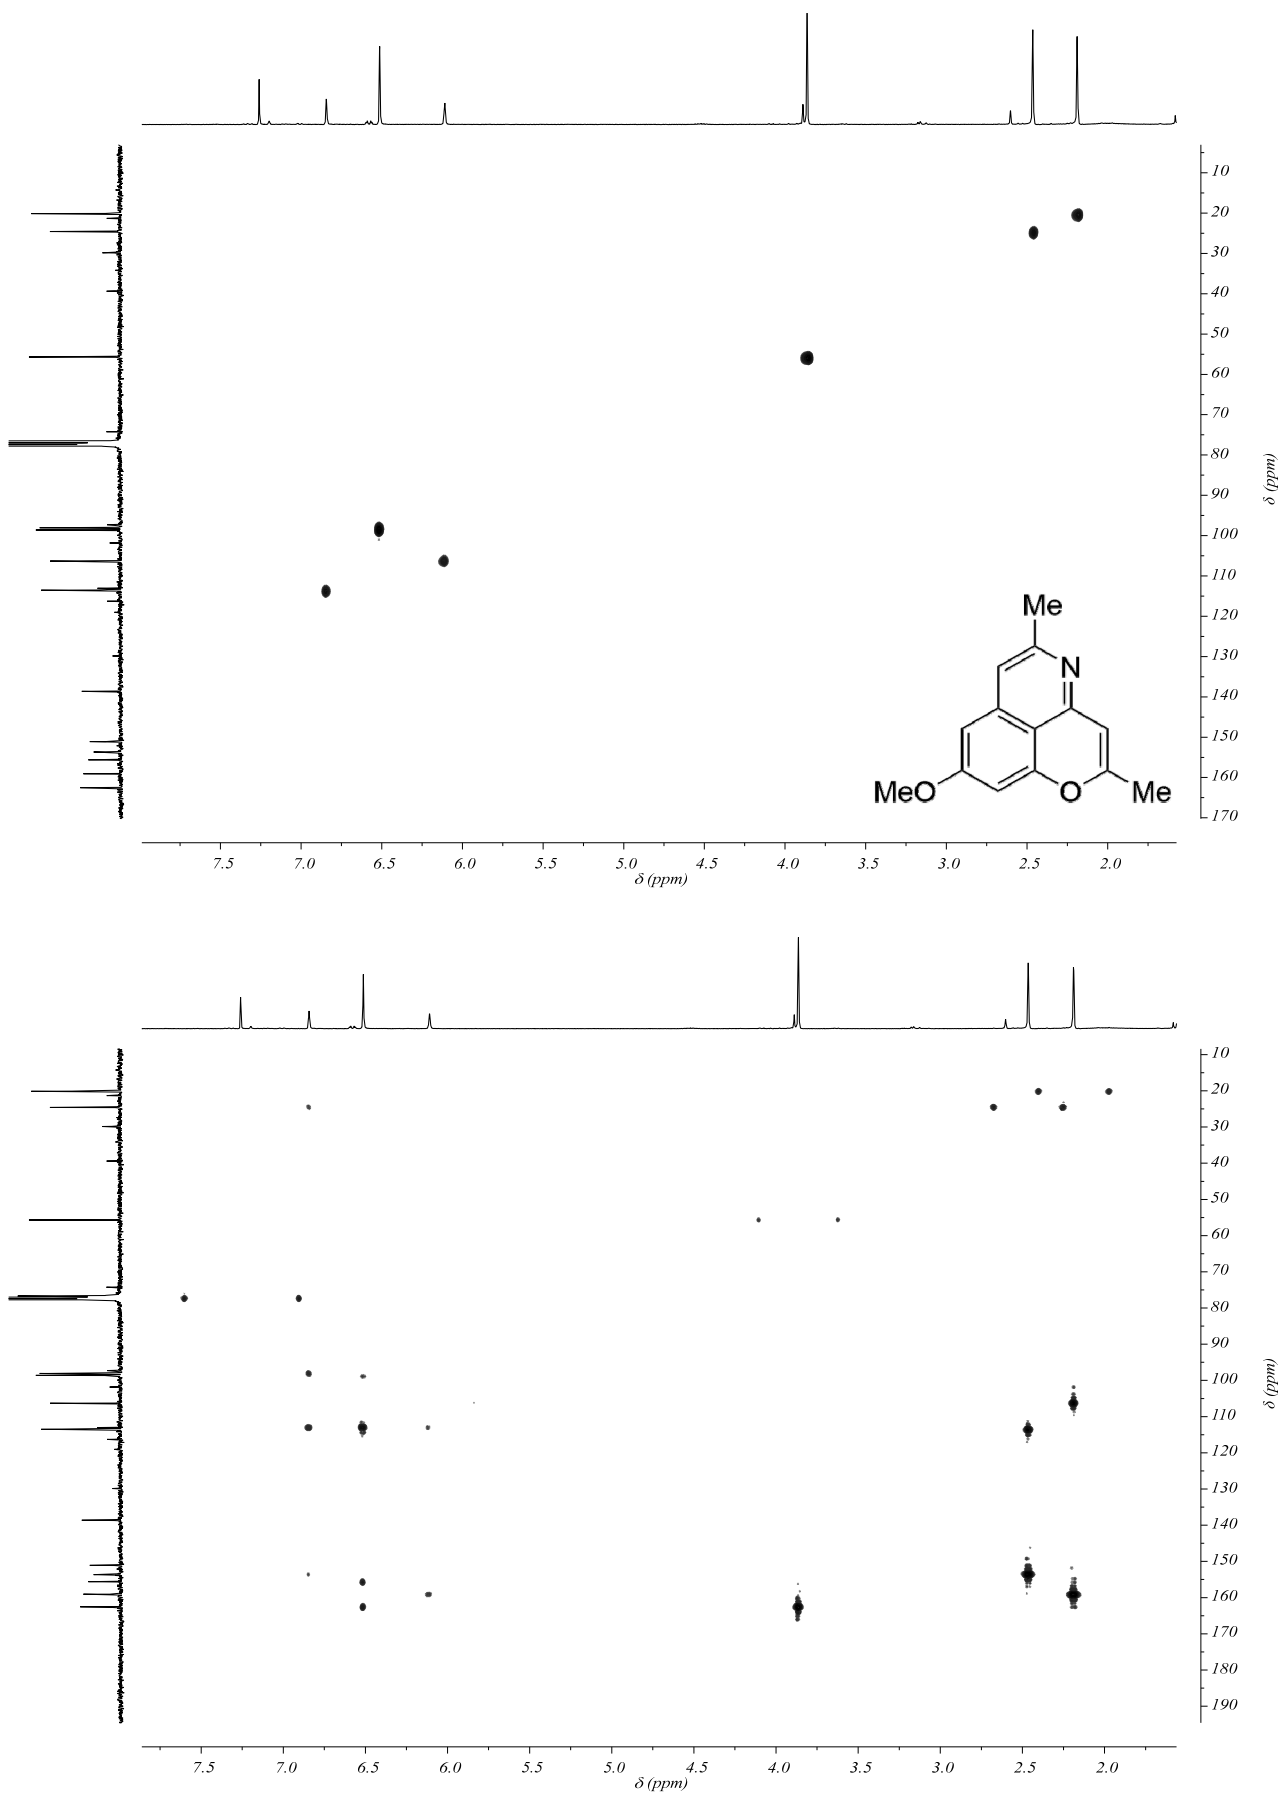

**Figure S38:** HSQC (top) and HMBC (bottom) spectra of compound **1m** in CDCl<sub>3</sub>.

**Table S1.** Reaction conditions for formation of 7-methoxy-2-methylchroman-4-one (**10**).<sup>a</sup>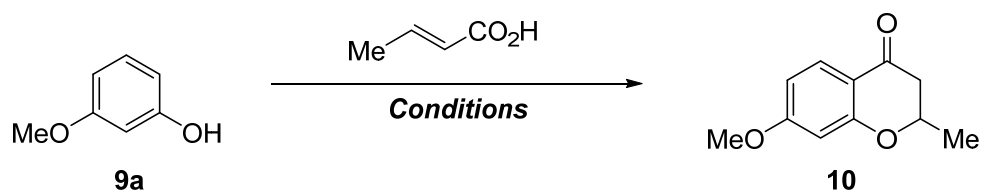

| Entry<br>N° | Conditions                         |                                 |            |          | Yield<br>(%) <sup>b</sup> |
|-------------|------------------------------------|---------------------------------|------------|----------|---------------------------|
|             | Promoter (equiv.)                  | Solvent                         | Temp. (°C) | Time (h) |                           |
| 1           | ZnCl <sub>2</sub> (2.0)            |                                 | 180        | 0.67     | 17                        |
| 2           | Bi(OTf) <sub>3</sub> (20 mol%)     | PhMe                            | 110        | 24       | 14                        |
| 3           | BF <sub>3</sub> ·OEt               |                                 | 80         | 18       | 0                         |
| 4           | MsOH                               |                                 | 90         | 20       | 13                        |
| 5           | MsOH                               |                                 | 100        | 20       | 18                        |
| 6           | MsOH/P <sub>2</sub> O <sub>5</sub> |                                 | 70         | 24       | 0                         |
| 7           | TfOH (5.0)                         | CH <sub>2</sub> Cl <sub>2</sub> | 40         | 36       | 5                         |
| 8           | TfOH (5.0)                         | DCE                             | 90         | 6        | 73                        |
| 9           | TfOH (2.5)                         | DCE                             | 90         | 6        | 17                        |
| 10          | MsOH (5.0)                         | DCE                             | 90         | 6        | 0                         |

<sup>a</sup>The reactions were run using **1** (0.8 mmol) and crotonic acid (0.88 mmol).

<sup>b</sup>Yield isolated by column chromatography.

**Table S2.** Optimization of reaction conditions with isopropenyl acetate (**13**).<sup>a</sup>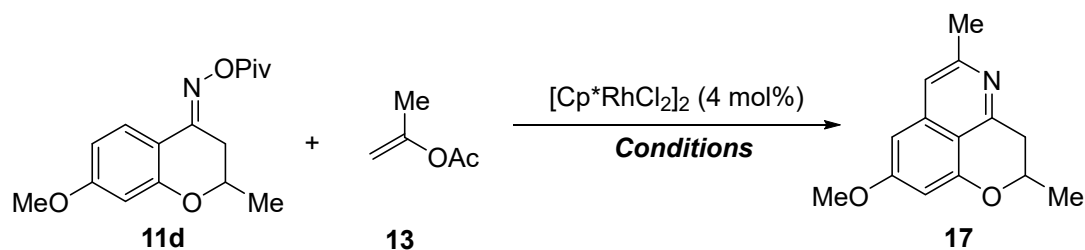

| Entry N <sup>o</sup> | [Ag] salt          | Oxidant (equiv.) | Additive (equiv.)                          | Solvent        | Temp. (°C) | Yield (%) |    |    |    |
|----------------------|--------------------|------------------|--------------------------------------------|----------------|------------|-----------|----|----|----|
|                      |                    |                  |                                            |                |            | 12        | 6  | 4  | 2  |
| 1 <sup>b</sup>       | AgSbF <sub>6</sub> | -                | -                                          | MeOH           | 100        | 8         | 0  | 0  | 52 |
| 2                    | AgSbF <sub>6</sub> | -                | -                                          | MeOH           | 100        | 30        | 0  | 27 | 39 |
| 3                    | AgBF <sub>4</sub>  | -                | -                                          | MeOH           | 100        | 19        | 0  | 17 | 36 |
| 4                    | AgSbF <sub>6</sub> | -                | -                                          | TFE            | 100        | 16        | 40 | 0  | 30 |
| 5                    | AgSbF <sub>6</sub> | -                | -                                          | <i>t</i> -BuOH | 100        | 30        | 7  | 0  | 44 |
| 6                    | AgSbF <sub>6</sub> | -                | -                                          | HFIP           | 100        | 18        | 0  | 0  | 58 |
| 7                    | AgSbF <sub>6</sub> | -                | -                                          | DCE            | 100        | 4         | 19 | 0  | 36 |
| 8 <sup>c</sup>       | AgSbF <sub>6</sub> | -                | -                                          | -              | 100        | 22        | 0  | 0  | 32 |
| 9 <sup>b,d</sup>     | AgSbF <sub>6</sub> | -                | -                                          | MeOH           | 120        | 25        | 0  | 0  | 36 |
| 10 <sup>d</sup>      | AgSbF <sub>6</sub> | -                | -                                          | MeOH           | 120        | 31        | 4  | 0  | 47 |
| 11 <sup>d</sup>      | AgSbF <sub>6</sub> | -                | -                                          | <i>t</i> -BuOH | 120        | 18        | 19 | 0  | 33 |
| 12                   | AgSbF <sub>6</sub> | -                | -                                          | HFIP:MeCN      | 90         | 4         | 20 | 0  | 50 |
| 14 <sup>e</sup>      | -                  | -                | CsOAc (0.3)                                | MeOH           | 70         | 12        | 42 | 42 | 0  |
| 15 <sup>e</sup>      | -                  | -                | CsOAc (0.3)                                | MeOH           | 100        | 12        | 0  | 23 | 34 |
| 16 <sup>e</sup>      | -                  | -                | Zn(OAc) <sub>2</sub> (0.5),<br>PivOH (0.5) | DCE            | 100        | 9         | 21 | 0  | 0  |
| 17                   | AgSbF <sub>6</sub> | AgOAc (1.0)      | -                                          | MeOH           | 60         | 11        | 30 | 23 | 0  |
| 18                   | AgSbF <sub>6</sub> | AgOAc (1.0)      | MS                                         | HFIP           | 100        | 12        | 54 | 0  | 11 |
| 19                   | AgSbF <sub>6</sub> | AgOAc (2.0)      | PivOH (3.0)                                | DCE            | 90         | 11        | 27 | 0  | 0  |

<sup>a</sup>General reaction conditions unless otherwise specified: **6** (0.15 mmol), **8** (0.45 mmol), [RhCp\*Cl<sub>2</sub>]<sub>2</sub> (4 mol%), AgSbF<sub>6</sub> (20 mol%), oxidant, additive, solvent (1 mL) under Ar atmosphere for 56 h in pressure tubes. <sup>b</sup>*O*-acetyl oxime **5** was used as a starting material. <sup>c</sup>Isopropenyl acetate (**8**) was used as the solvent. <sup>d</sup>24 h. <sup>e</sup>The reaction was carried out using **8** (1.5 mmol) for 72 h.

**Table S3.** H/D-exchange reaction of **1d**.<sup>a</sup>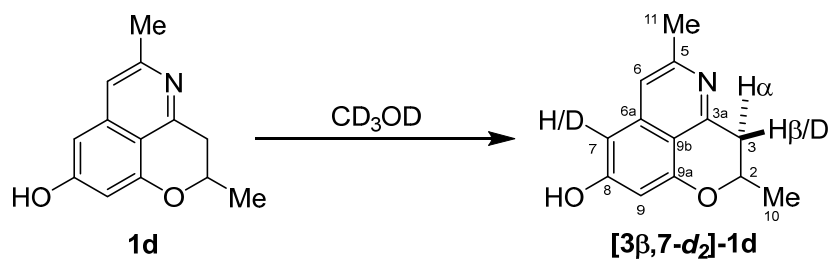

| Entry N° | Time (h) | Integral H-6 | Integral H-7 | Integral H-3 $\beta$ |
|----------|----------|--------------|--------------|----------------------|
| 1        | 16       | 1            | 0.4199       | 0.8991               |
| 2        | 20       | 1            | 0.3717       | 0.8782               |
| 3        | 38       | 1            | 0.2355       | 0.8072               |
| 4        | 44       | 1            | 0.2002       | 0.7843               |
| 5        | 72       | 1            | 0.0964       | 0.6736               |
| 6        | 110      | 1            | 0.0515       | 0.5526               |
| 7        | 158      | 1            | 0.0387       | 0.4319               |

<sup>a</sup>H/D-exchange reaction was monitored by <sup>1</sup>H NMR of a ~0.02 M solution of **1d** in CD<sub>3</sub>OD. The measuring temperature was 25 °C inside the device and the NMR tube was kept at room temperature (25 °C) between measurements.

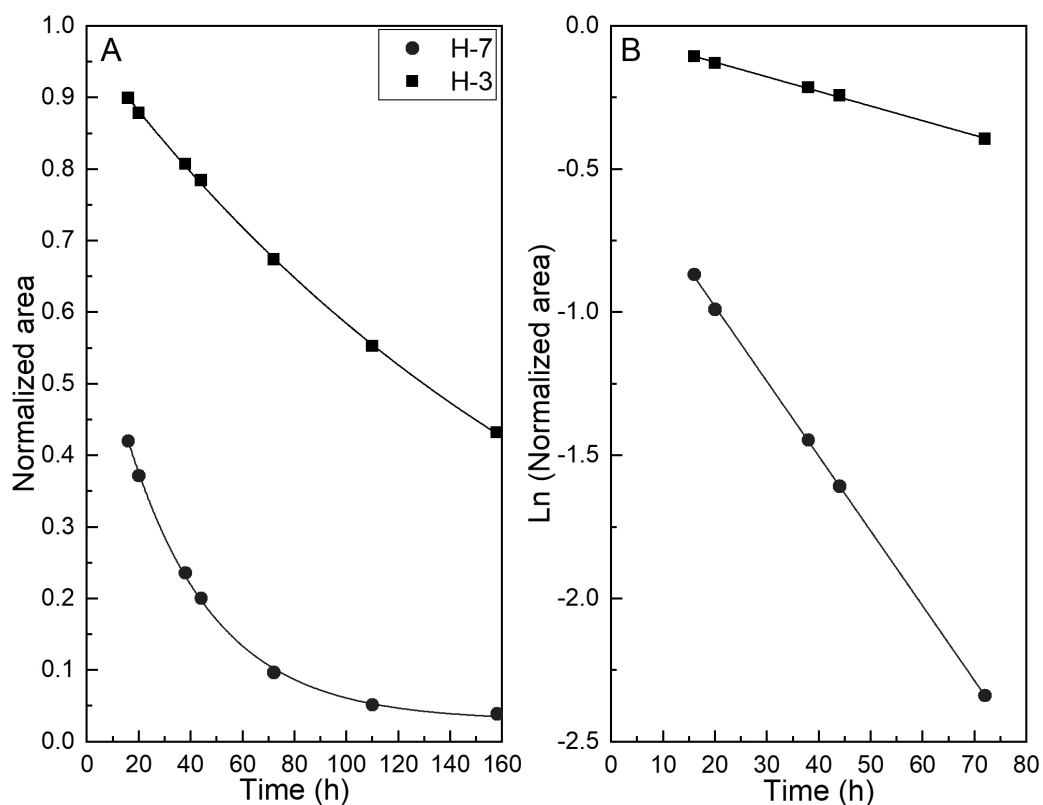

**Figure S39.** A) H/D exchange of compound **1d** at the H-3 $\beta$  (■) and H-7 (●) sites. B) Semilogarithmic representation of the data in the time interval 20-72 h.

For the equation: Area of H-3 =  $A \cdot \exp(-t/t_1) + y_0$

$$y_0 = -0.05055 \pm 0.06092$$

$$A = 1.02571 \pm 0.05759$$

$$t_1 = 208.70786 \pm 18.29862$$

$$n = 7$$

$$r^2 = 0.99974$$

$$\text{Adj. } r^2 = 0.99961$$

For the equation:  $\ln(\text{Area of H-3}) = y_0 + b \cdot t$

$$y_0 = -0.02364 \pm 0.00475$$

$$b = -0.00511 \pm 1.10666E-4$$

$$n = 5$$

$$\text{Pearson's } r = -0.9993$$

$$k_{\text{obs}} (\text{s}^{-1}) = -b/3600 = 1.42E-6$$

$$t_{1/2} (\text{h}) = -\ln(2)/b = 136$$

For the equation: Area of H-7 =  $A \cdot \exp(-t/t_1) + y_0$

$$y_0 = 0.02976 \pm 0.00433$$

$$A = 0.62867 \pm 0.01132$$

$$t_1 = 33.37459 \pm 1.16967$$

$$n = 8$$

$$r^2 = 0.99937$$

$$\text{Adj. } r^2 = 0.99905$$

For the equation:  $\ln(\text{Area of H-7}) = y_0 + b \cdot t$

$$y_0 = -0.45689 \pm 0.0073$$

$$b = -0.02614 \pm 1.70075E-4$$

$$n = 5$$

$$\text{Pearson's } r = -0.99994$$

$$k_{\text{obs}} (\text{s}^{-1}) = -b/3600 = 7.26E-6$$

$$t_{1/2} (\text{h}) = -\ln(2)/b = 26.5$$

**Table S4.** Spectroscopic comparison of <sup>1</sup>H NMR data of cassiarin C (**1d**).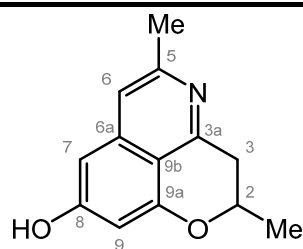

| Proton N° | Morita & Co-Workers: <sup>1</sup><br>(CD <sub>3</sub> OD, 400 MHz)        | Hibino & Co-Workers: <sup>2</sup><br>(CD <sub>3</sub> OD, 300 MHz) | This Report:<br>(CD <sub>3</sub> OD, 400 MHz)                             | Δδ<br>(ppm)    |
|-----------|---------------------------------------------------------------------------|--------------------------------------------------------------------|---------------------------------------------------------------------------|----------------|
| 2-Me      | 1.56 (d, <i>J</i> = 6.0)                                                  | 1.54 (d, <i>J</i> = 6.2)                                           | 1.52 (d, <i>J</i> = 6.3)                                                  | -0.04          |
| 2         | 4.53–4.45 (m)                                                             | 4.53–4.41 (m)                                                      | 4.55–4.42 (m)                                                             | -0.07          |
| 3         | 3.13 (dd, <i>J</i> = 16.8 and 3.2)<br>3.06 (dd, <i>J</i> = 16.8 and 10.9) | 3.18–2.27 (m)                                                      | 3.10 (dd, <i>J</i> = 16.8 and 3.3)<br>2.99 (dd, <i>J</i> = 16.8 and 11.0) | -0.03<br>-0.07 |
| 5-Me      | 2.53 (s)                                                                  | 2.52 (s)                                                           | 2.50 (s)                                                                  | -0.03          |
| 6         | 7.20 (s)                                                                  | 7.19 (s)                                                           | 7.13 (s)                                                                  | -0.07          |
| 7         | 6.57 (d, <i>J</i> = 2.0)                                                  | 6.57 (d, <i>J</i> = 2.0)                                           | 6.54 (d, <i>J</i> = 2.1)                                                  | -0.03          |
| 9         | 6.48 (d, <i>J</i> = 2.0)                                                  | 6.47 (d, <i>J</i> = 2.0)                                           | 6.45 (d, <i>J</i> = 2.1)                                                  | -0.03          |

**Table S5.** Spectroscopic comparison of  $^{13}\text{C}\{^1\text{H}\}$  NMR data of cassiarin C (**1d**).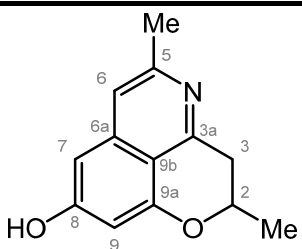

| Carbon N <sup>o</sup> | Morita & Co-Workers: <sup>1</sup><br>(CD <sub>3</sub> OD, 100 MHz) | Hibino & Co-Workers: <sup>2</sup><br>(CD <sub>3</sub> OD, 75 MHz) | This Report:<br>(CD <sub>3</sub> OD, 100 MHz) | $\Delta\delta$<br>(ppm) |
|-----------------------|--------------------------------------------------------------------|-------------------------------------------------------------------|-----------------------------------------------|-------------------------|
| 2                     | 73.7                                                               | 75.1                                                              | 75.0                                          | +1.7                    |
| 2-Me                  | 19.9                                                               | 21.3                                                              | 21.3                                          | +1.4                    |
| 3                     | 37.8                                                               | 39.1                                                              | 39.1                                          | +1.3                    |
| 3a                    | 153.6                                                              | 155.1                                                             | 155.0                                         | +1.4                    |
| 5                     | 149.9                                                              | 151.1                                                             | 151.3                                         | +1.4                    |
| 5-Me                  | 22.1                                                               | 23.4                                                              | 23.5                                          | +1.4                    |
| 6                     | 115.6                                                              | 117.1                                                             | 117.0                                         | +1.4                    |
| 6a                    | 139.1                                                              | 140.5                                                             | 140.4                                         | +1.3                    |
| 7                     | 100.0                                                              | 101.4                                                             | 101.3                                         | +1.3                    |
| 8                     | 159.1                                                              | 163.6                                                             | 163.4                                         | +4.3                    |
| 9                     | 103.1                                                              | 103.3                                                             | 103.3                                         | +0.2                    |
| 9a                    | 156.9                                                              | 158.4                                                             | 158.3                                         | +1.4                    |
| 9b                    | 110.6                                                              | 111.5                                                             | 111.4                                         | +0.8                    |

**Table S6.** Spectroscopic comparison of <sup>1</sup>H NMR data of 8-*O*-Methyl cassiarin A (**1m**).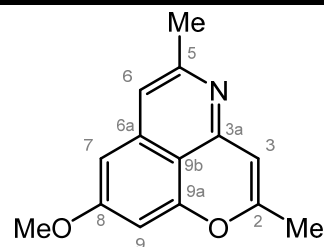

| Proton N° | Morita & Co-Workers: <sup>3</sup><br>(CD <sub>3</sub> OD, 400 MHz) | This Report:<br>(CD <sub>3</sub> OD, 400 MHz) | $\Delta\delta$<br>(CD <sub>3</sub> OD, ppm) | Ye & Co-Workers: <sup>4</sup><br>(CDCl <sub>3</sub> , 500 MHz) | This Report:<br>(CDCl <sub>3</sub> , 300 MHz) | $\Delta\delta$<br>(CDCl <sub>3</sub> , ppm) |
|-----------|--------------------------------------------------------------------|-----------------------------------------------|---------------------------------------------|----------------------------------------------------------------|-----------------------------------------------|---------------------------------------------|
| 2-Me      | 2.21 (d, <i>J</i> = 0.8)                                           | 2.21 (d, <i>J</i> = 0.8)                      | 0.00                                        | 2.23 (s)                                                       | 2.19 (s)                                      | +0.04                                       |
| 3         | 6.09 (d, <i>J</i> = 0.8)                                           | 6.09 (q, <i>J</i> = 0.8)                      | 0.00                                        | 6.14 (s)                                                       | 6.11 (br s)                                   | +0.03                                       |
| 5-Me      | 2.41 (s)                                                           | 2.40 (s)                                      | +0.01                                       | 2.38 (s)                                                       | 2.46 (s)                                      | -0.08                                       |
| 6         | 6.94 (s)                                                           | 6.94 (s)                                      | 0.00                                        | 6.74 (s)                                                       | 6.84 (s)                                      | -0.10                                       |
| 7         | 6.57 (d, <i>J</i> = 2.1)                                           | 6.57 (d, <i>J</i> = 2.1)                      | 0.00                                        | 6.52 (s)                                                       | 6.51 (s)*                                     | +0.01                                       |
| 8-OMe     | 3.88 (s)                                                           | 3.87 (s)                                      | +0.01                                       | 3.80 (s)                                                       | 3.86 (s)                                      | -0.06                                       |
| 9         | 6.67 (d, <i>J</i> = 2.1)                                           | 6.67 (d, <i>J</i> = 2.1)                      | 0.00                                        | 6.58 (s)                                                       | 6.51 (s)*                                     | +0.07                                       |



**Table S7.** Spectroscopic comparison of  $^{13}\text{C}\{^1\text{H}\}$  NMR data of 8-*O*-Methyl cassiarin A (**1m**).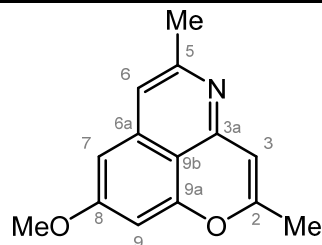

| Carbon N° | Ye & Co-Workers: <sup>3</sup><br>(CDCl <sub>3</sub> , 125 MHz) | Morita & Co-Workers: <sup>4</sup><br>(CD <sub>3</sub> OD, 100 MHz) | This Report:<br>(CDCl <sub>3</sub> , 75 MHz) | This Report:<br>CD <sub>3</sub> OD, 100 MHz) | $\Delta\delta$<br>(CDCl <sub>3</sub> , ppm) | $\Delta\delta$<br>(CD <sub>3</sub> OD, ppm) |
|-----------|----------------------------------------------------------------|--------------------------------------------------------------------|----------------------------------------------|----------------------------------------------|---------------------------------------------|---------------------------------------------|
| 2         | 162.4 (s)                                                      | 160.3                                                              | 159.1                                        | 161.6                                        | -3.3                                        | +1.3                                        |
| 2-Me      | 21.2 (q)                                                       | 18.5                                                               | 20.1                                         | 19.8                                         | -1.1                                        | -1.1                                        |
| 3         | 104.2 (d)                                                      | 103.8                                                              | 106.3                                        | 105.5                                        | +2.2                                        | +1.7                                        |
| 3a        | 151.6 (s)                                                      | 150.5                                                              | 151.1                                        | 152.2                                        | -0.5                                        | +1.7                                        |
| 5         | 148.6 (s)                                                      | -                                                                  | 153.6                                        | 153.5                                        | +5.0                                        | -                                           |
| 5-Me      | 23.5 (q)                                                       | 22.1                                                               | 24.6                                         | 23.8                                         | +1.1                                        | +1.7                                        |
| 6         | 114.5 (d)                                                      | 113.5                                                              | 113.5                                        | 114.9                                        | -1.0                                        | +1.4                                        |
| 6a        | 136.9 (s)                                                      | 138.4                                                              | 138.6                                        | 140.1                                        | +1.7                                        | +1.7                                        |
| 7         | 103.4 (d)                                                      | 98.2                                                               | 98.1                                         | 99.5                                         | -5.3                                        | +1.3                                        |
| 8         | 166.8 (s)                                                      | 163.1                                                              | 162.5                                        | 164.5                                        | -4.3                                        | +1.4                                        |
| 8-OMe     | 56.6 (s)                                                       | 54.8                                                               | 55.7                                         | 56.2                                         | -0.9                                        | +1.4                                        |
| 9         | 98.4 (d)                                                       | 98.2                                                               | 98.6                                         | 100.0                                        | +0.2                                        | +1.8                                        |
| 9a        | 155.5 (s)                                                      | 155.0                                                              | 155.6                                        | 156.6                                        | +0.05                                       | +1.6                                        |
| 9b        | 112.8 (s)                                                      | 112.0                                                              | 113.0                                        | 113.6                                        | +0.2                                        | +1.6                                        |

**Experiments aimed to perform the direct methoximation of chromenone **23**.**

**Table S8.** Transformation of chromenone **23** with methoxylamine hydrochloride.<sup>a</sup>

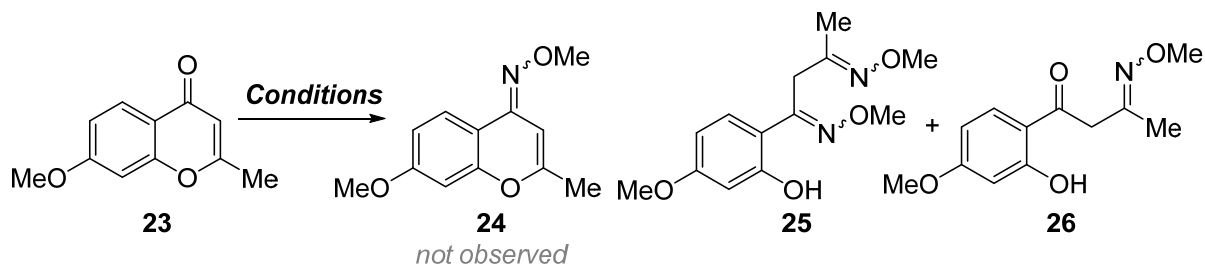

| Entry<br>N° | Conditions                          |                           |                  |         |             | Yield (%) |           |           |
|-------------|-------------------------------------|---------------------------|------------------|---------|-------------|-----------|-----------|-----------|
|             | MeONH <sub>2</sub> ·HCl<br>(equiv.) | Promoter<br>(equiv.)      | Base<br>(equiv.) | Solvent | Time<br>(h) | <b>23</b> | <b>25</b> | <b>26</b> |
| 1           | 2                                   | CeCl <sub>3</sub> (4%mol) | NaOAc<br>(2.0)   | MeOH    | 20          | 62        | 0         | 0         |
| 2           | 3                                   | -                         | Py               | Py      | 8           | 7         | 36        | 44        |
| 3           | 2                                   | CeCl <sub>3</sub> (4%mol) | Py               | Py      | 4           | 24        | 26        | 45        |

<sup>a</sup>The reactions were run under Ar atmosphere, using **23** (0.3 mmol) and at 60°C.

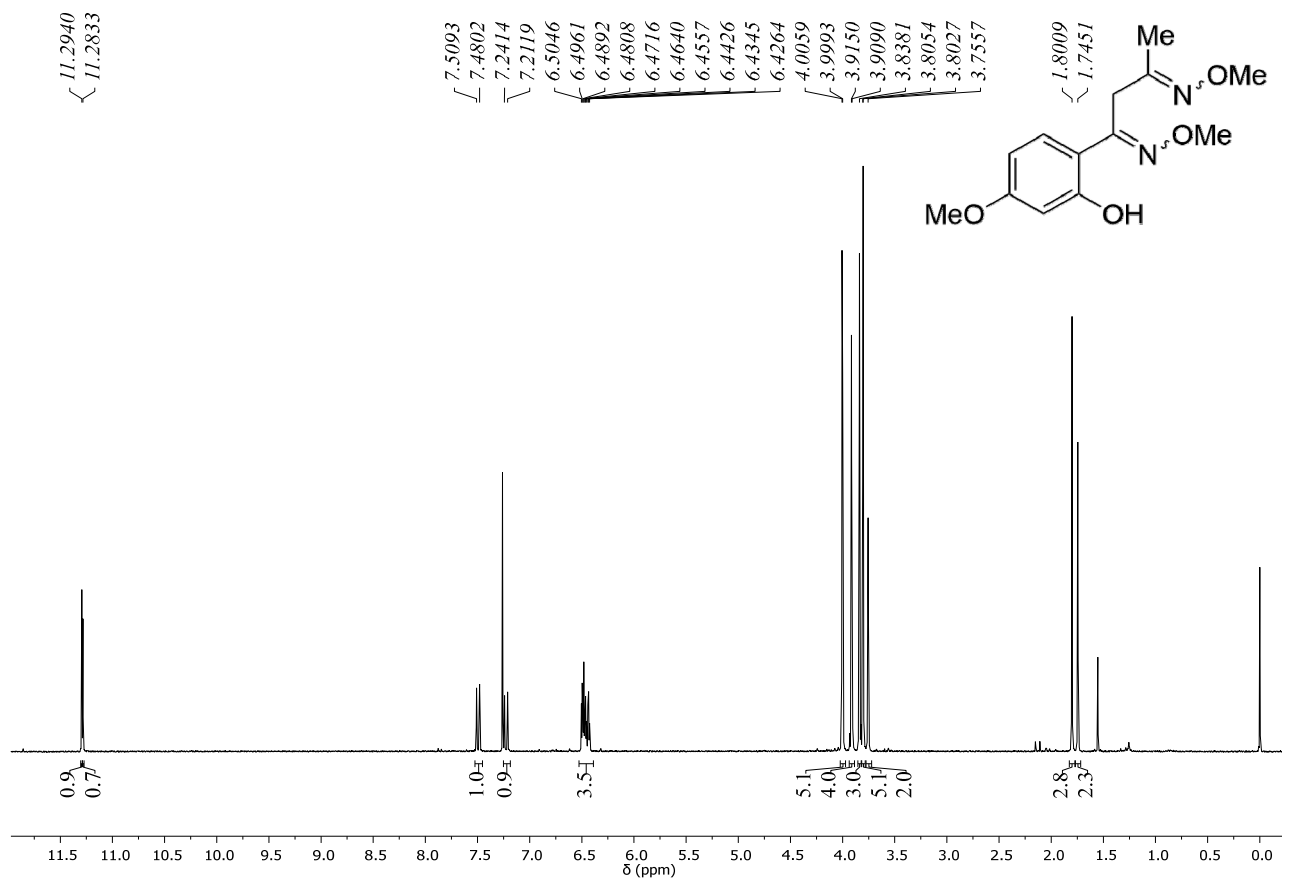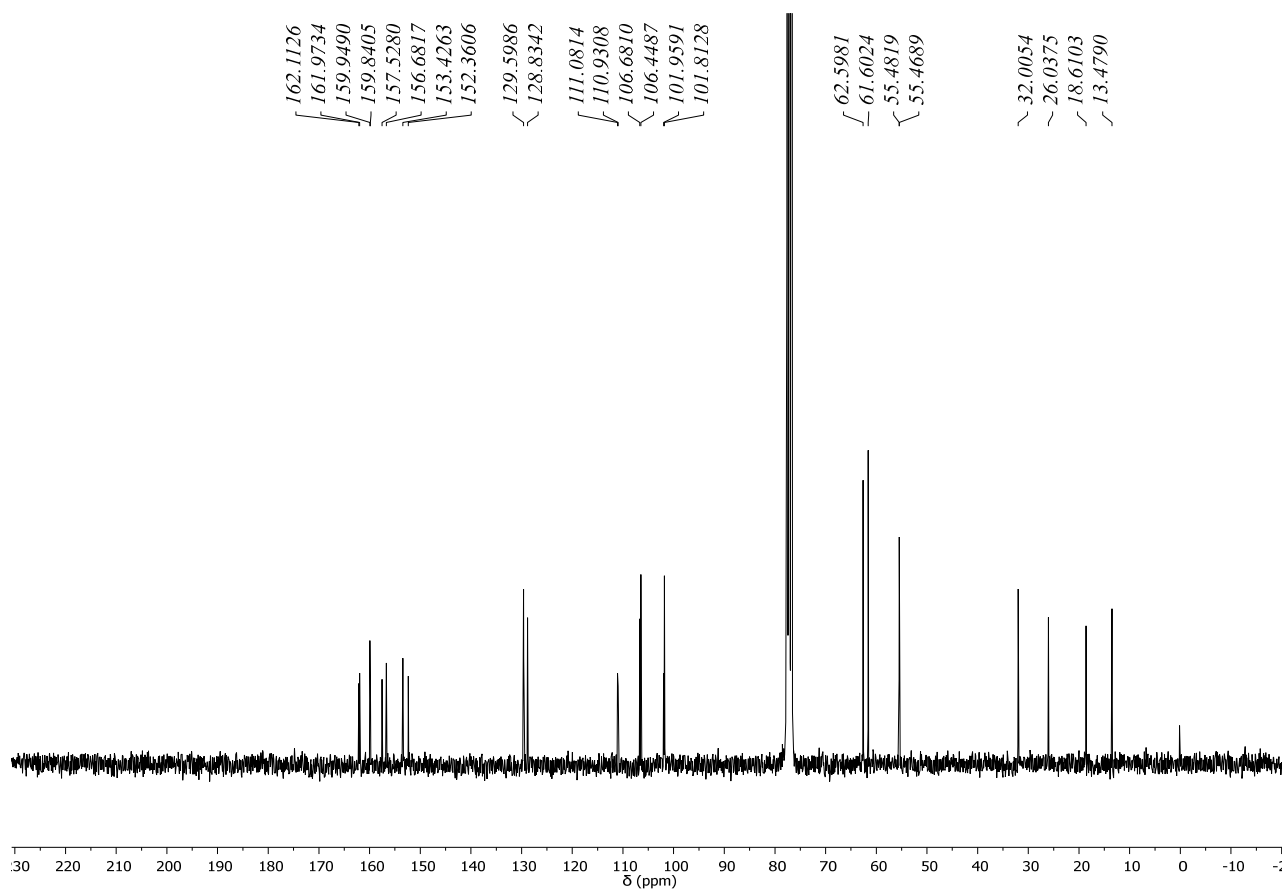

Figure S40: 300 MHz <sup>1</sup>H (top) and 75 MHz <sup>13</sup>C{<sup>1</sup>H} (bottom) NMR spectra of compound 25 in CDCl<sub>3</sub>.

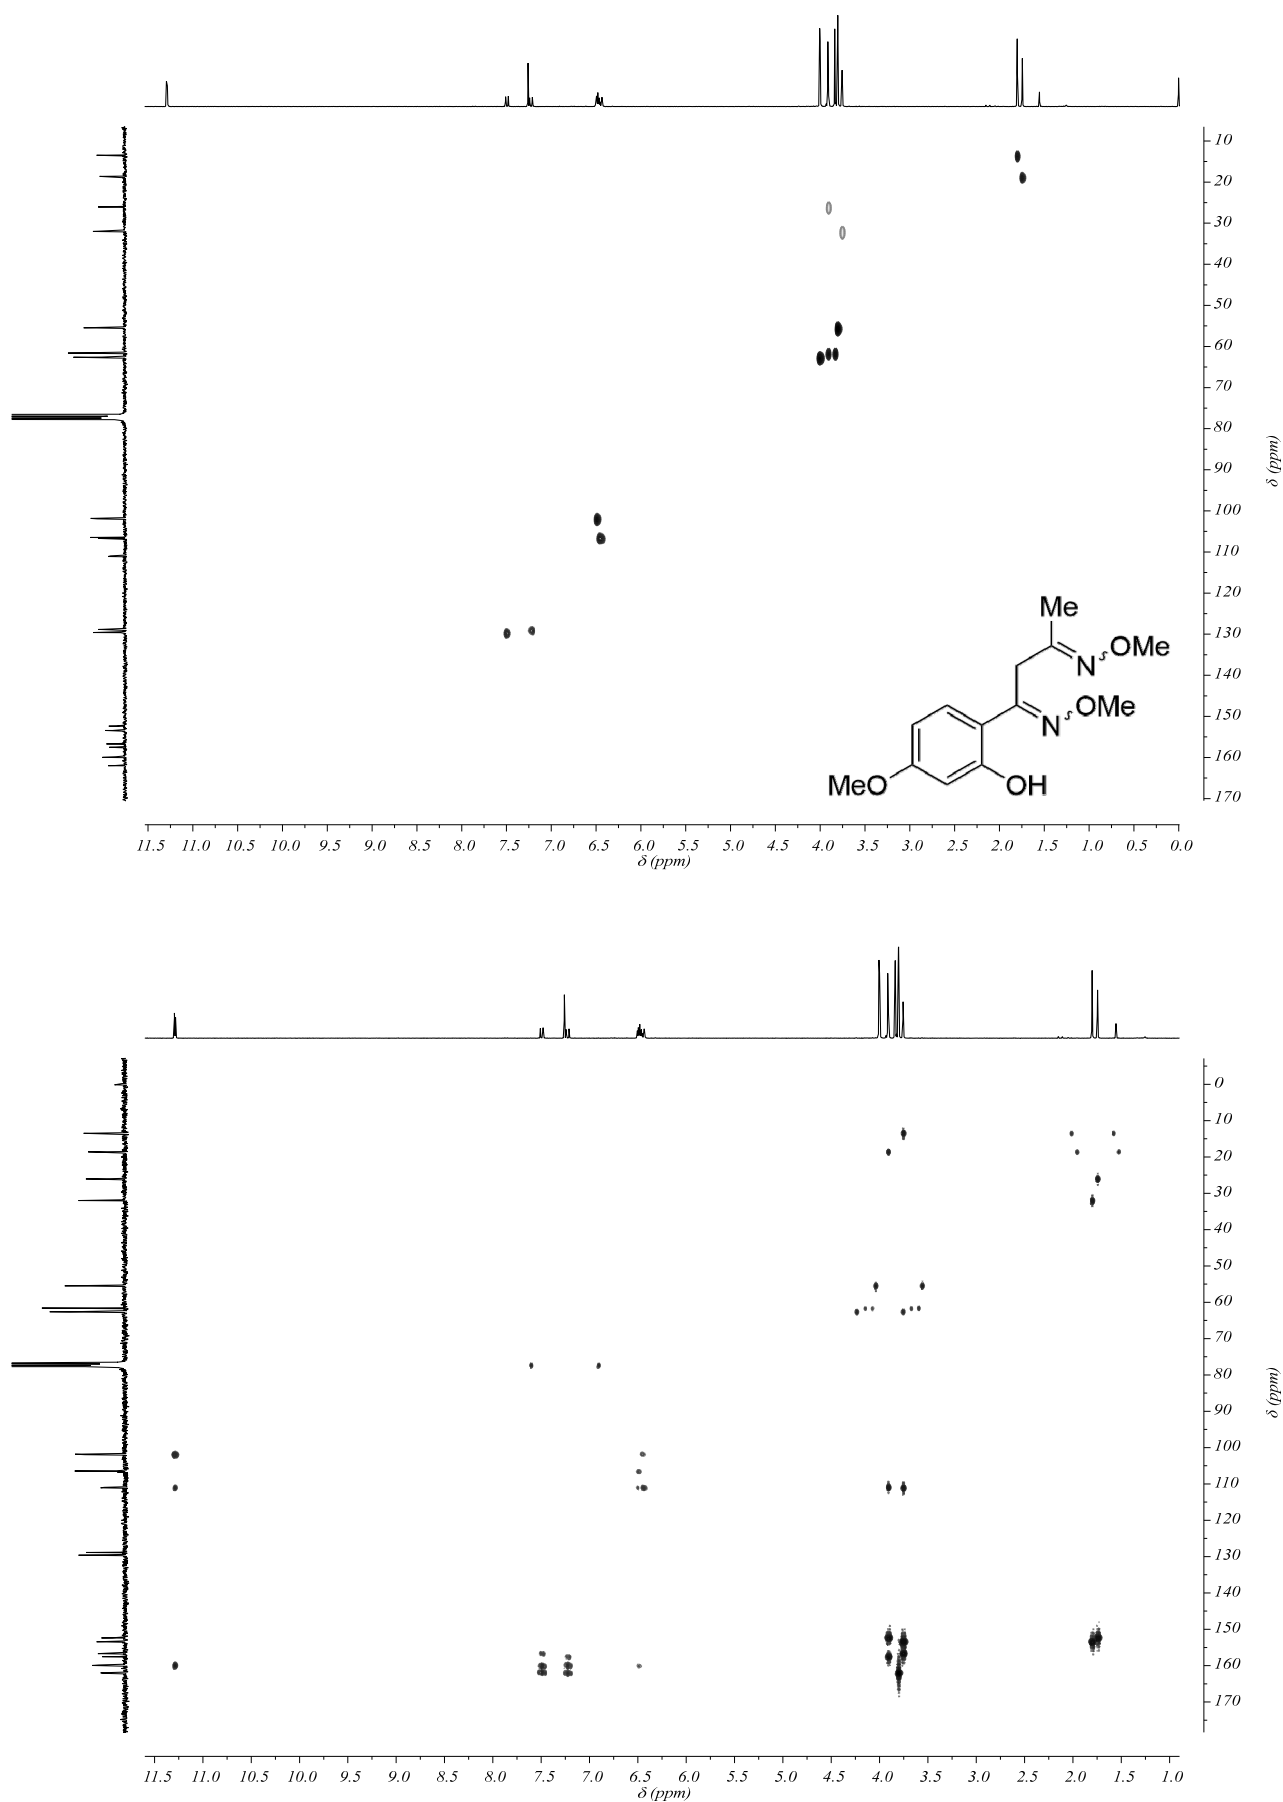

**Figure S41:** HSQC (top) and HMBC (bottom) spectra of compound **25** in CDCl<sub>3</sub>.

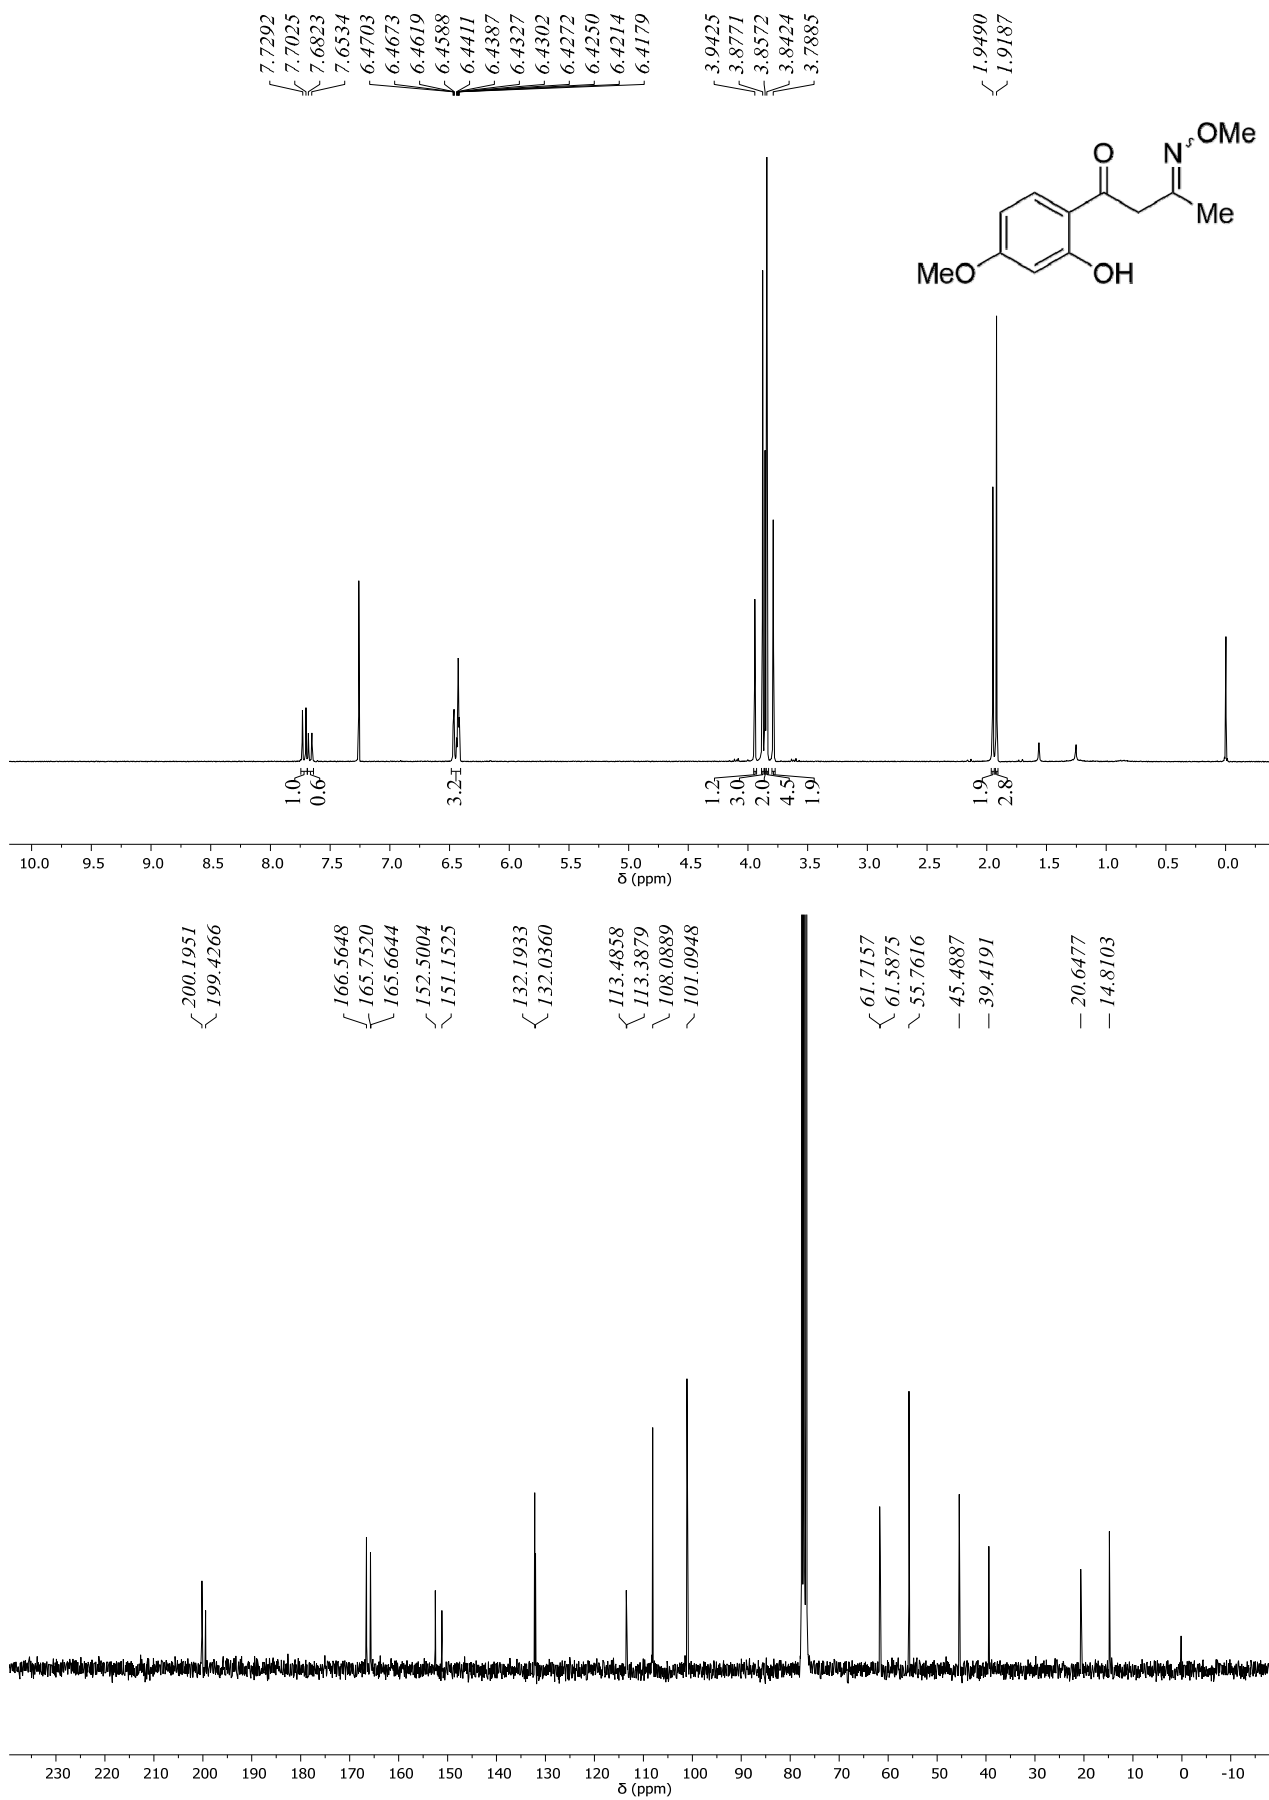

**Figure S42:** 300 MHz <sup>1</sup>H (top) and 75 MHz <sup>13</sup>C {<sup>1</sup>H} (bottom) NMR spectra of compound **26** in CDCl<sub>3</sub>.

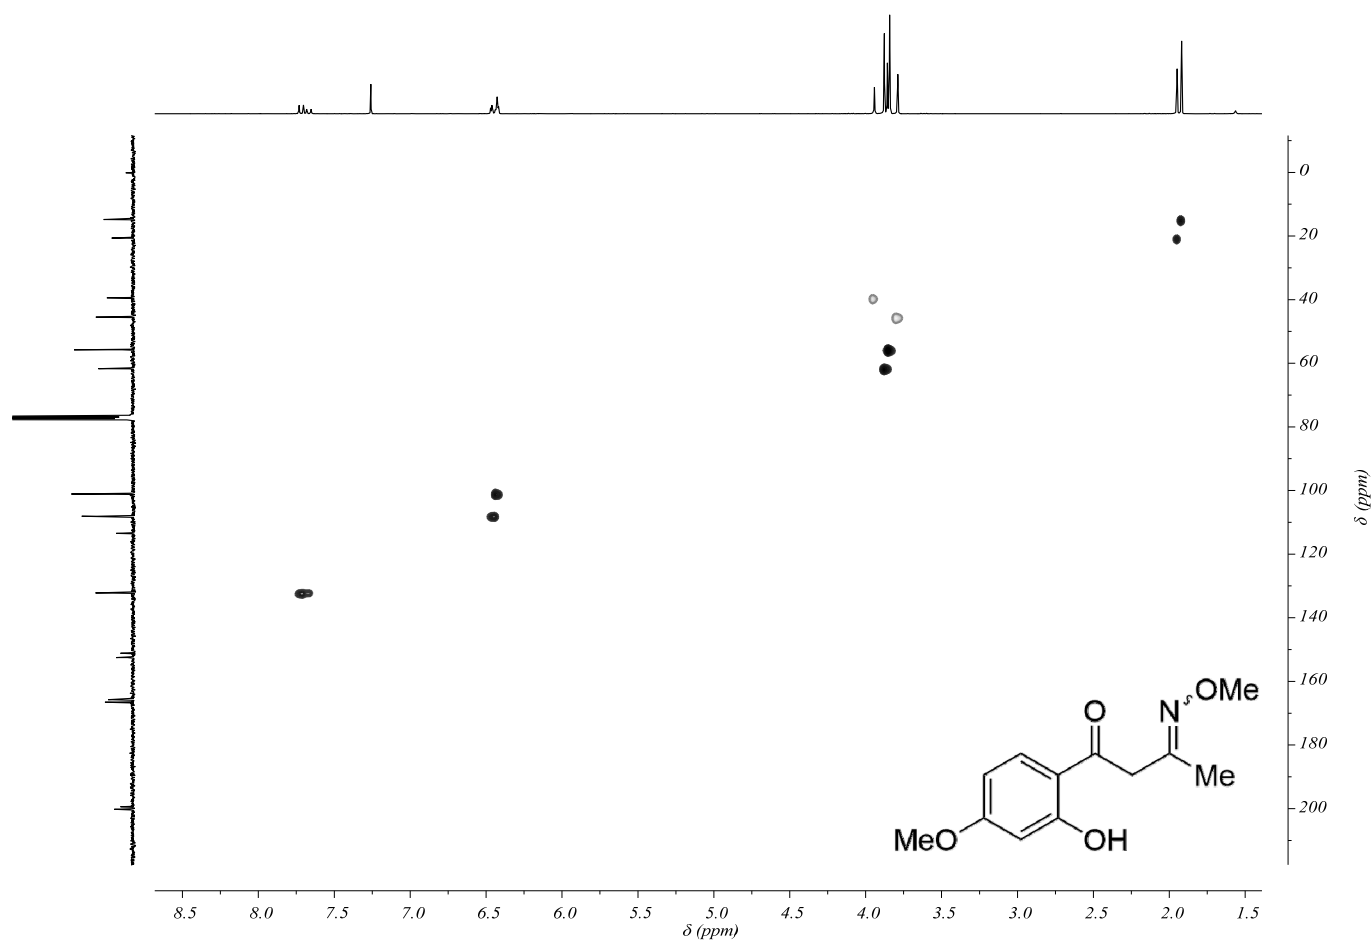

**Figure S43:** HSQC spectrum of compound **26** in  $\text{CDCl}_3$ .

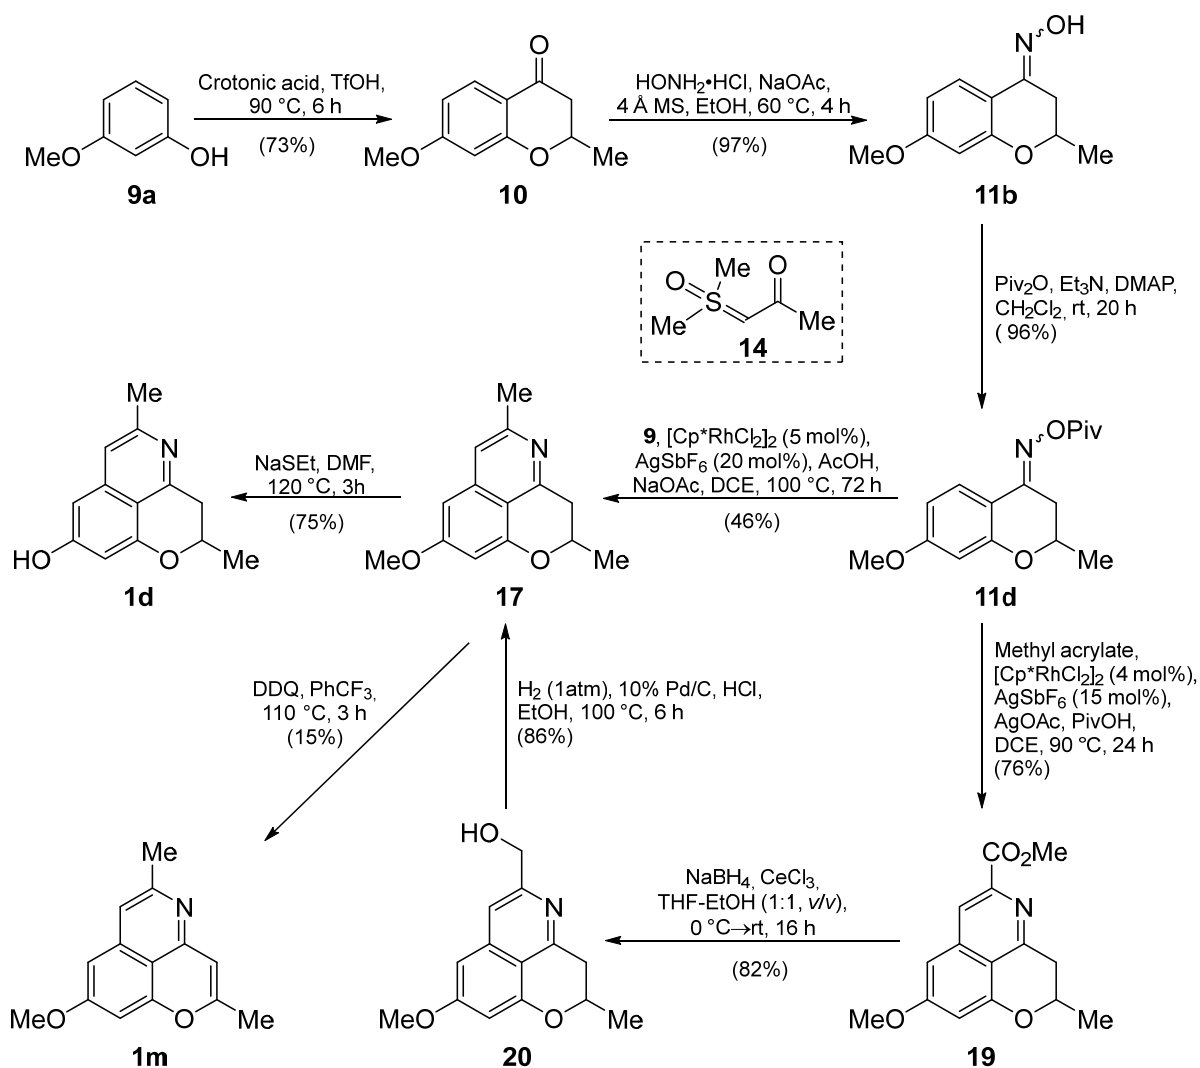

**Scheme S1.** Total synthesis of cassiarin C (**1d**) and 8-*O*-methylcassiarin A (**1m**).

## Computational Methods

Conformational searches for the reactants, transition states, and the products were run using the conformational search module of Hyperchem with the MM+ method.<sup>5</sup> Suitable structures were then successively optimized at the M062X/6-311+G\*\* level with Gaussian09,<sup>6</sup> including the solvent (MeOH,  $\epsilon=32.70$ ) via the Solvation Model based on Density (SMD).

Frequency calculations were made to confirm the nature of the stationary points and to evaluate their thermochemical properties. To confirm the presence of a transition state, imaginary frequency were computed and the obtained structure linked by intrinsic coordinate reaction calculations (IRCs). The molecular orbitals of the reactants were calculated to analyze the frontier orbital interactions at the M062X/6-311+G\*\* level of theory.

For energy optimization and frequency calculation of the deuterium-labeled compounds, the input was performed in Gaussview 5.0 and the isotopes were added with its module edit atom list. The thermodynamic parameters showed to be different to those calculated for H compounds.

The keywords used for the TS were:

```
# opt=(calcfc,ts,noeigentest) freq 6-311+g(d,p) scrf=(solvent=methanol,pcm,smd,dovacuum) m062x
temperature=298
```

The keywords used for the intermediates were:

```
# opt=(calcfc,noeigentest) freq 6-31g(d) scrf=(solvent=methanol,pcm,smd,dovacuum) m062x
temperature=298
```



Molecular orbitals of the starting materials and intermediates

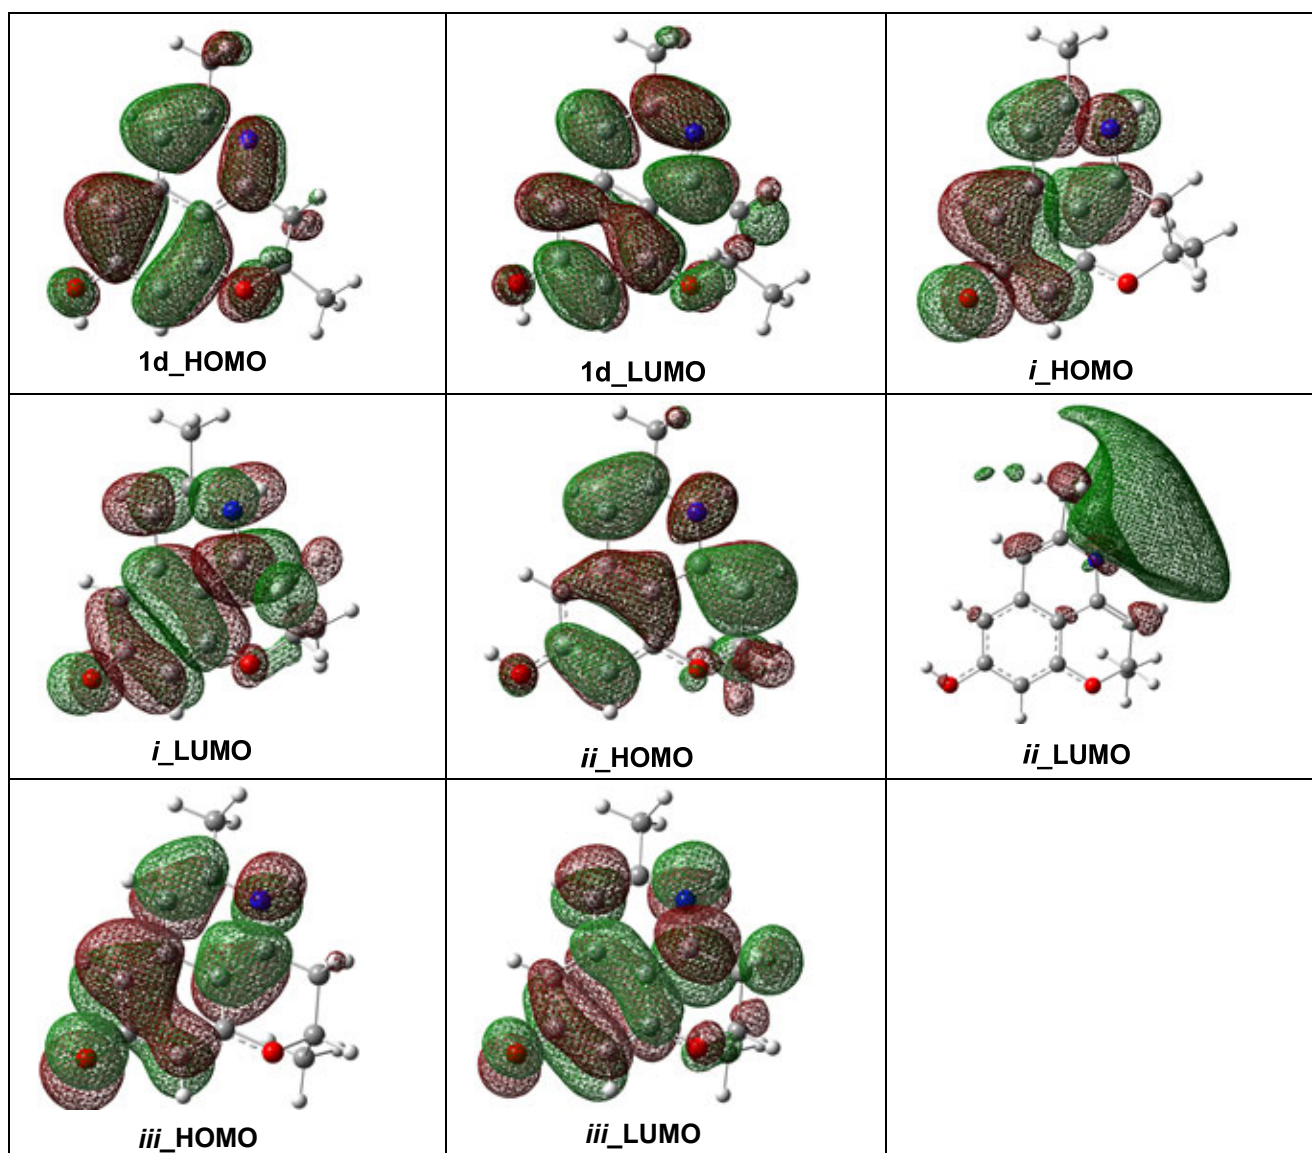

### Cartesian Coordinates

|                                                                                                    |                                                                                                                                           |
|----------------------------------------------------------------------------------------------------|-------------------------------------------------------------------------------------------------------------------------------------------|
| 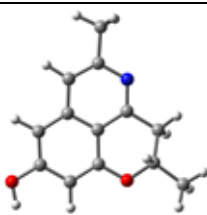 <p><b>1d</b></p> | M062x/6-311+G**<br>SCF: -708.3590008<br>Correction ZPE: 0.235918<br>Correction Free energy: 0.197064<br>Sum of free energies: -708.161937 |
|----------------------------------------------------------------------------------------------------|-------------------------------------------------------------------------------------------------------------------------------------------|

|     |             |             |             |
|-----|-------------|-------------|-------------|
| 0 1 |             |             |             |
| C   | 0.51978800  | 2.45727800  | 0.06161400  |
| C   | -0.83759100 | 2.68620300  | -0.00606400 |
| C   | -1.77482700 | 1.62974300  | -0.07018300 |
| C   | -1.32289600 | 0.33361300  | -0.07573700 |
| C   | 0.07002500  | 0.05747200  | -0.03062300 |
| C   | 0.99074700  | 1.12909100  | 0.04463600  |
| C   | 0.55734200  | -1.27107800 | -0.11011700 |
| N   | 1.83496000  | -1.56628800 | -0.08505700 |
| C   | 2.73998000  | -0.54139100 | 0.01678800  |
| C   | 2.36634100  | 0.77634500  | 0.07879900  |
| O   | -2.22391900 | -0.67708900 | -0.15145500 |
| C   | -1.78366700 | -1.95448000 | 0.37423900  |
| C   | -0.46528300 | -2.36084100 | -0.26626200 |
| O   | -1.26161700 | 3.97712900  | 0.00338100  |
| C   | 4.17975100  | -0.95858900 | 0.04887200  |
| C   | -2.90092400 | -2.93489600 | 0.11057700  |
| H   | 1.20986000  | 3.29099000  | 0.11669100  |
| H   | -2.83825900 | 1.84060600  | -0.10483000 |
| H   | 3.11831100  | 1.55479200  | 0.14669700  |
| H   | -1.63732600 | -1.81711100 | 1.45212400  |
| H   | -0.10193900 | -3.28453000 | 0.18838900  |
| H   | -0.62518400 | -2.55012900 | -1.33497500 |
| H   | -2.22492800 | 4.02265500  | -0.05166200 |
| H   | 4.36275700  | -1.61886300 | 0.90109200  |
| H   | 4.43142600  | -1.51778000 | -0.85640900 |
| H   | 4.84191900  | -0.09568600 | 0.12432000  |
| H   | -3.82563800 | -2.60064900 | 0.58474800  |
| H   | -3.06944900 | -3.03939000 | -0.96422400 |
| H   | -2.63469900 | -3.91202300 | 0.51879800  |

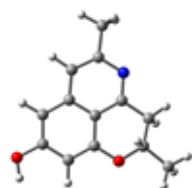

**[3β-d]-1d**

M062x/6-311+G\*\*

SCF: -708.3590008

Correction ZPE: 0.229191

Correction Free energy: 0.190039

Sum of free energies: -708.1689618

|          |             |             |             |
|----------|-------------|-------------|-------------|
| 0 1      |             |             |             |
| C        | 0.51978800  | 2.45727800  | 0.06161400  |
| C        | -0.83759000 | 2.68620300  | -0.00606400 |
| C        | -1.77482700 | 1.62974300  | -0.07018300 |
| C        | -1.32289600 | 0.33361300  | -0.07573700 |
| C        | 0.07002500  | 0.05747200  | -0.03062300 |
| C        | 0.99074700  | 1.12909100  | 0.04463600  |
| C        | 0.55734100  | -1.27107800 | -0.11011700 |
| N        | 1.83496000  | -1.56628800 | -0.08505700 |
| C        | 2.73998000  | -0.54139200 | 0.01678800  |
| C        | 2.36634100  | 0.77634500  | 0.07879900  |
| O        | -2.22391900 | -0.67708900 | -0.15145500 |
| C        | -1.78366700 | -1.95448000 | 0.37423900  |
| C        | -0.46528400 | -2.36084100 | -0.26626200 |
| C        | 4.17975100  | -0.95858900 | 0.04887100  |
| C        | -2.90092400 | -2.93489600 | 0.11057700  |
| O        | -1.26161700 | 3.97712900  | 0.00338100  |
| H        | 1.20986100  | 3.29099000  | 0.11669100  |
| H        | -2.83825900 | 1.84060600  | -0.10483000 |
| H        | 3.11831200  | 1.55479200  | 0.14669700  |
| H        | -1.63732700 | -1.81711100 | 1.45212400  |
| H(iso=2) | -0.10194000 | -3.28453000 | 0.18838900  |
| H        | -0.62518400 | -2.55012900 | -1.33497500 |
| H        | 4.36275700  | -1.61886400 | 0.90109200  |
| H        | 4.43142600  | -1.51778000 | -0.85640900 |
| H        | 4.84191900  | -0.09568700 | 0.12432000  |
| H        | -3.82563800 | -2.60064900 | 0.58474800  |
| H        | -3.06945000 | -3.03938900 | -0.96422400 |
| H        | -2.63470000 | -3.91202300 | 0.51879800  |
| H        | -2.22492800 | 4.02265600  | -0.05166200 |

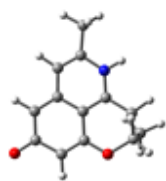

*i*

M062x/6-311+G\*\*

SCF: -708.35461

Correction ZPE: 0.233136

Correction Free energy: 0.194154

Sum of free energies: -708.160456

0 1

|          |             |             |             |
|----------|-------------|-------------|-------------|
| C        | -0.92174900 | -2.27441900 | 0.15896900  |
| C        | -2.26228900 | -1.79847800 | 0.02017600  |
| C        | -2.45129800 | -0.37811900 | -0.21414300 |
| C        | -1.39570400 | 0.47241700  | -0.31010900 |
| C        | -0.05442700 | -0.01794500 | -0.18400900 |
| C        | 0.15711800  | -1.41740900 | 0.05962400  |
| C        | 1.01191700  | 0.84616400  | -0.31775000 |
| N        | 2.26087300  | 0.37791800  | -0.20020500 |
| C        | 2.54915700  | -0.95075000 | 0.04561200  |
| C        | 1.52646200  | -1.83397500 | 0.17459700  |
| O        | -1.61117000 | 1.79014900  | -0.56868800 |
| C        | -0.59703000 | 2.71425800  | -0.10534600 |
| C        | 0.77529300  | 2.28989600  | -0.62280700 |
| O        | -3.26428100 | -2.56738900 | 0.10608900  |
| C        | 3.99867000  | -1.29353900 | 0.15036400  |
| C        | -0.66211800 | 2.84528300  | 1.40585600  |
| H        | -0.76553100 | -3.33207500 | 0.34221600  |
| H        | -3.46319400 | 0.00103100  | -0.30781400 |
| H(iso=2) | 3.03464700  | 1.03104200  | -0.29266000 |
| H        | 1.75488500  | -2.87583600 | 0.36490400  |
| H        | -0.87609000 | 3.65856300  | -0.57076600 |
| H        | 1.55301000  | 2.91100200  | -0.17258400 |
| H        | 0.82525800  | 2.42221200  | -1.70868100 |
| H        | 4.46610300  | -0.73144200 | 0.96348600  |
| H        | 4.11901100  | -2.35842200 | 0.34297100  |
| H        | 4.51985500  | -1.03921900 | -0.77655800 |
| H        | -1.67759300 | 3.10389900  | 1.71208200  |
| H        | -0.36771700 | 1.91993200  | 1.90818000  |
| H        | 0.01084000  | 3.64149300  | 1.73124700  |

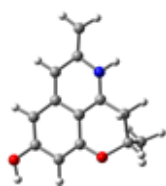

*iv*

M062x/6-311+G\*\*

SCF: -708.3118056

Correction ZPE: 0.228452

Correction Free energy: 0.189417

Sum of free energies: -708.1223886

0 1

|          |             |             |             |
|----------|-------------|-------------|-------------|
| C        | -1.27246500 | -2.07854300 | 0.15986200  |
| C        | -2.41185700 | -1.34330800 | 0.01295600  |
| C        | -2.41115600 | 0.07201500  | -0.22025200 |
| C        | -1.21437700 | 0.71480100  | -0.30775200 |
| C        | 0.01454000  | -0.00795500 | -0.17573000 |
| C        | 0.00824800  | -1.43666500 | 0.06667100  |
| C        | 1.21846100  | 0.64480700  | -0.30929700 |
| N        | 2.36704100  | -0.03127800 | -0.19328100 |
| C        | 2.47407700  | -1.41759900 | 0.05382000  |
| C        | 1.21013400  | -2.09568100 | 0.17651000  |
| O        | -1.19174900 | 2.04814200  | -0.56376300 |
| C        | -0.02494500 | 2.77670100  | -0.10779500 |
| C        | 1.24664600  | 2.10784400  | -0.62185400 |
| C        | 3.70552200  | -1.98373300 | 0.15229800  |
| C        | -0.06421600 | 2.92668300  | 1.40239500  |
| O        | -3.60676800 | -1.98893600 | 0.10445300  |
| H        | -1.33696600 | -3.14530100 | 0.34017000  |
| H        | -3.34464500 | 0.61394400  | -0.31781700 |
| H(iso=2) | 3.23487100  | 0.48659600  | -0.29145700 |
| H        | 1.23169300  | -3.16427600 | 0.35573000  |
| H        | -0.13210300 | 3.75325300  | -0.57819300 |
| H        | 2.12202200  | 2.58306100  | -0.17278000 |
| H        | 1.32126500  | 2.22578600  | -1.70800300 |
| H        | 3.79642500  | -3.04414700 | 0.34413600  |
| H        | 4.60566200  | -1.39120700 | 0.04342400  |
| H        | -1.01198400 | 3.37346900  | 1.70888200  |
| H        | 0.05108700  | 1.96452000  | 1.90830900  |
| H        | 0.74727300  | 3.58337000  | 1.72341900  |
| H(iso=2) | -4.33740700 | -1.36996900 | -0.01937400 |

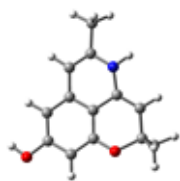

ii

M062x/6-311+G\*\*

SCF: -708.3357214

Correction ZPE: 0.228183

Correction Free energy: 0.188426

Sum of free energies: -708.1472954

|          |             |             |             |
|----------|-------------|-------------|-------------|
| 0 1      |             |             |             |
| C        | -0.81314300 | -2.23890000 | 0.20493400  |
| C        | -2.11186500 | -1.78428500 | 0.00824600  |
| C        | -2.38443000 | -0.44259300 | -0.27134800 |
| C        | -1.32491500 | 0.44879600  | -0.33395300 |
| C        | -0.00876800 | 0.02262400  | -0.11914100 |
| C        | 0.25456100  | -1.33526600 | 0.12726200  |
| C        | 1.06647800  | 1.00000500  | -0.24435800 |
| N        | 2.35104300  | 0.46614500  | -0.24738400 |
| C        | 2.63270900  | -0.85063500 | 0.03599300  |
| C        | 1.63885200  | -1.74820900 | 0.24336300  |
| O        | -1.58343600 | 1.73727400  | -0.68801800 |
| C        | -0.65702200 | 2.74478800  | -0.20010400 |
| C        | 0.77381900  | 2.30900900  | -0.36427100 |
| C        | 4.08785200  | -1.19182900 | 0.08604900  |
| C        | -1.01228500 | 3.07492600  | 1.24426000  |
| O        | -3.18695300 | -2.61996000 | 0.07362800  |
| H        | -0.62989800 | -3.29067400 | 0.40047300  |
| H        | -3.40139300 | -0.10741000 | -0.43600400 |
| H(iso=2) | 3.12754200  | 1.10897500  | -0.34052900 |
| H        | 1.88109500  | -2.78191600 | 0.45316200  |
| H        | -0.86628100 | 3.60890300  | -0.83195400 |
| H        | 1.54149300  | 3.06598800  | -0.47445800 |
| H        | 4.22354000  | -2.25146500 | 0.29810900  |
| H        | 4.56757700  | -0.95723300 | -0.86841600 |
| H        | 4.59029200  | -0.60840200 | 0.86293600  |
| H        | -0.84913700 | 2.20393100  | 1.88606000  |
| H        | -2.05576200 | 3.39121200  | 1.32331700  |
| H        | -0.37342300 | 3.88678700  | 1.59997800  |
| H(iso=2) | -2.90089500 | -3.52081900 | 0.27254800  |

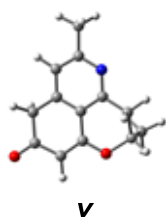

M062x/6-311+G\*\*

SCF: -708.3470206

Correction ZPE: 0.23238

Correction Free energy: 0.192286

Sum of free energies: -708.1547346

|          |             |             |             |
|----------|-------------|-------------|-------------|
| 0 1      |             |             |             |
| C        | -1.08108800 | -2.23030200 | 0.28758300  |
| C        | -2.41579800 | -1.58619600 | -0.01371900 |
| C        | -2.47355100 | -0.16222000 | -0.22905500 |
| C        | -1.34124800 | 0.58738900  | -0.27338000 |
| C        | -0.00876400 | -0.00209600 | -0.15034400 |
| C        | 0.12825300  | -1.36563100 | 0.11048500  |
| C        | 1.13731600  | 0.77713400  | -0.34102700 |
| N        | 2.36495100  | 0.27626800  | -0.25797700 |
| C        | 2.50779700  | -1.03358000 | 0.01079800  |
| C        | 1.41609700  | -1.87961300 | 0.19336800  |
| O        | -1.45233300 | 1.90323300  | -0.49377600 |
| C        | -0.34090000 | 2.76259600  | -0.10544500 |
| C        | 0.95698800  | 2.22564200  | -0.68976600 |
| C        | 3.91377800  | -1.54549300 | 0.10103400  |
| C        | -0.32349700 | 2.91051300  | 1.40445600  |
| O        | -3.42826400 | -2.28829900 | -0.02185300 |
| H        | -1.13172400 | -2.56537600 | 1.33161400  |
| H(iso=2) | -0.99234600 | -3.14001700 | -0.31311900 |
| H        | -3.44242200 | 0.30603600  | -0.35861700 |
| H        | 1.57452600  | -2.93329200 | 0.39416000  |
| H        | -0.59004000 | 3.71537000  | -0.56992600 |
| H        | 0.93725700  | 2.32387700  | -1.78057700 |
| H        | 1.80017500  | 2.81002500  | -0.31734800 |
| H        | 4.44583600  | -1.34839900 | -0.83326200 |
| H        | 4.44956800  | -1.02631600 | 0.90013400  |
| H        | 3.93471400  | -2.61654700 | 0.30117300  |
| H        | -0.08203000 | 1.96712800  | 1.90178500  |
| H        | -1.29602300 | 3.25597900  | 1.76010000  |
| H        | 0.43033100  | 3.64931700  | 1.68483700  |

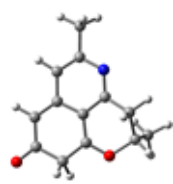

**vi**

M062x/6-311+G\*\*

SCF: -708.3231497

Correction ZPE: 0.231702

Correction Free energy: 0.191999

Sum of free energies: -708.1311507

|          |             |             |             |
|----------|-------------|-------------|-------------|
| 0 1      |             |             |             |
| C        | 2.39770700  | -1.24109700 | 0.03757200  |
| N        | 2.37471300  | 0.12150400  | -0.24853800 |
| C        | 1.27843700  | -2.00665800 | 0.17674000  |
| C        | -0.02810500 | -1.42982300 | 0.06188800  |
| C        | -0.02674900 | -0.00413300 | -0.16692500 |
| C        | 1.21277400  | 0.69206600  | -0.34407600 |
| C        | -1.19531900 | -2.16228200 | 0.17186400  |
| C        | -2.46664600 | -1.54042700 | 0.03872100  |
| C        | -2.51756200 | -0.04566000 | -0.23238500 |
| C        | -1.22172300 | 0.67472200  | -0.25627300 |
| O        | -1.31905200 | 1.97797500  | -0.36675200 |
| C        | -0.11854600 | 2.78847700  | -0.12511000 |
| C        | 1.09748600  | 2.12995600  | -0.75649900 |
| C        | 3.77123300  | -1.81707800 | 0.16401200  |
| C        | 0.00397500  | 3.01179200  | 1.36911400  |
| O        | -3.54897600 | -2.14509500 | 0.12172400  |
| H        | 1.37128500  | -3.06838300 | 0.37401800  |
| H        | -1.15743300 | -3.22810800 | 0.36624700  |
| H        | -3.17856700 | 0.43104700  | 0.49929100  |
| H(iso=2) | -3.00026600 | 0.09973900  | -1.20858600 |
| H        | -0.34340700 | 3.72417300  | -0.63304500 |
| H        | 1.99646900  | 2.68309000  | -0.48128500 |
| H        | 1.00525500  | 2.15555100  | -1.84814300 |
| H        | 4.32963400  | -1.64885200 | -0.76136100 |
| H        | 3.74170100  | -2.88561500 | 0.37568300  |
| H        | 4.31364000  | -1.30735300 | 0.96573800  |
| H        | -0.91290500 | 3.45464800  | 1.76137800  |
| H        | 0.20310600  | 2.07771800  | 1.90097300  |
| H        | 0.83095100  | 3.69964500  | 1.55721700  |



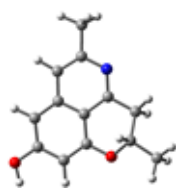

**[7-d]-1d**

M062x/6-311+G\*\*

SCF: -708.3590009

Correction ZPE: 0.229274

Correction Free energy: 0.190127

Sum of free energies: -708.1688739

|          |             |             |             |
|----------|-------------|-------------|-------------|
| 0 1      |             |             |             |
| C        | 0.51980700  | 2.45727300  | 0.06161400  |
| C        | -0.83757000 | 2.68620800  | -0.00606400 |
| C        | -1.77481500 | 1.62975600  | -0.07018100 |
| C        | -1.32289400 | 0.33362300  | -0.07573400 |
| C        | 0.07002500  | 0.05747100  | -0.03061700 |
| C        | 0.99075600  | 1.12908400  | 0.04463800  |
| C        | 0.55733200  | -1.27108200 | -0.11011200 |
| N        | 1.83494700  | -1.56630100 | -0.08505500 |
| C        | 2.73997600  | -0.54141200 | 0.01678700  |
| C        | 2.36634700  | 0.77632700  | 0.07879900  |
| O        | -2.22392300 | -0.67707100 | -0.15145400 |
| C        | -1.78368400 | -1.95446800 | 0.37423900  |
| C        | -0.46530100 | -2.36083800 | -0.26625800 |
| C        | 4.17974300  | -0.95862100 | 0.04886600  |
| C        | -2.90094800 | -2.93487400 | 0.11057000  |
| O        | -1.26158300 | 3.97713900  | 0.00337900  |
| H(iso=2) | 1.20988400  | 3.29098100  | 0.11668800  |
| H        | -2.83824500 | 1.84062800  | -0.10483000 |
| H        | 3.11832400  | 1.55476700  | 0.14669500  |
| H        | -1.63734700 | -1.81710100 | 1.45212400  |
| H        | -0.10196600 | -3.28452900 | 0.18839500  |
| H        | -0.62519900 | -2.55012400 | -1.33497100 |
| H        | 4.36274400  | -1.61890100 | 0.90108300  |
| H        | 4.43141100  | -1.51780900 | -0.85641800 |
| H        | 4.84191700  | -0.09572400 | 0.12432000  |
| H        | -3.82565900 | -2.60062400 | 0.58474200  |
| H        | -3.06947200 | -3.03935800 | -0.96423200 |
| H        | -2.63473000 | -3.91200600 | 0.51878400  |
| H(iso=2) | -2.22489100 | 4.02268300  | -0.05167700 |

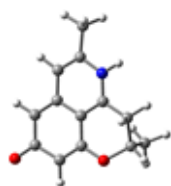

iii

M062x/6-311+G\*\*

SCF: -708.35461

Correction ZPE: 0.229833

Correction Free energy: 0.190744

Sum of free energies: -708.163866

|          |             |             |             |
|----------|-------------|-------------|-------------|
| 0 1      |             |             |             |
| C        | 2.54915700  | -0.95074900 | 0.04561200  |
| N        | 2.26087300  | 0.37791900  | -0.20020500 |
| C        | 1.52646200  | -1.83397500 | 0.17459700  |
| C        | 0.15711900  | -1.41740900 | 0.05962300  |
| C        | -0.05442700 | -0.01794500 | -0.18400900 |
| C        | 1.01191700  | 0.84616400  | -0.31775000 |
| C        | -0.92174800 | -2.27442000 | 0.15896800  |
| C        | -2.26228900 | -1.79847800 | 0.02017600  |
| C        | -2.45129700 | -0.37811900 | -0.21414300 |
| C        | -1.39570400 | 0.47241600  | -0.31010900 |
| O        | -1.61117000 | 1.79014900  | -0.56868900 |
| C        | -0.59703100 | 2.71425800  | -0.10534600 |
| C        | 0.77529300  | 2.28989700  | -0.62280600 |
| C        | 3.99867000  | -1.29353800 | 0.15036500  |
| C        | -0.66211900 | 2.84528300  | 1.40585600  |
| O        | -3.26428100 | -2.56738900 | 0.10609000  |
| H(iso=2) | 3.03464700  | 1.03104300  | -0.29266000 |
| H        | 1.75488600  | -2.87583600 | 0.36490300  |
| H        | -0.76553100 | -3.33207600 | 0.34221500  |
| H        | -3.46319400 | 0.00103100  | -0.30781400 |
| H        | -0.87609100 | 3.65856300  | -0.57076600 |
| H        | 1.55301000  | 2.91100200  | -0.17258300 |
| H(iso=2) | 0.82525800  | 2.42221200  | -1.70868000 |
| H        | 4.51985600  | -1.03921600 | -0.77655700 |
| H        | 4.11901200  | -2.35842200 | 0.34297000  |
| H        | 4.46610200  | -0.73144300 | 0.96348800  |
| H        | -1.67759500 | 3.10389700  | 1.71208200  |
| H        | -0.36771700 | 1.91993200  | 1.90818000  |
| H        | 0.01083800  | 3.64149400  | 1.73124800  |

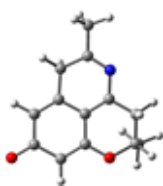

**vii**

M062x/6-311+G\*\*

SCF: -708.3178727

Correction ZPE: 0.231234

Correction Free energy: 0.191189

Sum of free energies: -708.1266837

|          |             |             |             |
|----------|-------------|-------------|-------------|
| 0 1      |             |             |             |
| C        | 2.66276000  | -0.56424500 | 0.00062100  |
| N        | 2.29291100  | 0.63382300  | -0.30354800 |
| C        | 1.72493800  | -1.65379900 | 0.42362200  |
| C        | 0.27838300  | -1.37741900 | 0.15687400  |
| C        | -0.05298600 | 0.00221200  | -0.11193500 |
| C        | 0.93213000  | 0.92611500  | -0.29460600 |
| C        | -0.68721500 | -2.32148500 | 0.19345500  |
| C        | -2.08777700 | -1.97471800 | -0.02556300 |
| C        | -2.41496400 | -0.58318800 | -0.26168800 |
| C        | -1.44298200 | 0.36360100  | -0.29556600 |
| O        | -1.76953400 | 1.64344800  | -0.57218400 |
| C        | -0.84450100 | 2.66903500  | -0.12390300 |
| C        | 0.56789900  | 2.34173400  | -0.58899700 |
| C        | 4.11024800  | -0.91110400 | -0.03141100 |
| C        | -0.96332300 | 2.84411600  | 1.37978700  |
| O        | -2.97368700 | -2.85208000 | -0.00246400 |
| H        | 1.87526600  | -1.76278500 | 1.50906100  |
| H(iso=2) | 2.04699100  | -2.60504900 | -0.00833800 |
| H        | -0.45465500 | -3.36390200 | 0.38541000  |
| H        | -3.45326600 | -0.31308000 | -0.41579700 |
| H        | -1.19697300 | 3.56748200  | -0.62840300 |
| H        | 1.28352300  | 3.01116500  | -0.10477300 |
| H        | 0.66901700  | 2.49538600  | -1.67084200 |
| H        | 4.72170800  | -0.02381900 | -0.18612400 |
| H        | 4.28755600  | -1.62334700 | -0.84422300 |
| H        | 4.39788100  | -1.41155200 | 0.89757000  |
| H        | -2.00387800 | 3.03022100  | 1.65268800  |
| H        | -0.60801900 | 1.96299000  | 1.92058900  |
| H        | -0.36542200 | 3.70347000  | 1.69105300  |

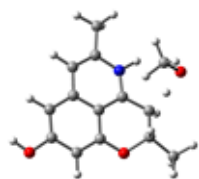

**iTS**

M062x/6-311+G\*\*

SCF: -824.027078055

Correction ZPE: 0.266235

Correction Free energy: 0.221815

Sum of free energies: -823.805263

Imaginary frequency: 1 (-971.8274)

0 1

|          |             |             |             |
|----------|-------------|-------------|-------------|
| C        | 2.65305700  | -1.16861700 | 0.33270400  |
| C        | 3.26782200  | 0.07390100  | 0.32917000  |
| C        | 2.55808300  | 1.26410400  | 0.07718300  |
| C        | 1.20514800  | 1.20037500  | -0.15621300 |
| C        | 0.54277800  | -0.05750100 | -0.15328500 |
| C        | 1.28119700  | -1.24784000 | 0.06194200  |
| C        | -0.81729200 | -0.11201700 | -0.52557100 |
| N        | -1.36689300 | -1.32149300 | -0.70265600 |
| C        | -0.71438200 | -2.51492400 | -0.46906600 |
| C        | 0.58280300  | -2.49043200 | -0.06815800 |
| O        | 0.52857100  | 2.32848300  | -0.45021800 |
| C        | -0.89575200 | 2.29819100  | -0.11252200 |
| C        | -1.60839000 | 1.08998700  | -0.67401400 |
| C        | -1.52626700 | -3.74914700 | -0.67965100 |
| C        | -1.47582500 | 3.60687700  | -0.59099800 |
| O        | 4.59123100  | 0.21978500  | 0.56083200  |
| H        | 3.23260700  | -2.06784000 | 0.51068000  |
| H        | 3.07818100  | 2.21410500  | 0.06924000  |
| H(iso=2) | -2.35173500 | -1.35552700 | -0.96097100 |
| H        | 1.10126500  | -3.42345900 | 0.11338600  |
| H        | -0.92122400 | 2.25068100  | 0.98325000  |
| H        | -1.99048900 | 1.21315700  | -1.69210800 |
| H        | -0.93344300 | -4.63304800 | -0.45025400 |
| H        | -2.41089300 | -3.73715700 | -0.03706900 |
| H        | -1.86675300 | -3.80726700 | -1.71696700 |
| H        | -1.39105600 | 3.68450000  | -1.67794500 |
| H        | -0.96112700 | 4.45189800  | -0.13015800 |
| H        | -2.53318200 | 3.65361900  | -0.32099600 |
| H(iso=2) | 5.00586800  | -0.63913500 | 0.71978400  |
| O        | -3.66496100 | 0.42467600  | 0.80190800  |
| C        | -3.03951200 | -0.19883400 | 1.88737800  |
| H(iso=2) | -3.39290000 | 0.19277400  | 2.85332500  |
| H(iso=2) | -1.94328500 | -0.04835400 | 1.87479300  |
| H(iso=2) | -3.20573400 | -1.28865700 | 1.89814600  |
| H(iso=2) | -2.66738000 | 0.84186800  | 0.02887100  |

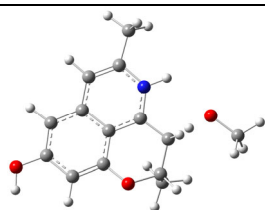

***i*TS ( $\alpha$ -attack)**

M062x/6-311+G\*\*  
 SCF: -824.023843936  
 Correction ZPE: 0.266052  
 Correction Free energy: 0.220795  
 Sum of free energies: -823.803049  
 Imaginary frequency: 1 (-967.23)

0 1

|           |             |             |             |
|-----------|-------------|-------------|-------------|
| O         | -3.70925100 | 0.06961100  | 0.69723800  |
| C         | -4.67888700 | -0.91087000 | 0.45375900  |
| H (iso=2) | -5.63200000 | -0.47991800 | 0.11092600  |
| H(iso=2)  | -4.90418400 | -1.51356700 | 1.34775900  |
| H(iso=2)  | 4.35548500  | -1.61845200 | -0.33281700 |
| H(iso=2)  | -2.67209100 | -0.30000400 | -0.04630800 |
| C         | 2.92185300  | 0.70396500  | 0.40772000  |
| C         | 3.30822100  | -0.61402900 | 0.21988900  |
| C         | 2.40335500  | -1.61115200 | -0.19499200 |
| C         | 1.08372900  | -1.27756500 | -0.39667700 |
| C         | 0.65237200  | 0.06008600  | -0.19190400 |
| C         | 1.58798200  | 1.05926500  | 0.18120300  |
| C         | -0.68222000 | 0.39652100  | -0.49172900 |
| N         | -1.02158300 | 1.69173400  | -0.44053500 |
| C         | -0.16538400 | 2.71099800  | -0.07447400 |
| C         | 1.11589500  | 2.40761200  | 0.25656500  |
| O         | 0.22926900  | -2.21301700 | -0.85038800 |
| C         | -1.18325500 | -2.01442200 | -0.50667900 |
| C         | -1.67428900 | -0.61165800 | -0.81005000 |
| C         | -0.75052300 | 4.08419300  | -0.07709300 |
| C         | -1.36385400 | -2.40529000 | 0.95217200  |
| O         | 4.60579700  | -0.91439400 | 0.44823800  |
| H         | 3.65368100  | 1.44539800  | 0.70488300  |
| H         | 2.74014500  | -2.63006900 | -0.35001300 |
| H(iso=2)  | -1.98969600 | 1.93127700  | -0.64861500 |
| H         | 1.79198800  | 3.20142200  | 0.54793200  |
| H         | -1.69394500 | -2.73270000 | -1.14646000 |
| H         | -2.06027900 | -0.47737500 | -1.82432500 |
| H         | -1.63934600 | 4.12127700  | 0.55824400  |
| H         | -0.02054600 | 4.80384300  | 0.28998100  |
| H         | -1.04963500 | 4.36622600  | -1.09039200 |
| H         | -0.90133100 | -1.67392700 | 1.62210200  |
| H         | -0.92348100 | -3.38724900 | 1.14017400  |
| H         | -2.42960600 | -2.45031800 | 1.18601100  |
| H(iso=2)  | 4.78040500  | -1.85152900 | 0.28770800  |

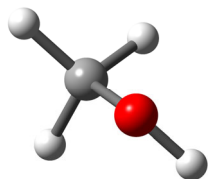

M062x/6-311+G\*\*  
 SCF: -115.713966  
 Correction ZPE: 0.038732  
 Correction Free energy: 0.015114  
 Sum of free energies: -115.698852

0 1  
 C 0.66856500 -0.01984400 0.00000400  
 O -0.74871300 0.12386300 -0.00000800  
 H(iso=2) 1.09378200 0.98362000 -0.00008100  
 H(iso=2) 1.01396700 -0.55072100 -0.89156300  
 H(iso=2) 1.01396700 -0.55057500 0.89165800  
 H(iso=2) -1.14340100 -0.75416400 0.00002800

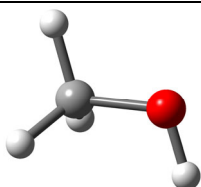

M062x/6-311+G\*\*  
 SCF: -115.7140789  
 Correction ZPE: 0.042099  
 Correction Free energy: 0.01876  
 Sum of free energies: -115.6953189

0 1  
 C 0.66856400 -0.01984400 0.00000400  
 O -0.74871300 0.12386300 0.00000600  
 H(Iso=2) 1.09378200 0.98362000 -0.00035200  
 H(Iso=2) 1.01393400 -0.55092300 -0.89145500  
 H(Iso=2) 1.01400100 -0.55037200 0.89176600  
 H -1.14340000 -0.75416400 -0.00002700

## References

- 1 S. Oshimi, J. eguchi, Y. Hirasawa, W. Ekasari, A. Widyawaruyanti, T. S. Wahyuni, N. C. Zaini, O. Shirota and H. Morita, *J. Nat. Prod.*, 2009, **72**, 1899–1901.
- 2 Y. Tazaki, Y. Tsuchiya, T. Choshi, T. Nishiyama, N. Hatae, H. Nemoto and S. Hibino, *Heterocycles*, 2014, **89**, 427–435.
- 3 H. Morita, Y. Tomizawa, Y. Deguchi, T. Ishikawa, H. Arai, K. Zaima, T. Hosoya, Y. Hirasawa, T. Matsumoto, K. Kamata, W. Ekasari, A. Widyawaruyanti, T. S. Wahyuni, N. C. Zaini and T. Honda, *Bioorg. Med. Chem.*, 2009, **17**, 8234–8240.
- 4 L.-M. Li, G.-Y. Liu, J. Lou, H. Wang, J.-X. Yang, Q.-F. Hu and Y.-Q. Ye, *Asian J. Chem.*, 2015, **27**, 2349–2350.
- 5 Hyperchem Professional Release 7.52, Hypercube, Inc., 2005.
- 6 Gaussian 09, Revision D.01: M. J. Frisch, G. W. Trucks, H. B. Schlegel, G. E. Scuseria, M. A. Robb, J. R. Cheeseman, G. Scalmani, V. Barone, B. Mennucci, G. A. Petersson, H. Nakatsuji, M. Caricato, X. Li, H. P. Hratchian, A. F. Izmaylov, J. Bloino, G. Zheng, J. L. Sonnenberg, M. Hada, M. Ehara, K. Toyota, R. Fukuda, J. Hasegawa, M. Ishida, T. Nakajima, Y. Honda, O. Kitao, H. Nakai, T. Vreven, J. A. Montgomery, Jr., J. E. Peralta, F. Ogliaro, M. Bearpark, J. J. Heyd, E. Brothers, K. N. Kudin, V. N. Staroverov, T. Keith, R. Kobayashi, J. Normand, K. Raghavachari, A. Rendell, J. C. Burant, S. S. Iyengar, J. Tomasi, M. Cossi, N. Rega, J. M. Millam, M. Klene, J. E. Knox, J. B. Cross, V. Bakken, C. Adamo, J. Jaramillo, R. Gomperts, R. E. Stratmann, O. Yazyev, A. J. Austin, R. Cammi, C. Pomelli, J. W. Ochterski, R. L. Martin, K. Morokuma, V. G. Zakrzewski, G. A. Voth, P. Salvador, J. J. Dannenberg, S. Dapprich, A. D. Daniels, O. Farkas, J. B. Foresman, J. V. Ortiz, J. Cioslowski, and D. J. Fox, Gaussian, Inc., Wallingford CT, 2013.
